# Supplementary material
Source: publisher figshare collection journal article supplement (https://tandf.figshare.com/articles/dataset/_/16611341)
Supplement: Supplementary file 1 [file 2]

## Sheet: TS group Up
Query	COG	Gene	Description of products of genes upregulated in the TS group
WP_000003555.1	M		HlyD membrane-fusion protein of T1SS
WP_000037727.1	S	pfpI	DJ-1/PfpI family
WP_000052002.1	C	cioA	Ubiquinol Oxidase
WP_000075233.1	U	secY	The central subunit of the protein translocation channel SecYEG. Consists of two halves formed by TMs 1-5 and 6-10. These two domains form a lateral gate at the front which open onto the bilayer between TMs 2 and 7, and are clamped together by SecE at the back. The channel is closed by both a pore ring composed of hydrophobic SecY resides and a short helix (helix 2A) on the extracellular side of …
WP_000078874.1	M	lpxL	Catalyzes the transfer of laurate from lauroyl-acyl carrier protein (ACP) to Kdo(2)-lipid IV(A) to form Kdo(2)- (lauroyl)-lipid IV(A)
WP_000083565.1	Q		Domain of unknown function (DUF4442)
WP_000083629.1	S	dotU1	Type VI secretion system protein DotU
WP_000084237.1	C	atpI	ATP synthase I chain
WP_000107954.1	P	pstA	Phosphate transport system permease
WP_000113824.1	J	fusA	Catalyzes the GTP-dependent ribosomal translocation step during translation elongation. During this step, the ribosome changes from the pre-translocational (PRE) to the post- translocational (POST) state as the newly formed A-site-bound peptidyl-tRNA and P-site-bound deacylated tRNA move to the P and E sites, respectively. Catalyzes the coordinated movement of the two tRNA molecules, the mRNA and…
WP_000121137.1	CP	nuoL	COG1009 NADH ubiquinone oxidoreductase subunit 5 (chain L) Multisubunit Na H antiporter, MnhA subunit
WP_000140309.1	J	rpsA	thus facilitating recognition of the initiation point. It is needed to translate mRNA with a short Shine-Dalgarno (SD) purine-rich sequence
WP_000166834.1		fimB
WP_000199593.1	I	desC	Fatty acid desaturase
WP_000205997.1	K	himD	This protein is one of the two subunits of integration host factor, a specific DNA-binding protein that functions in genetic recombination as well as in transcriptional and translational control
WP_000208695.1	J	truB	Responsible for synthesis of pseudouridine from uracil- 55 in the psi GC loop of transfer RNAs
WP_000253662.1	S		Domain of unknown function (DUF4902)
WP_000355489.1	NU	pilT	twitching motility protein
WP_000369287.1	S		Belongs to the UPF0145 family
WP_000372818.1	S	yjcH	Protein of unknown function, DUF485
WP_000472466.1	T		PhoQ Sensor
WP_000501183.1	S	yggT	YGGT family
WP_000506572.1	J	ychF	ATPase that binds to both the 70S ribosome and the 50S ribosomal subunit in a nucleotide-independent manner
WP_000542522.1	P		Binding-protein-dependent transport system inner membrane component
WP_000566431.1	C	cioB	Cytochrome bd terminal oxidase subunit II
WP_000612365.1	L	exoA	Endonuclease/Exonuclease/phosphatase family
WP_000624763.1	H	panB	Catalyzes the reversible reaction in which hydroxymethyl group from 5,10-methylenetetrahydrofolate is transferred onto alpha-ketoisovalerate to form ketopantoate
WP_000667115.1
WP_000687236.1	S		protein domain associated with
WP_000689287.1	V		Beta-lactamase
WP_000724344.1
WP_000731819.1	NU		Type-1 fimbrial protein, A
WP_000753036.1	S		Protein of unknown function (DUF1449)
WP_000757175.1
WP_000770248.1	O	yeaZ	Glycoprotease family
WP_000786639.1	S		PgaD-like protein
WP_000828390.1	E	iscS	Master enzyme that delivers sulfur to a number of partners involved in Fe-S cluster assembly, tRNA modification or cofactor biosynthesis. Catalyzes the removal of elemental sulfur atoms from cysteine to produce alanine. Functions as a sulfur delivery protein for Fe-S cluster synthesis onto IscU, an Fe-S scaffold assembly protein, as well as other S acceptor proteins
WP_000842416.1	O	mucD	Belongs to the peptidase S1C family
WP_000846676.1
WP_000852577.1	C	qoxC	Cytochrome c oxidase subunit III
WP_000878003.1	C	nuoB	NDH-1 shuttles electrons from NADH, via FMN and iron- sulfur (Fe-S) centers, to quinones in the respiratory chain. The immediate electron acceptor for the enzyme in this species is believed to be ubiquinone. Couples the redox reaction to proton translocation (for every two electrons transferred, four hydrogen ions are translocated across the cytoplasmic membrane), and thus conserves the redox ene…
WP_000885644.1	M	blc	Lipocalin-like domain
WP_000889486.1	S		Peptidase C39 family
WP_000915319.1	O	cyoE	Converts heme B (protoheme IX) to heme O by substitution of the vinyl group on carbon 2 of heme B porphyrin ring with a hydroxyethyl farnesyl side group
WP_000918444.1	E	aroC	Catalyzes the anti-1,4-elimination of the C-3 phosphate and the C-6 proR hydrogen from 5-enolpyruvylshikimate-3-phosphate (EPSP) to yield chorismate, which is the branch point compound that serves as the starting substrate for the three terminal pathways of aromatic amino acid biosynthesis. This reaction introduces a second double bond into the aromatic ring system
WP_000933387.1	D	zapE	Reduces the stability of FtsZ polymers in the presence of ATP
WP_000953840.1	P	oppC	N-terminal TM domain of oligopeptide transport permease C
WP_000959263.1	E	rhtC	LysE type translocator
WP_000993393.1	H	folK	7,8-dihydro-6-hydroxymethylpterin-pyrophosphokinase (HPPK)
WP_000994938.1	S	yuiF	Na H antiporter
WP_001011955.1	C	nuoN	NDH-1 shuttles electrons from NADH, via FMN and iron- sulfur (Fe-S) centers, to quinones in the respiratory chain. The immediate electron acceptor for the enzyme in this species is believed to be ubiquinone. Couples the redox reaction to proton translocation (for every two electrons transferred, four hydrogen ions are translocated across the cytoplasmic membrane), and thus conserves the redox ene…
WP_001047228.1	K		FCD domain
WP_001049892.1	K	MA20_16490	LysR substrate binding domain
WP_001056906.1
WP_001066105.1	EGP		Sugar (and other) transporter
WP_001087641.1	P	pitA	Phosphate transporter family
WP_001088854.1	S		membrane
WP_001120951.1	EGP	dcaK	Major facilitator Superfamily
WP_001139444.1	M	ytfM	Surface antigen
WP_001170315.1	EGP	smvA	Major Facilitator Superfamily
WP_001177528.1	L	ung	Excises uracil residues from the DNA which can arise as a result of misincorporation of dUMP residues by DNA polymerase or due to deamination of cytosine
WP_001182449.1	M	sacB	Stealth protein CR3, conserved region 3
WP_001183878.1	S		ASCH domain
WP_001191208.1	S	IV02_12080	AI-2E family transporter
WP_001227325.1
WP_001270222.1	U	secD	Part of the Sec protein translocase complex. Interacts with the SecYEG preprotein conducting channel. SecDF uses the proton motive force (PMF) to complete protein translocation after the ATP-dependent function of SecA
WP_001273591.1	S	ybgC	Thioesterase-like superfamily
WP_001276875.1	O	trxA	Belongs to the thioredoxin family
WP_001985895.1	E	radC	Belongs to the UPF0758 family
WP_001986121.1	G	catB	Mandelate racemase / muconate lactonizing enzyme, C-terminal domain
WP_002010652.1
WP_002058276.1	S	gloB	Thiolesterase that catalyzes the hydrolysis of S-D- lactoyl-glutathione to form glutathione and D-lactic acid
WP_004746797.1	E	hpcD	5-carboxymethyl-2-hydroxymuconate isomerase
WP_005132334.1	K	pobR	helix_turn_helix isocitrate lyase regulation
WP_005132337.1	K		LysR substrate binding domain
WP_024439056.1	S		Sulfite exporter TauE/SafE
WP_031946819.1	E	tesA	GDSL-like Lipase/Acylhydrolase family
WP_032028081.1	M	mro	Converts alpha-aldose to the beta-anomer
WP_045899749.1	C		2Fe-2S iron-sulfur cluster binding domain
WP_045900547.1	M	kdtA	3-Deoxy-D-manno-octulosonic-acid transferase (kdotransferase)
WP_045901178.1	S		Tetratricopeptide repeat
WP_045901262.1	S	uup	COG0488 ATPase components of ABC transporters with duplicated ATPase domains
WP_045901563.1	S		PepSY-associated TM region
WP_045901583.1	H	cobS	Joins adenosylcobinamide-GDP and alpha-ribazole to generate adenosylcobalamin (Ado-cobalamin). Also synthesizes adenosylcobalamin 5'-phosphate from adenosylcobinamide-GDP and alpha-ribazole 5'-phosphate
WP_047479597.1	KT	algR	LytTr DNA-binding domain
WP_047480246.1	M		Peptidase family M23
WP_047480261.1	IQ		Enoyl-(Acyl carrier protein) reductase
WP_047480568.1	U		hemolysin activation secretion protein
WP_047480665.1	E	prlC	Peptidase family M3
WP_047480724.1
WP_047480977.1	IQ		KR domain
WP_047481287.1	G	sndH	Glucose / Sorbosone dehydrogenase
WP_047481291.1	EG	yxxF	EamA-like transporter family
WP_047481384.1	P		TonB dependent receptor
WP_047481421.1	Q	iucD	L-lysine 6-monooxygenase (NADPH-requiring)
WP_047481425.1	P	cirA	TonB dependent receptor
WP_047481443.1	H	moeA	MoeA N-terminal region (domain I and II)
WP_047481455.1	S	yjdF	Predicted membrane protein (DUF2238)
WP_047481499.1	K		LysR substrate binding domain
WP_047481554.1	H	pdxB	Catalyzes the oxidation of erythronate-4-phosphate to 3- hydroxy-2-oxo-4-phosphonooxybutanoate
WP_047481837.1	S		Domain of Unknown Function (DUF1543)
WP_047481968.1
WP_047482111.1	F	pbuX	Permease family
WP_047482147.1	I		Acyltransferase family
WP_047482180.1
WP_047482200.1	U		Catalyzes the proton-dependent transport of glutamate and aspartate

## Sheet: TS group Down
Query	COG	Gene	Description of products of genes downregulated in the TS group
WP_000003719.1	D	zapA	Activator of cell division through the inhibition of FtsZ GTPase activity, therefore promoting FtsZ assembly into bundles of protofilaments necessary for the formation of the division Z ring. It is recruited early at mid-cell but it is not essential for cell division
WP_000011876.1	S	MA20_18170	Sulfite exporter TauE/SafE
WP_000023431.1	K	parB	Belongs to the ParB family
WP_000054208.1	S	ygfZ	Aminomethyltransferase folate-binding domain
WP_000065138.1	L		DNA helicase
WP_000069845.1	S	yjgB	Alcohol dehydrogenase GroES-like domain
WP_000070798.1	S		ABC1 family
WP_000082610.1	C	lpdA	COG1249 Pyruvate 2-oxoglutarate dehydrogenase complex, dihydrolipoamide dehydrogenase (E3) component, and related enzymes
WP_000084316.1	IQ		AMP-binding enzyme C-terminal domain
WP_000086385.1	C	sdhB	succinate dehydrogenase
WP_000097871.1	K		AraC-like ligand binding domain
WP_000109463.1	G	gph	HAD-hyrolase-like
WP_000123589.1	I	estA	Steryl acetyl hydrolase
WP_000175360.1	H	bioB	Catalyzes the conversion of dethiobiotin (DTB) to biotin by the insertion of a sulfur atom into dethiobiotin via a radical- based mechanism
WP_000188888.1	C	hmp	Globin
WP_000209940.1	G	manB	Phosphoglucomutase/phosphomannomutase, C-terminal domain
WP_000218539.1	M	murE	Catalyzes the addition of meso-diaminopimelic acid to the nucleotide precursor UDP-N-acetylmuramoyl-L-alanyl-D-glutamate (UMAG) in the biosynthesis of bacterial cell-wall peptidoglycan
WP_000229914.1	S	madM	Malonate/sodium symporter MadM subunit
WP_000234081.1	H	ispB	Belongs to the FPP GGPP synthase family
WP_000383200.1	E	aspB	DegT/DnrJ/EryC1/StrS aminotransferase family
WP_000465010.1
WP_000537695.1	NU	pilF	Tetratricopeptide repeat
WP_000554500.1	K	msmR	AraC-like ligand binding domain
WP_000582742.1	L	mug	DNA glycosylase
WP_000600019.1	S		Belongs to the short-chain dehydrogenases reductases (SDR) family
WP_000626048.1
WP_000639068.1	S	ankB	Ankyrin repeats (many copies)
WP_000648864.1	S	gph	Phosphoglycolate phosphatase
WP_000653195.1	S	hcp1	Type VI secretion system effector, Hcp
WP_000658008.1	H		Exhibits S-adenosyl-L-methionine-dependent methyltransferase activity
WP_000679455.1	E	astB	Catalyzes the hydrolysis of N(2)-succinylarginine into N(2)-succinylornithine, ammonia and CO(2)
WP_000735756.1
WP_000771825.1	H	ribF	Belongs to the ribF family
WP_000807316.1	I	gpsA	Glycerol-3-phosphate dehydrogenase
WP_000868422.1	J	gltX	Catalyzes the attachment of glutamate to tRNA(Glu) in a two-step reaction glutamate is first activated by ATP to form Glu-AMP and then transferred to the acceptor end of tRNA(Glu)
WP_000874704.1	C	dhaT	alcohol dehydrogenase
WP_000886807.1	C	ahpF	Alkyl hydroperoxide reductase
WP_000898377.1	Q		dioxygenase activity
WP_000913439.1	H	hemY	COG0457 FOG TPR repeat
WP_000925016.1	S		Fusaric acid resistance protein family
WP_000972583.1	M		D-alanyl-D-alanine carboxypeptidase
WP_000975534.1	F	purN	Catalyzes the transfer of a formyl group from 10- formyltetrahydrofolate to 5-phospho-ribosyl-glycinamide (GAR), producing 5-phospho-ribosyl-N-formylglycinamide (FGAR) and tetrahydrofolate
WP_000994845.1	H	ahcY	May play a key role in the regulation of the intracellular concentration of adenosylhomocysteine
WP_001009277.1	O	ureJ	HupE / UreJ protein
WP_001046417.1	NU	pilE	Prokaryotic N-terminal methylation motif
WP_001048807.1	P	cysW	Binding-protein-dependent transport system inner membrane component
WP_001070989.1	C	nuoH	NDH-1 shuttles electrons from NADH, via FMN and iron- sulfur (Fe-S) centers, to quinones in the respiratory chain. The immediate electron acceptor for the enzyme in this species is believed to be ubiquinone. Couples the redox reaction to proton translocation (for every two electrons transferred, four hydrogen ions are translocated across the cytoplasmic membrane), and thus conserves the redox ene…
WP_001072475.1	V	ydhJ	Barrel-sandwich domain of CusB or HlyD membrane-fusion
WP_001083669.1	L	fokIM	D12 class N6 adenine-specific DNA methyltransferase
WP_001089060.1	P	hemO	Heme oxygenase
WP_001112080.1	I	acd	acyl-CoA dehydrogenase
WP_001115739.1
WP_001123421.1	I	acd	acyl-CoA dehydrogenase
WP_001161758.1	S		Chlorhexidine efflux transporter
WP_001164635.1	E	trpB	The beta subunit is responsible for the synthesis of L- tryptophan from indole and L-serine
WP_001181667.1	P	kup	Transport of potassium into the cell
WP_001182278.1	J	cysS	Belongs to the class-I aminoacyl-tRNA synthetase family
WP_001186876.1	K		AraC-type transcriptional regulator N-terminus
WP_001198432.1	D	tig	Involved in protein export. Acts as a chaperone by maintaining the newly synthesized protein in an open conformation. Functions as a peptidyl-prolyl cis-trans isomerase
WP_001212949.1	S	obg	An essential GTPase which binds GTP, GDP and possibly (p)ppGpp with moderate affinity, with high nucleotide exchange rates and a fairly low GTP hydrolysis rate. Plays a role in control of the cell cycle, stress response, ribosome biogenesis and in those bacteria that undergo differentiation, in morphogenesis control
WP_001216787.1	H	coq7	Oxygenase that introduces the hydroxyl group at carbon five of 2-nonaprenyl-3-methyl-6-methoxy-1,4-benzoquinol resulting in the formation of 2-nonaprenyl-3-methyl-5-hydroxy-6-methoxy-1,4- benzoquinol
WP_001220244.1	F	adk	Catalyzes the reversible transfer of the terminal phosphate group between ATP and AMP. Plays an important role in cellular energy homeostasis and in adenine nucleotide metabolism
WP_001251492.1
WP_001254962.1	O	degS	COG0265 Trypsin-like serine proteases, typically periplasmic, contain C-terminal PDZ domain
WP_001277084.1	P	yeaW	Ring hydroxylating alpha subunit (catalytic domain)
WP_001278631.1	V		Barrel-sandwich domain of CusB or HlyD membrane-fusion
WP_001291249.1	J	rluB	Belongs to the pseudouridine synthase RsuA family
WP_001978744.1	F	gntK	AAA domain
WP_001982681.1	L	rnt	Trims short 3' overhangs of a variety of RNA species, leaving a one or two nucleotide 3' overhang. Responsible for the end-turnover of tRNA specifically removes the terminal AMP residue from uncharged tRNA (tRNA-C-C-A). Also appears to be involved in tRNA biosynthesis
WP_002041624.1	E	leuC	Catalyzes the isomerization between 2-isopropylmalate and 3-isopropylmalate, via the formation of 2-isopropylmaleate
WP_002132747.1	O	cbpA	DnaJ molecular chaperone homology domain
WP_016654453.1	J	ileS	amino acids such as valine, to avoid such errors it has two additional distinct tRNA(Ile)-dependent editing activities. One activity is designated as 'pretransfer' editing and involves the hydrolysis of activated Val-AMP. The other activity is designated 'posttransfer' editing and involves deacylation of mischarged Val-tRNA(Ile)
WP_017816345.1	U	xcpY	Involved in a type II secretion system (T2SS, formerly general secretion pathway, GSP) for the export of proteins
WP_021510165.1	M	czcB	Barrel-sandwich domain of CusB or HlyD membrane-fusion
WP_025465379.1	J	lysS	Belongs to the class-II aminoacyl-tRNA synthetase family
WP_031222883.1	M		Sporulation related domain
WP_031380064.1	S	lpxH	Hydrolyzes the pyrophosphate bond of UDP-2,3- diacylglucosamine to yield 2,3-diacylglucosamine 1-phosphate (lipid X) and UMP by catalyzing the attack of water at the alpha-P atom. Involved in the biosynthesis of lipid A, a phosphorylated glycolipid that anchors the lipopolysaccharide to the outer membrane of the cell
WP_031380235.1	K	ynfL	LysR substrate binding domain
WP_031977029.1	P	alx	Integral membrane protein TerC family
WP_045899720.1	F	pcaB	Adenylosuccinate lyase C-terminus
WP_045899935.1	P		P-type ATPase
WP_045900367.1	D	scpB	Participates in chromosomal partition during cell division. May act via the formation of a condensin-like complex containing Smc and ScpA that pull DNA away from mid-cell into both cell halves
WP_045900492.1	P	hisM	Binding-protein-dependent transport system inner membrane component
WP_045900525.1	S		Phage late control gene D protein (GPD)
WP_045900575.1	T	pilR	Sigma-54 interaction domain
WP_045900744.1	K		Cache domain
WP_045901648.1	I	atoB	Belongs to the thiolase family
WP_045901792.1	K		transcriptional regulator
WP_045901909.1	IQ		Short-chain dehydrogenase reductase Sdr
WP_045901967.1	C	nirB	Belongs to the nitrite and sulfite reductase 4Fe-4S domain family
WP_045902036.1	C	glpD	C-terminal domain of alpha-glycerophosphate oxidase
WP_046879553.1	K		Transcriptional regulator
WP_047479485.1	M		Phosphoesterase family
WP_047479590.1	M	murD	Cell wall formation. Catalyzes the addition of glutamate to the nucleotide precursor UDP-N-acetylmuramoyl-L-alanine (UMA)
WP_047479633.1	K	ada	6-O-methylguanine DNA methyltransferase, DNA binding domain
WP_047479661.1	P	kefC	Belongs to the monovalent cation proton antiporter 2 (CPA2) transporter (TC 2.A.37) family
WP_047479689.1	CE	leuB	Catalyzes the oxidation of 3-carboxy-2-hydroxy-4- methylpentanoate (3-isopropylmalate) to 3-carboxy-4-methyl-2- oxopentanoate. The product decarboxylates to 4-methyl-2 oxopentanoate
WP_047479695.1	NU	fimV	Tfp pilus assembly protein FimV
WP_047479783.1	K		Transcriptional regulator
WP_047480063.1	M	betT	Belongs to the BCCT transporter (TC 2.A.15) family
WP_047480219.1	C	vdh	belongs to the aldehyde dehydrogenase family
WP_047480460.1	IQ		Enoyl-(Acyl carrier protein) reductase
WP_047480677.1	L	mfd	Couples transcription and DNA repair by recognizing RNA polymerase (RNAP) stalled at DNA lesions. Mediates ATP-dependent release of RNAP and its truncated transcript from the DNA, and recruitment of nucleotide excision repair machinery to the damaged site
WP_047480692.1	H		Pfam:Methyltransf_6
WP_047480694.1	P		TonB dependent receptor
WP_047480765.1	C		oxidoreductase
WP_047480900.1	P		AAA domain, putative AbiEii toxin, Type IV TA system
WP_047480923.1	C	aldH	Aldehyde dehydrogenase family
WP_047480995.1	M	kdsA	Belongs to the KdsA family
WP_047481145.1
WP_047481205.1	S	yheS_2	ABC transporter
WP_047481227.1	E	pepN	Domain of unknown function (DUF3458_C) ARM repeats
WP_047481256.1	I	mmgC	Acyl-CoA dehydrogenase, C-terminal domain
WP_047481273.1	S		Exports the biofilm adhesin polysaccharide poly-beta- 1,6-N-acetyl-D-glucosamine (PGA) across the outer membrane. The PGA transported seems to be partially N-deacetylated since N- deacetylation of PGA by PgaB is needed for PGA export through the PgaA porin
WP_047481471.1	C		Aldehyde dehydrogenase family
WP_047481534.1	S		Peptidase dimerisation domain
WP_047481545.1	S	ycaI	Competence protein ComEC
WP_047481721.1	K	rpoD	Sigma factors are initiation factors that promote the attachment of RNA polymerase to specific initiation sites and are then released. This sigma factor is the primary sigma factor during exponential growth
WP_047481740.1	S	eptA	Domain of unknown function (DUF1705)
WP_047481856.1	P	phuR	TonB-dependent receptor
WP_047481903.1	M	slt	COG0741 Soluble lytic murein transglycosylase and related regulatory proteins (some contain LysM invasin domains)

## Sheet: S group Up
Query	COG	Gene	Description of products of genes upregulated in the S group
WP_000003538.1	S	pap	Polyphosphate kinase 2 (PPK2)
WP_000007423.1	H	hemA	Catalyzes the NADPH-dependent reduction of glutamyl- tRNA(Glu) to glutamate 1-semialdehyde (GSA)
WP_000042455.1	S	Z012_02020	Protein conserved in bacteria
WP_000043121.1	S	pcaC	Carboxymuconolactone decarboxylase family
WP_000047853.1	H	coaD	Reversibly transfers an adenylyl group from ATP to 4'- phosphopantetheine, yielding dephospho-CoA (dPCoA) and pyrophosphate
WP_000049107.1
WP_000073360.1	V	norM	MatE
WP_000076440.1	K		COG0745 Response regulators consisting of a CheY-like receiver domain and a winged-helix DNA-binding domain
WP_000093118.1	P	zur	Belongs to the Fur family
WP_000105718.1	P	tusD	DsrE/DsrF-like family
WP_000106446.1	F	carA	Belongs to the CarA family
WP_000110125.1	S		Protein of unknown function DUF45
WP_000117817.1	J	def2	Removes the formyl group from the N-terminal Met of newly synthesized proteins. Requires at least a dipeptide for an efficient rate of reaction. N-terminal L-methionine is a prerequisite for activity but the enzyme has broad specificity at other positions
WP_000132725.1	S	metP	Belongs to the sodium neurotransmitter symporter (SNF) (TC 2.A.22) family
WP_000135204.1	J	rpsD	One of the primary rRNA binding proteins, it binds directly to 16S rRNA where it nucleates assembly of the body of the 30S subunit
WP_000198631.1	K	rpoA	DNA-dependent RNA polymerase catalyzes the transcription of DNA into RNA using the four ribonucleoside triphosphates as substrates
WP_000211303.1	F	pyrE	Catalyzes the transfer of a ribosyl phosphate group from 5-phosphoribose 1-diphosphate to orotate, leading to the formation of orotidine monophosphate (OMP)
WP_000232533.1
WP_000246374.1	J		structural constituent of ribosome
WP_000248027.1	S	MA20_44640	Protein of unknown function (DUF1285)
WP_000269799.1	T	algZ	Histidine kinase
WP_000338780.1	H	folB	Catalyzes the conversion of 7,8-dihydroneopterin to 6- hydroxymethyl-7,8-dihydropterin
WP_000345069.1	G	IV02_10655	COG0477 Permeases of the major facilitator superfamily
WP_000424060.1	C	atpE	F(1)F(0) ATP synthase produces ATP from ADP in the presence of a proton or sodium gradient. F-type ATPases consist of two structural domains, F(1) containing the extramembraneous catalytic core and F(0) containing the membrane proton channel, linked together by a central stalk and a peripheral stalk. During catalysis, ATP synthesis in the catalytic domain of F(1) is coupled via a rotary mechanism…
WP_000477151.1	NU	fimT	Type II transport protein GspH
WP_000494374.1	KQ		Transcriptional regulator
WP_000550442.1	S	yfcM	Elongation factor P hydroxylase
WP_000557460.1	M		Peptidase family M23
WP_000587649.1	O		Thioredoxin
WP_000601379.1	D	mreB	Rod shape-determining protein MreB
WP_000636493.1	H	pdxA	Catalyzes the NAD(P)-dependent oxidation of 4- (phosphohydroxy)-L-threonine (HTP) into 2-amino-3-oxo-4- (phosphohydroxy)butyric acid which spontaneously decarboxylates to form 3-amino-2-oxopropyl phosphate (AHAP)
WP_000668777.1	S		Intracellular septation protein A
WP_000821671.1	S	rapZ	Displays ATPase and GTPase activities
WP_000833672.1	C	sdhD	Succinate dehydrogenase hydrophobic membrane anchor subunit
WP_000881924.1	P		Binding-protein-dependent transport system inner membrane component
WP_000897689.1
WP_000933374.1	I		Phosphate acyltransferases
WP_000966086.1	I	maoC	N-terminal half of MaoC dehydratase
WP_000994655.1	S	yceA	Belongs to the UPF0176 family
WP_001011094.1	F	pgk	Belongs to the phosphoglycerate kinase family
WP_001026795.1	K	cueR	helix_turn_helix, mercury resistance
WP_001040166.1	J	rpsK	Located on the platform of the 30S subunit, it bridges several disparate RNA helices of the 16S rRNA. Forms part of the Shine-Dalgarno cleft in the 70S ribosome
WP_001054522.1	K	rho	Facilitates transcription termination by a mechanism that involves Rho binding to the nascent RNA, activation of Rho's RNA-dependent ATPase activity, and release of the mRNA from the DNA template
WP_001074624.1	J	rpsN	Binds 16S rRNA, required for the assembly of 30S particles and may also be responsible for determining the conformation of the 16S rRNA at the A site
WP_001089197.1	K	lrp2	helix_turn_helix ASNC type
WP_001091952.1	S		Glyoxalase-like domain
WP_001096694.1	J	rplA	Binds directly to 23S rRNA. The L1 stalk is quite mobile in the ribosome, and is involved in E site tRNA release
WP_001123235.1	K		Acetyltransferase (GNAT) domain
WP_001133556.1	M	gutQ	Arabinose 5-phosphate isomerase
WP_001138055.1	J	rpsG	One of the primary rRNA binding proteins, it binds directly to 16S rRNA where it nucleates assembly of the head domain of the 30S subunit. Is located at the subunit interface close to the decoding center, probably blocks exit of the E-site tRNA
WP_001138319.1	K	hutC	UTRA
WP_001169535.1	Q	ydcO	Benzoate membrane transport protein
WP_001170994.1	J	bamE	Part of the outer membrane protein assembly complex, which is involved in assembly and insertion of beta-barrel proteins into the outer membrane
WP_001180513.1	S	rhtA	EamA-like transporter family
WP_001196539.1	J	def	Removes the formyl group from the N-terminal Met of newly synthesized proteins. Requires at least a dipeptide for an efficient rate of reaction. N-terminal L-methionine is a prerequisite for activity but the enzyme has broad specificity at other positions
WP_001206799.1	E	serB	phosphoserine phosphatase
WP_001249781.1	K	yqjI	Transcriptional regulator PadR-like family
WP_001250044.1	C	qoxA	COX Aromatic Rich Motif
WP_001284758.1	E	glnA	glutamine synthetase
WP_001984516.1
WP_002017269.1
WP_002027108.1	C	sdhC	succinate dehydrogenase
WP_002047990.1	S	VY92_06375	Putative bacterial lipoprotein (DUF799)
WP_002058121.1	K	soxR	helix_turn_helix, mercury resistance
WP_004739177.1	S		Serine aminopeptidase, S33
WP_005132463.1	S	rhtA	EamA-like transporter family
WP_010590619.1	K		LysR substrate binding domain
WP_031222685.1
WP_031960981.1	S	ybgI	NIF3 (NGG1p interacting factor 3)
WP_031963921.1	M	galU	UTP-glucose-1-phosphate uridylyltransferase
WP_031976933.1	S		SnoaL-like domain
WP_031999349.1	U	emrE	Small Multidrug Resistance protein
WP_045899867.1	E	hyuE	Asp/Glu/Hydantoin racemase
WP_045900097.1	M		macromolecule glycosylation
WP_045900362.1	S	MA20_36165	HAD-hyrolase-like
WP_045900454.1	S		Protein of unknown function (DUF4256)
WP_045900496.1	M	mexE	Barrel-sandwich domain of CusB or HlyD membrane-fusion
WP_045901154.1	S		Alpha/beta hydrolase family
WP_045901485.1	S		Uncharacterized protein conserved in bacteria (DUF2237)
WP_047479630.1	M		COG3209 Rhs family protein
WP_047479703.1	K	yybR	HxlR-like helix-turn-helix
WP_047479736.1	S		Protein of unknown function (DUF2846)
WP_047479842.1	S	fghA	Serine hydrolase involved in the detoxification of formaldehyde
WP_047479935.1	H	birA	Biotin/lipoate A/B protein ligase family
WP_047479955.1	J	rluD	Responsible for synthesis of pseudouridine from uracil
WP_047480131.1	S	ycfP	Uncharacterised protein family (UPF0227)
WP_047480595.1	E	rhtC_2	LysE type translocator
WP_047480747.1	I	azoR	Catalyzes the reductive cleavage of azo bond in aromatic azo compounds to the corresponding amines. Requires NADH, but not NADPH, as an electron donor for its activity
WP_047481386.1	O	xdhC	XdhC and CoxI family
WP_047481917.1	EG	MA20_23245	EamA-like transporter family
WP_047482061.1	EG		COG0697 Permeases of the drug metabolite transporter (DMT) superfamily
WP_079269670.1
WP_079378455.1	K		transcriptional regulator

## Sheet: S group Down
Query	COG	Gene	Description of products of genes downregulated in the S group
WP_000003113.1	S		Alpha/beta hydrolase family
WP_000015971.1	E		LysE type translocator
WP_000018346.1	J	rsmH	Specifically methylates the N4 position of cytidine in position 1402 (C1402) of 16S rRNA
WP_000035257.1	M		Glycosyl transferase family 21
WP_000065579.1	O	groS	Binds to Cpn60 in the presence of Mg-ATP and suppresses the ATPase activity of the latter
WP_000073454.1	F	rutG	Permease family
WP_000075183.1	P	phoU	Plays a role in the regulation of phosphate uptake
WP_000102721.1	C	nfuA	Involved in iron-sulfur cluster biogenesis. Binds a 4Fe- 4S cluster, can transfer this cluster to apoproteins, and thereby intervenes in the maturation of Fe S proteins. Could also act as a scaffold chaperone for damaged Fe S proteins
WP_000111464.1	T		HPP family
WP_000128749.1	G	gpmI	Catalyzes the interconversion of 2-phosphoglycerate and 3-phosphoglycerate
WP_000132115.1	IQ		KR domain
WP_000135428.1	IQ		Enoyl-(Acyl carrier protein) reductase
WP_000154076.1	P	mrpF	Multiple resistance and pH regulation protein F (MrpF / PhaF)
WP_000166965.1	K	betI	Repressor involved in choline regulation of the bet genes
WP_000171258.1	L	alkB	2OG-Fe(II) oxygenase superfamily
WP_000183289.1	P	ssuB	Part of the ABC transporter complex SsuABC involved in aliphatic sulfonates import. Responsible for energy coupling to the transport system
WP_000203217.1	K	crp	helix_turn_helix, cAMP Regulatory protein
WP_000218807.1
WP_000256752.1	P		Flavin-binding monooxygenase-like
WP_000258957.1	S	Z012_08985	TPM domain
WP_000268346.1	J	trmH	SpoU rRNA Methylase family
WP_000336554.1	S	yafJ	glutamine amidotransferase
WP_000366384.1	I	dehH1_2	Serine aminopeptidase, S33
WP_000398504.1	I		3-hydroxyacyl-CoA dehydrogenase, C-terminal domain
WP_000423653.1	S	MA20_41470	Protein of unknown function (DUF815)
WP_000526259.1	P	nhaP	Sodium/hydrogen exchanger family
WP_000546629.1	NU	pilV	type IV pilus modification protein PilV
WP_000572397.1	E	aroF	Stereospecific condensation of phosphoenolpyruvate (PEP) and D-erythrose-4-phosphate (E4P) giving rise to 3-deoxy-D- arabino-heptulosonate-7-phosphate (DAHP)
WP_000606428.1	J	frr	Responsible for the release of ribosomes from messenger RNA at the termination of protein biosynthesis. May increase the efficiency of translation by recycling ribosomes from one round of translation to another
WP_000611178.1	O	glnD	Modifies, by uridylylation and deuridylylation, the PII regulatory proteins (GlnB and homologs), in response to the nitrogen status of the cell that GlnD senses through the glutamine level. Under low glutamine levels, catalyzes the conversion of the PII proteins and UTP to PII-UMP and PPi, while under higher glutamine levels, GlnD hydrolyzes PII-UMP to PII and UMP (deuridylylation). Thus, control…
WP_000633123.1	M		Outer membrane efflux protein
WP_000667412.1	M	mrcB	Cell wall formation. Synthesis of cross-linked peptidoglycan from the lipid intermediates. The enzyme has a penicillin-insensitive transglycosylase N-terminal domain (formation of linear glycan strands) and a penicillin-sensitive transpeptidase C-terminal domain (cross-linking of the peptide subunits)
WP_000670572.1	S	bepA	Functions as both a chaperone and a metalloprotease. Maintains the integrity of the outer membrane by promoting either the assembly or the elimination of outer membrane proteins, depending on their folding state
WP_000713961.1	S	VY92_06350	Belongs to the pirin family
WP_000737567.1	O	dsbA	Thiol disulfide interchange protein
WP_000738477.1	NU		Fimbrial protein
WP_000761577.1
WP_000765233.1	S		Metallo-beta-lactamase superfamily
WP_000830716.1	U		hemolysin activation secretion protein
WP_000843079.1	K	yafC	LysR substrate binding domain
WP_000880863.1	S	yeaL	Protein of unknown function (DUF441)
WP_000887362.1	K	argP	LysR substrate binding domain
WP_000905538.1	E	hisA	1-(5-phosphoribosyl)-5- (5-phosphoribosylamino)methylideneamino imidazole-4-carboxamide isomerase
WP_000939107.1	M		tail specific protease
WP_000957990.1	D	parA	Anion-transporting ATPase
WP_000987604.1	V	acrF	MMPL family
WP_001011052.1	K	cbl	Transcriptional regulator
WP_001046931.1
WP_001050705.1	S		Cysteine-rich secretory protein family
WP_001076479.1	D	scpA	Participates in chromosomal partition during cell division. May act via the formation of a condensin-like complex containing Smc and ScpB that pull DNA away from mid-cell into both cell halves
WP_001078584.1	J	rsmE	Specifically methylates the N3 position of the uracil ring of uridine 1498 (m3U1498) in 16S rRNA. Acts on the fully assembled 30S ribosomal subunit
WP_001084867.1	F	pyrC	Catalyzes the reversible cyclization of carbamoyl aspartate to dihydroorotate
WP_001088962.1
WP_001095768.1	S	hchA	DJ-1/PfpI family
WP_001100694.1	C	ydgI	Nitroreductase family
WP_001162376.1	G		Histidine phosphatase superfamily (branch 1)
WP_001183413.1	O	msrA	Has an important function as a repair enzyme for proteins that have been inactivated by oxidation. Catalyzes the reversible oxidation-reduction of methionine sulfoxide in proteins to methionine
WP_001198160.1	S	sanA	DUF218 domain
WP_001277431.1	K		Transcriptional regulator
WP_001292948.1	L	nudC	NADH pyrophosphatase zinc ribbon domain
WP_001981590.1	P	sbp	sulfate ABC transporter
WP_001984199.1	J	dusC	Catalyzes the synthesis of 5,6-dihydrouridine (D), a modified base found in the D-loop of most tRNAs, via the reduction of the C5-C6 double bond in target uridines. Specifically modifies U16 in tRNAs
WP_002014361.1	EGP	araJ	Major facilitator Superfamily
WP_002019686.1
WP_002057402.1	U	fcy21	Permease for cytosine/purines, uracil, thiamine, allantoin
WP_002059113.1	M	lpxB	Condensation of UDP-2,3-diacylglucosamine and 2,3- diacylglucosamine-1-phosphate to form lipid A disaccharide, a precursor of lipid A, a phosphorylated glycolipid that anchors the lipopolysaccharide to the outer membrane of the cell
WP_004746743.1	K		Arabinose-binding domain of AraC transcription regulator, N-term
WP_005119692.1	T	baeS	HAMP (Histidine kinases, Adenylyl cyclases, Methyl binding proteins, Phosphatases) domain
WP_017816691.1	M	bamD	Part of the outer membrane protein assembly complex, which is involved in assembly and insertion of beta-barrel proteins into the outer membrane
WP_023897236.1	L	dnaG	RNA polymerase that catalyzes the synthesis of short RNA molecules used as primers for DNA polymerase during DNA replication
WP_031950501.1	NU	pilM	Type IV pilus assembly protein PilM;
WP_031963174.1	G	icaB	Polysaccharide deacetylase
WP_032001095.1
WP_032061315.1	C	ntaA_1	Luciferase-like monooxygenase
WP_033852913.1	S	hcaG	Tannase and feruloyl esterase
WP_045899976.1	S	ant	Domain of unknown function (DUF4111)
WP_045900011.1	E	tyrB	Aminotransferase class I and II
WP_045900027.1	K	tetR7	Bacterial regulatory proteins, tetR family
WP_045900452.1	K	pfiT	Bacterial regulatory proteins, tetR family
WP_045900694.1	L	rnhB	Endonuclease that specifically degrades the RNA of RNA- DNA hybrids
WP_045901541.1	O	ppiD	Peptidylprolyl isomerase
WP_045901784.1	K		SMP-30/Gluconolaconase/LRE-like region
WP_045902093.1	C	nfnB	nitroreductase
WP_045902100.1	J	rluA	COG0564 Pseudouridylate synthases, 23S RNA-specific
WP_045902229.1	P	phoD	PhoD-like phosphatase
WP_045902249.1	K		helix_turn_helix, arabinose operon control protein
WP_045902320.1	S	ydfG	Belongs to the short-chain dehydrogenases reductases (SDR) family
WP_047479431.1	S	yheS	COG0488 ATPase components of ABC transporters with duplicated ATPase domains
WP_047479487.1	H	nadC	Belongs to the NadC ModD family
WP_047479692.1
WP_047479789.1	S		Protein of unknown function (DUF3298)
WP_047480089.1	G	IV02_09720	Transketolase, pyrimidine binding domain
WP_047480153.1	UW		Coiled stalk of trimeric autotransporter adhesin
WP_047480156.1	M	plpD	SmpA / OmlA family
WP_047480871.1	S		Protein of unknown function (DUF4236)
WP_047481003.1	H	fruK	Belongs to the carbohydrate kinase PfkB family
WP_047481032.1	H	moeA	Probable molybdopterin binding domain
WP_047481323.1	E	pepD	Peptidase family M20/M25/M40
WP_047481332.1	I		Acyl-CoA dehydrogenase, C-terminal domain
WP_047481433.1	Q		AMP-binding enzyme C-terminal domain
WP_047481606.1	S		Pfam Methyltransferase
WP_047481785.1	M	nolF	Belongs to the membrane fusion protein (MFP) (TC 8.A.1) family
WP_047481909.1	M	tonB3	Gram-negative bacterial TonB protein C-terminal
WP_047482066.1	M	cfa	Mycolic acid cyclopropane synthetase
WP_047482137.1	I		Membrane
WP_050598659.1
WP_079267144.1	G	yliI	Glucose / Sorbosone dehydrogenase
WP_079267361.1	E	aroP	Amino acid permease
WP_079378425.1

## Sheet: T group Up
Query	COG	Gene	Description of products of genes upregulated in the T group
WP_000037059.1	K		Bacterial regulatory proteins, tetR family
WP_000053785.1	G		Sugar (and other) transporter
WP_000110649.1	P	gltJ	Binding-protein-dependent transport system inner membrane component
WP_000145303.1	M		Transglycosylase SLT domain
WP_000201544.1	S		Protein of unknown function (DUF3108)
WP_000236000.1	H	ackA	Catalyzes the formation of acetyl phosphate from acetate and ATP. Can also catalyze the reverse reaction
WP_000312749.1	FG	hit	Scavenger mRNA decapping enzyme C-term binding
WP_000375416.1	K		LysR substrate binding domain
WP_000379020.1	M	dgkA	Recycling of diacylglycerol produced during the turnover of membrane phospholipid
WP_000595310.1
WP_000626177.1	S		Predicted metal-dependent hydrolase
WP_000717015.1	S		Uncharacterized protein conserved in bacteria (DUF2147)
WP_000790118.1	EGP	cmr	Major facilitator Superfamily
WP_000844343.1	O	ate	May conjugate Arg from its aminoacyl-tRNA to the N- termini of proteins containing an N-terminal aspartate or glutamate
WP_000889270.1
WP_000894500.1	S	yqiC	Membrane fusogenic activity
WP_000916029.1	S		protein conserved in bacteria
WP_000922240.1	V	Z012_08870	ABC transporter
WP_000932369.1	E	proC	Catalyzes the reduction of 1-pyrroline-5-carboxylate (PCA) to L-proline
WP_001043188.1
WP_001047619.1	K		Transcriptional regulator
WP_001070631.1	K		AraC-binding-like domain
WP_001149998.1
WP_001178068.1	D	cpoB	TolA binding protein trimerisation
WP_001246675.1	I		Polyketide cyclase / dehydrase and lipid transport
WP_001248745.1
WP_002014284.1	T	yfiN	Periplasmic sensor domain
WP_002037182.1	E	yrfG	Haloacid dehalogenase-like hydrolase
WP_002156379.1
WP_045543760.1	J	trpS	Belongs to the class-I aminoacyl-tRNA synthetase family
WP_045544155.1	EGP	pcaK	Uncharacterised MFS-type transporter YbfB
WP_045900608.1	K		Bacterial regulatory proteins, tetR family
WP_045901259.1	E	MA20_22020	LysE type translocator
WP_045902052.1	V		Beta-lactamase enzyme family
WP_045902252.1	K		PaaX-like protein C-terminal domain
WP_047479457.1	S	ltrA	Bacterial low temperature requirement A protein (LtrA)
WP_047480792.1	S		Domain of unknown function (DUF4882)
WP_047480943.1	S	romA	Beta-lactamase superfamily domain
WP_047481777.1	E	dapE	Catalyzes the hydrolysis of N-succinyl-L,L- diaminopimelic acid (SDAP), forming succinate and LL-2,6- diaminoheptanedioate (DAP), an intermediate involved in the bacterial biosynthesis of lysine and meso-diaminopimelic acid, an essential component of bacterial cell walls
WP_047482007.1	E		Belongs to the peptidase S1B family
WP_052109206.1	S	yigE	Phosphodiester glycosidase

## Sheet: T group Down
Query	COG	Gene	Description of products of genes downregulated in the T group
WP_000016592.1	H	bioD	Catalyzes a mechanistically unusual reaction, the ATP- dependent insertion of CO2 between the N7 and N8 nitrogen atoms of 7,8-diaminopelargonic acid (DAPA) to form an ureido ring
WP_000020708.1	S	impA	ImpA, N-terminal, type VI secretion system
WP_000051224.1	T	bolA	Belongs to the BolA IbaG family
WP_000064213.1	H	ubiE	Methyltransferase required for the conversion of demethylmenaquinol (DMKH2) to menaquinol (MKH2) and the conversion of 2-polyprenyl-6-methoxy-1,4-benzoquinol (DDMQH2) to 2- polyprenyl-3-methyl-6-methoxy-1,4-benzoquinol (DMQH2)
WP_000064289.1	P	katG	Bifunctional enzyme with both catalase and broad- spectrum peroxidase activity
WP_000071984.1	F	purM	Phosphoribosylformylglycinamidine cyclo-ligase
WP_000083115.1	O	cysT	Binding-protein-dependent transport system inner membrane component
WP_000090021.1	S	yjjK	COG0488 ATPase components of ABC transporters with duplicated ATPase domains
WP_000102943.1	S		Nitroreductase family
WP_000114637.1	C	sucD	Succinyl-CoA synthetase functions in the citric acid cycle (TCA), coupling the hydrolysis of succinyl-CoA to the synthesis of either ATP or GTP and thus represents the only step of substrate-level phosphorylation in the TCA. The alpha subunit of the enzyme binds the substrates coenzyme A and phosphate, while succinate binding and nucleotide specificity is provided by the beta subunit
WP_000128703.1	V	emrA	HlyD membrane-fusion protein of T1SS
WP_000130927.1	H	ygdL	COG1179 Dinucleotide-utilizing enzymes involved in molybdopterin and thiamine biosynthesis family 1
WP_000146423.1	C	yeaX	2Fe-2S iron-sulfur cluster binding domain
WP_000155519.1	S		Uncharacterized protein conserved in bacteria (DUF2059)
WP_000492048.1	FG	MA20_21960	HIT domain
WP_000528170.1	S		YheO-like PAS domain
WP_000555491.1	S		overlaps another CDS with the same product name
WP_000669945.1	M		Parallel beta-helix repeats
WP_000724606.1	S		Lysozyme inhibitor LprI
WP_000753362.1	S	yrkL	Flavodoxin-like fold
WP_000837758.1	M		Gram-negative bacterial TonB protein C-terminal
WP_000856678.1	J	rimO	Catalyzes the methylthiolation of an aspartic acid residue of ribosomal protein S12
WP_000919363.1	S	yraP	BON domain
WP_000993136.1	I	tesB	Acyl-CoA thioesterase
WP_000996083.1	K	pcaR	helix_turn_helix isocitrate lyase regulation
WP_001018361.1	K		Bacterial transcriptional regulator
WP_001028494.1	CP	nirD	Rieske-like [2Fe-2S] domain
WP_001059825.1	E		FAD dependent oxidoreductase
WP_001143890.1	P	sodC	Destroys radicals which are normally produced within the cells and which are toxic to biological systems
WP_001153627.1	K	csiR_1	FCD
WP_001165468.1	C	pntAA	Alanine dehydrogenase/PNT, N-terminal domain
WP_001173275.1	P	ssuA	ABC transporter substrate-binding protein
WP_001174793.1	M	oprM	Outer membrane efflux protein
WP_001212536.1	G	adeT	TRAP-type C4-dicarboxylate transport system periplasmic component
WP_001212600.1	P	cysP	sulfate ABC transporter
WP_001230727.1	K		LysR substrate binding domain
WP_001238909.1	P	pstS	PBP superfamily domain
WP_001256565.1	S		Ion channel
WP_001271636.1	S	moxR	AAA domain (Cdc48 subfamily)
WP_001278262.1	H	nadA	Catalyzes the condensation of iminoaspartate with dihydroxyacetone phosphate to form quinolinate
WP_001286662.1	O	ftsH	Acts as a processive, ATP-dependent zinc metallopeptidase for both cytoplasmic and membrane proteins. Plays a role in the quality control of integral membrane proteins
WP_005128129.1	T		Motif C-terminal to PAS motifs (likely to contribute to PAS structural domain)
WP_023897359.1	E	YPO1315	haloacid dehalogenase-like hydrolase
WP_029424106.1	F	thrB	Belongs to the pseudomonas-type ThrB family
WP_031976510.1	C	mmsA	Aldehyde dehydrogenase family
WP_031993539.1	P	vanA	Rieske [2Fe-2S] domain
WP_032059476.1	K	ripA_2	AraC-like ligand binding domain
WP_033852483.1	F	nrdA	Provides the precursors necessary for DNA synthesis. Catalyzes the biosynthesis of deoxyribonucleotides from the corresponding ribonucleotides
WP_045544344.1	EGP	benK	Major facilitator Superfamily
WP_045899602.1	S		Uncharacterized protein conserved in bacteria (DUF2094)
WP_045899966.1	M	oprC	TonB dependent receptor
WP_045900722.1	S		outer membrane porin, OprD family
WP_045900904.1	M	murI	Provides the (R)-glutamate required for cell wall biosynthesis
WP_045901166.1
WP_045902050.1	S		Uncharacterized protein conserved in bacteria (DUF2147)
WP_045902054.1	S		Phage late control gene D protein (GPD)
WP_045902108.1	E	puuA	Glutamine synthetase, catalytic domain
WP_047479638.1	U	pilC	Type II secretion system (T2SS), protein F
WP_047479904.1	C	fpr	Oxidoreductase NAD-binding domain
WP_047480008.1	E	thiO	FAD dependent oxidoreductase
WP_047480094.1	E	dsdA	Belongs to the serine threonine dehydratase family. DsdA subfamily
WP_047480108.1	Q		D-alanine [D-alanyl carrier protein] ligase activity
WP_047480171.1	C		NADH:flavin oxidoreductase / NADH oxidase family
WP_047480377.1	E	sdaA	Serine dehydratase beta chain
WP_047480454.1	I	pcaF	Belongs to the thiolase family
WP_047480563.1	I		Acyl-CoA dehydrogenase, C-terminal domain
WP_047480652.1	U	gspK	Type II secretion system (T2SS), protein K
WP_047480883.1	E	metF	Methylene-tetrahydrofolate reductase C terminal
WP_047481073.1	D	sca1	Phage-related minor tail protein
WP_047481087.1	N		domain, Protein
WP_047481097.1
WP_047481665.1	S		Amidohydrolase
WP_047482058.1
WP_073299985.1	H	ydiA	Bifunctional serine threonine kinase and phosphorylase involved in the regulation of the phosphoenolpyruvate synthase (PEPS) by catalyzing its phosphorylation dephosphorylation

## Sheet: A. baumannii MAR002 genome
Query	COG	Gene	Description of products of A. baumannii MAR002 genes
WP_000335558.1	tyrS	J	Catalyzes the attachment of tyrosine to tRNA(Tyr) in a two-step reaction tyrosine is first activated by ATP to form Tyr- AMP and then transferred to the acceptor end of tRNA(Tyr)
WP_001274576.1	anmK	F	Catalyzes the specific phosphorylation of 1,6-anhydro-N- acetylmuramic acid (anhMurNAc) with the simultaneous cleavage of the 1,6-anhydro ring, generating MurNAc-6-P. Is required for the utilization of anhMurNAc either imported from the medium or derived from its own cell wall murein, and thus plays a role in cell wall recycling
WP_000366384.1	dehH1_2	I	Serine aminopeptidase, S33
WP_000993572.1	erpA	C	Iron-sulfur cluster insertion protein ErpA
WP_001212536.1	adeT	G	TRAP-type C4-dicarboxylate transport system periplasmic component
WP_031977022.1		G	TRAP-type C4-dicarboxylate transport system periplasmic component
WP_000746542.1		G	TRAP-type C4-dicarboxylate transport system periplasmic component
WP_047479431.1	yheS	S	COG0488 ATPase components of ABC transporters with duplicated ATPase domains
WP_001009198.1	dedA	S	SNARE associated Golgi protein
WP_000987632.1	cybC	C	Cytochrome b562
WP_000093729.1	gyrB	L	A type II topoisomerase that negatively supercoils closed circular double-stranded (ds) DNA in an ATP-dependent manner to modulate DNA topology and maintain chromosomes in an underwound state. Negative supercoiling favors strand separation, and DNA replication, transcription, recombination and repair, all of which involve strand separation. Also able to catalyze the interconversion of other topol…
WP_045900637.1	recF	L	it is required for DNA replication and normal SOS inducibility. RecF binds preferentially to single-stranded, linear DNA. It also seems to bind ATP
WP_169518437.1	dnaN	L	Confers DNA tethering and processivity to DNA polymerases and other proteins. Acts as a clamp, forming a ring around DNA (a reaction catalyzed by the clamp-loading complex) which diffuses in an ATP-independent manner freely and bidirectionally along dsDNA. Initially characterized for its ability to contact the catalytic subunit of DNA polymerase III (Pol III), a complex, multichain enzyme respons…
15	dnaN	L	Confers DNA tethering and processivity to DNA polymerases and other proteins. Acts as a clamp, forming a ring around DNA (a reaction catalyzed by the clamp-loading complex) which diffuses in an ATP-independent manner freely and bidirectionally along dsDNA. Initially characterized for its ability to contact the catalytic subunit of DNA polymerase III (Pol III), a complex, multichain enzyme respons…
WP_000964771.1	dnaA	L	it binds specifically double-stranded DNA at a 9 bp consensus (dnaA box) 5'-TTATC CA A CA A-3'. DnaA binds to ATP and to acidic phospholipids
WP_000831329.1	rpmH	J	Belongs to the bacterial ribosomal protein bL34 family
WP_001240377.1	rnpA	J	RNaseP catalyzes the removal of the 5'-leader sequence from pre-tRNA to produce the mature 5'-terminus. It can also cleave other RNA substrates such as 4.5S RNA. The protein component plays an auxiliary but essential role in vivo by binding to the 5'-leader sequence and broadening the substrate specificity of the ribozyme
WP_000251652.1	yidD	S	Could be involved in insertion of integral membrane proteins into the membrane
WP_001188089.1	yidC	U	Required for the insertion and or proper folding and or complex formation of integral membrane proteins into the membrane. Involved in integration of membrane proteins that insert both dependently and independently of the Sec translocase complex, as well as at least some lipoproteins. Aids folding of multispanning membrane proteins
WP_002067458.1	mnmE	J	Exhibits a very high intrinsic GTPase hydrolysis rate. Involved in the addition of a carboxymethylaminomethyl (cmnm) group at the wobble position (U34) of certain tRNAs, forming tRNA- cmnm(5)s(2)U34
WP_000018128.1	rcnR	S	Metal-sensitive transcriptional repressor
WP_079378421.1	czcD2	P	Cation efflux family
WP_000592160.1	dsbC	O	Required for disulfide bond formation in some periplasmic proteins. Acts by transferring its disulfide bond to other proteins and is reduced in the process
WP_000269732.1		S	Transglycosylase associated protein
WP_000214980.1	hpt	F	Belongs to the purine pyrimidine phosphoribosyltransferase family
WP_045900633.1	guaD	F	Amidohydrolase family
WP_045900631.1		P	Rieske [2Fe-2S] domain
WP_002061472.1	ygiC	E	Glutathionylspermidine synthase preATP-grasp
WP_001256727.1
WP_079378422.1	GBS0088	S	Nucleotidyltransferase
WP_031977029.1	alx	P	Integral membrane protein TerC family
WP_000051338.1	ybjG	I	Acid phosphatase homologues
WP_047479457.1	ltrA	S	Bacterial low temperature requirement A protein (LtrA)
WP_046879396.1	murC	M	Reutilizes the intact tripeptide L-alanyl-gamma-D- glutamyl-meso-diaminopimelate by linking it to UDP-N- acetylmuramate
WP_002018080.1		S	Putative member of DMT superfamily (DUF486)
WP_000994663.1	purE	F	Catalyzes the conversion of N5-carboxyaminoimidazole ribonucleotide (N5-CAIR) to 4-carboxy-5-aminoimidazole ribonucleotide (CAIR)
WP_045900628.1	purK	F	Catalyzes the ATP-dependent conversion of 5- aminoimidazole ribonucleotide (AIR) and HCO(3)(-) to N5- carboxyaminoimidazole ribonucleotide (N5-CAIR)
WP_171126841.1	mltB	M	Lytic murein transglycosylase
WP_001985173.1
41		S	Zinc-dependent metalloprotease
42		S	Zinc-dependent metalloprotease
WP_001062605.1	dnaK	O	Heat shock 70 kDa protein
WP_001262789.1	grpE	O	Participates actively in the response to hyperosmotic and heat shock by preventing the aggregation of stress-denatured proteins, in association with DnaK and GrpE. It is the nucleotide exchange factor for DnaK and may function as a thermosensor. Unfolded proteins bind initially to DnaJ
45		K	LysR substrate binding domain
WP_000765233.1		S	Metallo-beta-lactamase superfamily
WP_000733015.1
WP_002047519.1
WP_000123589.1	estA	I	Steryl acetyl hydrolase
WP_001194327.1	ppiA	M	PPIases accelerate the folding of proteins. It catalyzes the cis-trans isomerization of proline imidic peptide bonds in oligopeptides
WP_002063347.1		S	Ankyrin repeats (many copies)
WP_047479467.1		S	NADPH-dependent FMN reductase
WP_000136002.1	fkpB	G	Peptidyl-prolyl cis-trans
WP_001133879.1	lspA	MU	This protein specifically catalyzes the removal of signal peptides from prolipoproteins
WP_016654453.1	ileS	J	amino acids such as valine, to avoid such errors it has two additional distinct tRNA(Ile)-dependent editing activities. One activity is designated as 'pretransfer' editing and involves the hydrolysis of activated Val-AMP. The other activity is designated 'posttransfer' editing and involves deacylation of mischarged Val-tRNA(Ile)
WP_000771825.1	ribF	H	Belongs to the ribF family
WP_000828361.1	mae1	P	Voltage-dependent anion channel
WP_047479470.1	pfs	F	Phosphorylase superfamily
WP_001186827.1	rutR	K	YcdC-like protein, C-terminal region
WP_000183289.1	ssuB	P	Part of the ABC transporter complex SsuABC involved in aliphatic sulfonates import. Responsible for energy coupling to the transport system
WP_000031022.1	ssuC	P	Binding-protein-dependent transport system inner membrane component
WP_000689552.1	ssuD	C	Catalyzes the desulfonation of aliphatic sulfonates
WP_004748614.1	ssuA	P	ABC transporter, phosphonate, periplasmic substrate-binding protein
WP_001173275.1	ssuA	P	ABC transporter substrate-binding protein
WP_001142457.1	argA	E	Belongs to the acetyltransferase family. ArgA subfamily
WP_000724539.1	yohN	S	Nickel/cobalt transporter regulator
WP_152562442.1	yohN	S	Nickel/cobalt transporter regulator
WP_000877608.1		IQ	KR domain
WP_000973871.1	gph	S	Phosphoglycolate phosphatase
WP_000080759.1	ubiG	H	O-methyltransferase that catalyzes the 2 O-methylation steps in the ubiquinone biosynthetic pathway
WP_000737567.1	dsbA	O	Thiol disulfide interchange protein
WP_045900027.1	tetR7	K	Bacterial regulatory proteins, tetR family
WP_000027529.1	desT	K	Bacterial regulatory proteins, tetR family
WP_039209510.1		C	Oxidoreductase NAD-binding domain
WP_086223964.1	desA3	I	Fatty acid desaturase
WP_001217232.1	rph	J	Phosphorolytic exoribonuclease that removes nucleotide residues following the -CCA terminus of tRNA and adds nucleotides to the ends of RNA molecules by using nucleoside diphosphates as substrates
WP_047479485.1		M	Phosphoesterase family
WP_000938939.1
WP_047479487.1	nadC	H	Belongs to the NadC ModD family
WP_000810005.1	ampD	V	Ami_2
WP_171059192.1	murJ	S	Involved in peptidoglycan biosynthesis. Transports lipid-linked peptidoglycan precursors from the inner to the outer leaflet of the cytoplasmic membrane
WP_086222320.1	fkpB	M	peptidyl-prolyl cis-trans isomerase
WP_045900020.1	fkpA	O	Domain amino terminal to FKBP-type peptidyl-prolyl isomerase
WP_001075373.1	wzc	D	G-rich domain on putative tyrosine kinase
WP_001159774.1	wzb	T	Belongs to the low molecular weight phosphotyrosine protein phosphatase family
WP_000872600.1	wza	M	Polysaccharide biosynthesis/export protein
WP_001175095.1	vipA	M	Belongs to the UDP-glucose GDP-mannose dehydrogenase family
WP_001083065.1	wbpP	M	3-beta hydroxysteroid dehydrogenase/isomerase family
89	amrA	S	Polysaccharide biosynthesis protein
WP_045900017.1	wbpT	M	Glycosyltransferase Family 4
WP_029642250.1		M	Glycosyl transferases group 1
WP_000919784.1	epsL	M	Bacterial sugar transferase
WP_001064861.1		S	maltose O-acetyltransferase activity
WP_000935234.1	btrR	E	Belongs to the DegT DnrJ EryC1 family
WP_000721146.1	wbpM	GM	RmlD substrate binding domain
WP_031963921.1	galU	M	UTP-glucose-1-phosphate uridylyltransferase
WP_000686118.1	ugd2	M	Belongs to the UDP-glucose GDP-mannose dehydrogenase family
WP_047479500.1	pgi	G	Belongs to the GPI family
WP_001062902.1	galE	M	UDP-glucose 4-epimerase
WP_000209940.1	manB	G	Phosphoglucomutase/phosphomannomutase, C-terminal domain
WP_170248999.1	lldP	C	L-lactate permease
WP_001222772.1	lldR	K	FCD
WP_000587280.1	lldD	C	Catalyzes the conversion of L-lactate to pyruvate. Is coupled to the respiratory chain
WP_045900012.1	dld	C	Catalyzes the oxidation of D-lactate to pyruvate
WP_045900011.1	tyrB	E	Aminotransferase class I and II
WP_001153627.1	csiR_1	K	FCD
WP_001118922.1	prpB	G	Catalyzes the thermodynamically favored C-C bond cleavage of (2R,3S)-2-methylisocitrate to yield pyruvate and succinate
WP_000097522.1	prpC	C	Belongs to the citrate synthase family
WP_047479505.1	acnD	C	Catalyzes the isomerization of citrate to isocitrate via cis-aconitate
WP_047479508.1
WP_000447804.1		S	Domain of unknown function (DUF4126)
WP_001065615.1		L	Belongs to the Nudix hydrolase family
WP_004843683.1
WP_045900001.1	fabB	I	Catalyzes the condensation reaction of fatty acid synthesis by the addition to an acyl acceptor of two carbons from malonyl-ACP
WP_045899999.1		S	Domain of unknown function (DUF4844)
WP_001063521.1		IQ	Enoyl-(Acyl carrier protein) reductase
WP_000428564.1	yejC	S	Protein of unknown function (DUF1003)
WP_001130514.1	rluA	J	Responsible for synthesis of pseudouridine from uracil
WP_047479515.1		S	Regulator of ribonuclease activity B
WP_000059266.1		S	SnoaL-like domain
WP_152562443.1		P	TonB dependent receptor
WP_045899995.1		S	Protein of unknown function (DUF1624)
WP_001247568.1	lrp	K	Lrp/AsnC ligand binding domain
WP_171126829.1	dadA	C	Oxidative deamination of D-amino acids
WP_047479520.1	alr	E	Catalyzes the interconversion of L-alanine and D- alanine. May also act on other amino acids
WP_014208092.1		J	Endoribonuclease L-PSP
WP_000205436.1	cycA	E	Amino acid permease
WP_000178999.1	cycA	E	Amino acid permease
WP_000861801.1		K	LysR substrate binding domain
WP_047479525.1	mmsA	C	Aldehyde dehydrogenase family
WP_002059313.1	mmsB	I	Belongs to the 3-hydroxyisobutyrate dehydrogenase family
WP_047479528.1	acs-2	I	AMP-binding enzyme C-terminal domain
WP_001160766.1	mmgC	I	Acyl-CoA dehydrogenase, C-terminal domain
WP_047479532.1	fadB1x	I	Belongs to the enoyl-CoA hydratase isomerase family
WP_001091033.1	echA9	I	Enoyl-CoA hydratase/isomerase
WP_001193289.1		EGP	Sugar (and other) transporter
WP_086263473.1	solI	H	Involved in the synthesis of the acyl-homoserine lactone (AHL) signal N-(3-hydroxydodecanoyl)-L-HSL (3-hydroxy-C(12)-HSL or OH-dDHL)
WP_000253662.1		S	Domain of unknown function (DUF4902)
WP_000446790.1		K	Transcriptional activator protein
WP_047479535.1		IQ	AMP-binding enzyme
WP_002000465.1		C	Acyl-CoA dehydrogenase, middle domain
WP_001030690.1		IQ	Phosphopantetheine attachment site
WP_047479540.1	rhiB	Q	Pfam:HxxPF_rpt
WP_045899985.1		GM	Outer membrane lipoprotein-sorting protein
WP_045899983.1		T	Sh3 type 3 domain protein
WP_045899981.1		M	Male sterility protein
WP_161782814.1	acpT	H	4'-phosphopantetheinyl transferase superfamily
WP_000051224.1	bolA	T	Belongs to the BolA IbaG family
WP_000338677.1		S	Invasion gene expression up-regulator, SirB
WP_000957990.1	parA	D	Anion-transporting ATPase
WP_045899978.1
WP_000573143.1	pltP	E	lysine exporter protein (LysE YggA)
WP_000421344.1	dedA	S	SNARE associated Golgi protein
WP_000483007.1		S	DoxX
WP_169518027.1		S	Protein of unknown function (DUF445)
WP_000210750.1	guaA	F	Catalyzes the synthesis of GMP from XMP
WP_045899976.1	ant	S	Domain of unknown function (DUF4111)
WP_001249781.1	yqjI	K	Transcriptional regulator PadR-like family
WP_000809284.1		S	Domain of Unknown Function with PDB structure (DUF3861)
WP_000069626.1	Z012_04450	S	Belongs to the pirin family
WP_000127662.1	XK27_07670	O	OsmC-like protein
WP_000626445.1	gstA	O	Glutathione S-transferase
WP_000467262.1	ftsN	D	Sporulation related domain
WP_001090284.1	argS	J	Arginyl-tRNA synthetase
WP_000623101.1	maeA	C	malate dehydrogenase (decarboxylating) (NAD+) activity
WP_000126807.1		P	Dyp-type peroxidase family
WP_000058354.1	rhtB	E	LysE type translocator
WP_000970832.1	znuB	P	ABC 3 transport family
WP_047479549.1	znuC	P	Part of the ABC transporter complex ZnuABC involved in zinc import. Responsible for energy coupling to the transport system
WP_011858041.1	zur	P	Belongs to the Fur family
WP_161782805.1	znuA	P	Zinc-uptake complex component A periplasmic
WP_000084237.1	atpI	C	ATP synthase I chain
WP_000718586.1	atpB	C	it plays a direct role in the translocation of protons across the membrane
WP_000424060.1	atpE	C	F(1)F(0) ATP synthase produces ATP from ADP in the presence of a proton or sodium gradient. F-type ATPases consist of two structural domains, F(1) containing the extramembraneous catalytic core and F(0) containing the membrane proton channel, linked together by a central stalk and a peripheral stalk. During catalysis, ATP synthesis in the catalytic domain of F(1) is coupled via a rotary mechanism…
WP_001024691.1	atpF	C	Component of the F(0) channel, it forms part of the peripheral stalk, linking F(1) to F(0)
WP_000818995.1	atpH	C	F(1)F(0) ATP synthase produces ATP from ADP in the presence of a proton or sodium gradient. F-type ATPases consist of two structural domains, F(1) containing the extramembraneous catalytic core and F(0) containing the membrane proton channel, linked together by a central stalk and a peripheral stalk. During catalysis, ATP synthesis in the catalytic domain of F(1) is coupled via a rotary mechanism…
WP_001186635.1	atpA	C	Produces ATP from ADP in the presence of a proton gradient across the membrane. The alpha chain is a regulatory subunit
WP_001284971.1	atpG	C	Produces ATP from ADP in the presence of a proton gradient across the membrane. The gamma chain is believed to be important in regulating ATPase activity and the flow of protons through the CF(0) complex
WP_000094481.1	atpD	C	Produces ATP from ADP in the presence of a proton gradient across the membrane. The catalytic sites are hosted primarily by the beta subunits
WP_000224542.1	atpC	C	Produces ATP from ADP in the presence of a proton gradient across the membrane
WP_000757144.1
WP_000194676.1	btuE	O	Glutathione peroxidase
WP_000786954.1		K	helix_turn_helix, arabinose operon control protein
WP_000372838.1	nepI	EGP	Major facilitator Superfamily
WP_152562417.1		K	Bacterial regulatory proteins, tetR family
WP_001994180.1		EG	EamA-like transporter family
WP_000633612.1	tsaC	J	Required for the formation of a threonylcarbamoyl group on adenosine at position 37 (t(6)A37) in tRNAs that read codons beginning with adenine. Catalyzes the conversion of L-threonine, HCO(3)(-) CO(2) and ATP to give threonylcarbamoyl-AMP (TC-AMP) as the acyladenylate intermediate, with the release of diphosphate
WP_032027099.1	dprA	LU	nucleotide-binding protein involved in DNA uptake
WP_000755274.1	lysM	S	LysM domain
WP_001196539.1	def	J	Removes the formyl group from the N-terminal Met of newly synthesized proteins. Requires at least a dipeptide for an efficient rate of reaction. N-terminal L-methionine is a prerequisite for activity but the enzyme has broad specificity at other positions
WP_000231981.1
WP_045899966.1	oprC	M	TonB dependent receptor
WP_000182542.1
WP_047479555.1		S	Uncharacterized protein conserved in bacteria (DUF2236)
WP_001232323.1		K	Bacterial regulatory proteins, tetR family
WP_001159744.1		S	Acetyltransferase (GNAT) domain
WP_171057066.1	cysK	E	Belongs to the cysteine synthase cystathionine beta- synthase family
WP_098729643.1		M	Transglycosylase SLT domain
WP_031379387.1		S	NADPH-dependent FMN reductase
202		S	Protein of unknown function (DUF2938)
WP_000351005.1	soxR	K	helix_turn_helix, mercury resistance
WP_002044789.1		S	Esterase-like activity of phytase
WP_000102049.1	ygiQ	C	UPF0313 protein
WP_000291528.1		S	Protein of unknown function (DUF2726)
WP_000216805.1	IV02_05570	J	Endoribonuclease L-PSP
WP_001226142.1	dinB	L	Poorly processive, error-prone DNA polymerase involved in untargeted mutagenesis. Copies undamaged DNA at stalled replication forks, which arise in vivo from mismatched or misaligned primer ends. These misaligned primers can be extended by PolIV. Exhibits no 3'-5' exonuclease (proofreading) activity. May be involved in translesional synthesis, in conjunction with the beta clamp from PolIII
WP_045900587.1	lyc	M	Glycosyl hydrolases family 25
WP_045900585.1	mdtD	EGP	Major facilitator Superfamily
WP_086225853.1	yvdD	S	Belongs to the LOG family
WP_000575776.1	ytfL	P	Transporter associated domain
WP_047479567.1	Z012_01455	S	SEC-C motif
WP_000927792.1	yicG	S	UPF0126 domain
WP_000366687.1	yceI	EGP	Major facilitator Superfamily
WP_000202262.1	parC	L	Topoisomerase IV is essential for chromosome segregation. It relaxes supercoiled DNA. Performs the decatenation events required during the replication of a circular DNA molecule
WP_000411991.1	fadD	IQ	COG0318 Acyl-CoA synthetases (AMP-forming) AMP-acid ligases II
WP_001187001.1
WP_086222368.1		S	MAPEG family
WP_000122443.1	ppa	C	Catalyzes the hydrolysis of inorganic pyrophosphate (PPi) forming two phosphate ions
WP_045900580.1	oprQ	S	outer membrane porin, OprD family
WP_001985635.1		S	Bacterial protein of unknown function (Gcw_chp)
WP_045900579.1	dapA2	EM	Dihydrodipicolinate synthetase family
WP_000845026.1	fucA_3	G	Class II Aldolase and Adducin N-terminal domain
WP_047479571.1	gabR_1	K	helix_turn_helix gluconate operon transcriptional repressor
WP_047479574.1	comM	O	Magnesium chelatase, subunit ChlI
WP_000894500.1	yqiC	S	Membrane fusogenic activity
WP_000780326.1	glnK	K	Belongs to the P(II) protein family
WP_000738519.1	amtB	P	Ammonium Transporter Family
WP_000543541.1	nrdR	K	Negatively regulates transcription of bacterial ribonucleotide reductase nrd genes and operons by binding to NrdR- boxes
WP_045900576.1	ribD	H	Converts 2,5-diamino-6-(ribosylamino)-4(3h)-pyrimidinone 5'-phosphate into 5-amino-6-(ribosylamino)-2,4(1h,3h)- pyrimidinedione 5'-phosphate
WP_001083669.1	fokIM	L	D12 class N6 adenine-specific DNA methyltransferase
WP_000493864.1	ribE	H	Lumazine binding domain
WP_000354154.1
WP_152562418.1
WP_001151592.1	holC	L	DNA polymerase III, chi subunit
WP_000673449.1	pepA	E	Presumably involved in the processing and regular turnover of intracellular proteins. Catalyzes the removal of unsubstituted N-terminal amino acids from various peptides
WP_000586912.1	lptF	S	Predicted permease YjgP/YjgQ family
WP_000881094.1	lptG	S	Predicted permease YjgP/YjgQ family
WP_000128749.1	gpmI	G	Catalyzes the interconversion of 2-phosphoglycerate and 3-phosphoglycerate
WP_000939107.1		M	tail specific protease
WP_045900575.1	pilR	T	Sigma-54 interaction domain
WP_086222369.1	kinA	T	PAS domain
WP_000633799.1	uvrY	K	response regulator
WP_005140205.1	pbpG	M	Belongs to the peptidase S11 family
WP_000063593.1	thrC	E	Catalyzes the gamma-elimination of phosphate from L- phosphohomoserine and the beta-addition of water to produce L- threonine
WP_000805827.1	hom	E	homoserine dehydrogenase
WP_000011163.1	dsbC	O	Required for disulfide bond formation in some periplasmic proteins. Acts by transferring its disulfide bond to other proteins and is reduced in the process
WP_000608735.1	xerD	D	recombinase XerD
WP_001991212.1	feoA	P	FeoA
WP_001278225.1	feoB	P	Ferrous iron transport protein B
WP_024438493.1
WP_047479590.1	murD	M	Cell wall formation. Catalyzes the addition of glutamate to the nucleotide precursor UDP-N-acetylmuramoyl-L-alanine (UMA)
WP_000907680.1	ftsW	D	Peptidoglycan polymerase that is essential for cell division
WP_032038573.1	gluQ	J	Catalyzes the tRNA-independent activation of glutamate in presence of ATP and the subsequent transfer of glutamate onto a tRNA(Asp). Glutamate is transferred on the 2-amino-5-(4,5- dihydroxy-2-cyclopenten-1-yl) moiety of the queuosine in the wobble position of the QUC anticodon
WP_001262524.1	dksA	T	Transcription factor that acts by binding directly to the RNA polymerase (RNAP). Required for negative regulation of rRNA expression and positive regulation of several amino acid biosynthesis promoters. Also required for regulation of fis expression
WP_000143915.1	cpdA	S	Hydrolyzes cAMP to 5'-AMP. Plays an important regulatory role in modulating the intracellular concentration of cAMP, thereby influencing cAMP-dependent processes
WP_000029221.1	nudF	L	NUDIX domain
WP_001072861.1	thiC	H	Catalyzes the synthesis of the hydroxymethylpyrimidine phosphate (HMP-P) moiety of thiamine from aminoimidazole ribotide (AIR) in a radical S-adenosyl-L-methionine (SAM)-dependent reaction
WP_161782815.1
WP_000998524.1		K	Bacterial regulatory proteins, tetR family
WP_047479594.1	ywfM	EG	EamA-like transporter family
WP_000959183.1	tolC	MU	Outer membrane efflux protein
WP_000948570.1	phoU	P	Plays a role in the regulation of phosphate uptake
WP_000089996.1	yggX	CO	Could be a mediator in iron transactions between iron acquisition and iron-requiring processes, such as synthesis and or repair of Fe-S clusters in biosynthetic enzymes
WP_000213740.1	argH	E	argininosuccinate lyase
WP_000269799.1	algZ	T	Histidine kinase
WP_171126843.1	algR	KT	LytTr DNA-binding domain
WP_000889206.1	hemC	H	Tetrapolymerization of the monopyrrole PBG into the hydroxymethylbilane pre-uroporphyrinogen in several discrete steps
WP_031959800.1	hemD	H	Uroporphyrinogen-III synthase
WP_001230201.1
WP_085940603.1
WP_000338599.1	fcbC	S	Thioesterase-like superfamily
WP_000801427.1	hvrA	S	Domain in histone-like proteins of HNS family
WP_000730343.1	gspN	S	Type II secretion system (T2SS), protein N
WP_032047216.1	gspC	U	Type II secretion system protein C
WP_001196441.1	gspD	NU	Bacterial type II and III secretion system protein
WP_000219969.1		T	Forkhead associated domain
WP_000109463.1	gph	G	HAD-hyrolase-like
WP_047479607.1	trpE	E	Part of a heterotetrameric complex that catalyzes the two-step biosynthesis of anthranilate, an intermediate in the biosynthesis of L-tryptophan. In the first step, the glutamine- binding beta subunit (TrpG) of anthranilate synthase (AS) provides the glutamine amidotransferase activity which generates ammonia as a substrate that, along with chorismate, is used in the second step, catalyzed by the…
WP_001029610.1	tuf	J	This protein promotes the GTP-dependent binding of aminoacyl-tRNA to the A-site of ribosomes during protein biosynthesis
WP_000063880.1	secE	U	Essential subunit of the Sec protein translocation channel SecYEG. Clamps together the 2 halves of SecY. May contact the channel plug during translocation
WP_000832994.1	nusG	K	Participates in transcription elongation, termination and antitermination
WP_001074682.1	rplK	J	Forms part of the ribosomal stalk which helps the ribosome interact with GTP-bound translation factors
WP_001096694.1	rplA	J	Binds directly to 23S rRNA. The L1 stalk is quite mobile in the ribosome, and is involved in E site tRNA release
WP_001196213.1	rplJ	J	Forms part of the ribosomal stalk, playing a central role in the interaction of the ribosome with GTP-bound translation factors
WP_001229360.1	rplL	J	Forms part of the ribosomal stalk which helps the ribosome interact with GTP-bound translation factors. Is thus essential for accurate translation
WP_000331899.1	rpoB	K	DNA-dependent RNA polymerase catalyzes the transcription of DNA into RNA using the four ribonucleoside triphosphates as substrates
WP_000653927.1	rpoC	K	DNA-dependent RNA polymerase catalyzes the transcription of DNA into RNA using the four ribonucleoside triphosphates as substrates
WP_000738603.1
WP_001034851.1
WP_000996189.1		Q	Domain of unknown function (DUF4442)
WP_161782806.1		S	Alpha/beta hydrolase family
WP_000994938.1	yuiF	S	Na H antiporter
WP_000472952.1	ompW	M	OmpW family
WP_001080202.1		G	4-amino-4-deoxy-alpha-L-arabinopyranosyl undecaprenyl phosphate biosynthetic process
WP_045901157.1	htpG	O	Molecular chaperone. Has ATPase activity
WP_045901159.1
WP_000846676.1
WP_001261850.1	frnE	Q	DSBA-like thioredoxin domain
WP_001255246.1
WP_001046657.1		K	helix_turn_helix, mercury resistance
WP_079378426.1		S	Serine hydrolase
WP_045901166.1
WP_000212712.1	fadA	I	Catalyzes the final step of fatty acid oxidation in which acetyl-CoA is released and the CoA ester of a fatty acid two carbons shorter is formed
WP_000580938.1	fadB	I	Involved in the aerobic and anaerobic degradation of long-chain fatty acids via beta-oxidation cycle. Catalyzes the formation of 3-oxoacyl-CoA from enoyl-CoA via L-3-hydroxyacyl-CoA. It can also use D-3-hydroxyacyl-CoA and cis-3-enoyl-CoA as substrate
WP_032060528.1
WP_024438379.1	lpxO	O	Aspartyl/Asparaginyl beta-hydroxylase
WP_001092666.1
WP_047479630.1		M	COG3209 Rhs family protein
WP_012300759.1	uvrC	L	The UvrABC repair system catalyzes the recognition and processing of DNA lesions. UvrC both incises the 5' and 3' sides of the lesion. The N-terminal half is responsible for the 3' incision and the C-terminal half is responsible for the 5' incision
WP_000054628.1		I	Thioesterase-like superfamily
WP_000206941.1	pgsA	I	Belongs to the CDP-alcohol phosphatidyltransferase class-I family
WP_047479633.1	ada	K	6-O-methylguanine DNA methyltransferase, DNA binding domain
WP_000171258.1	alkB	L	2OG-Fe(II) oxygenase superfamily
WP_001018361.1		K	Bacterial transcriptional regulator
WP_000925016.1		S	Fusaric acid resistance protein family
WP_000503613.1		S	Protein of unknown function (DUF1656)
WP_001072475.1	ydhJ	V	Barrel-sandwich domain of CusB or HlyD membrane-fusion
WP_000127528.1	yrrK	L	Could be a nuclease involved in processing of the 5'-end of pre-16S rRNA
WP_001979301.1	yqgE	K	Belongs to the UPF0301 (AlgH) family
WP_000955429.1	recN	L	May be involved in recombinational repair of damaged DNA
WP_045901178.1		S	Tetratricopeptide repeat
WP_000099685.1	ppnP	S	Catalyzes the phosphorolysis of diverse nucleosides, yielding D-ribose 1-phosphate and the respective free bases. Can use uridine, adenosine, guanosine, cytidine, thymidine, inosine and xanthosine as substrates. Also catalyzes the reverse reactions
WP_045901180.1	rlmB	J	Specifically methylates the ribose of guanosine 2251 in 23S rRNA
WP_000075011.1		EG	EamA-like transporter family
WP_000874125.1	coaE	H	Catalyzes the phosphorylation of the 3'-hydroxyl group of dephosphocoenzyme A to form coenzyme A
WP_047479636.1	pilD	NOU	Cleaves type-4 fimbrial leader sequence and methylates the N-terminal (generally Phe) residue
WP_047479638.1	pilC	U	Type II secretion system (T2SS), protein F
WP_047479641.1	pilB	NU	Type II secretory pathway, ATPase PulE Tfp pilus assembly pathway, ATPase PilB
WP_014466027.1	tpiA	G	Involved in the gluconeogenesis. Catalyzes stereospecifically the conversion of dihydroxyacetone phosphate (DHAP) to D-glyceraldehyde-3-phosphate (G3P)
WP_000555570.1	secG	U	Preprotein translocase SecG subunit
WP_000777730.1	rimP	S	Required for maturation of 30S ribosomal subunits
WP_045901183.1	nusA	K	Participates in both transcription termination and antitermination
WP_000130326.1	infB	J	One of the essential components for the initiation of protein synthesis. Protects formylmethionyl-tRNA from spontaneous hydrolysis and promotes its binding to the 30S ribosomal subunits. Also involved in the hydrolysis of GTP during the formation of the 70S ribosomal complex
WP_000897046.1	rbfA	J	One of several proteins that assist in the late maturation steps of the functional core of the 30S ribosomal subunit. Associates with free 30S ribosomal subunits (but not with 30S subunits that are part of 70S ribosomes or polysomes). Required for efficient processing of 16S rRNA. May interact with the 5'-terminal helix region of 16S rRNA
WP_001167533.1	mrpG	P	Na+/H+ antiporter subunit
WP_000154076.1	mrpF	P	Multiple resistance and pH regulation protein F (MrpF / PhaF)
WP_045901187.1	phaE	P	Na+/H+ ion antiporter subunit
WP_000459271.1	phaD	CP	Proton-conducting membrane transporter
WP_000624229.1	mrpC	P	NADH-ubiquinone/plastoquinone oxidoreductase chain 4L
343	mrpA	CP	Domain related to MnhB subunit of Na+/H+ antiporter
WP_047479645.1		S	AAA domain
WP_000065138.1		L	DNA helicase
WP_001066569.1	hisE	E	belongs to the PRA-CH family
WP_045901194.1		CH	FAD binding domain
WP_000612218.1	ubiB	S	ABC1 family
WP_000269705.1	yigP	S	ubiquinone biosynthetic process from chorismate
WP_000064213.1	ubiE	H	Methyltransferase required for the conversion of demethylmenaquinol (DMKH2) to menaquinol (MKH2) and the conversion of 2-polyprenyl-6-methoxy-1,4-benzoquinol (DDMQH2) to 2- polyprenyl-3-methyl-6-methoxy-1,4-benzoquinol (DMQH2)
WP_000039802.1
WP_000003538.1	pap	S	Polyphosphate kinase 2 (PPK2)
WP_000687236.1		S	protein domain associated with
WP_045901198.1	recC	L	A helicase nuclease that prepares dsDNA breaks (DSB) for recombinational DNA repair. Binds to DSBs and unwinds DNA via a highly rapid and processive ATP-dependent bidirectional helicase activity. Unwinds dsDNA until it encounters a Chi (crossover hotspot instigator) sequence from the 3' direction. Cuts ssDNA a few nucleotides 3' to the Chi site. The properties and activities of the enzyme are cha…
WP_152562444.1	recB	L	A helicase nuclease that prepares dsDNA breaks (DSB) for recombinational DNA repair. Binds to DSBs and unwinds DNA via a highly rapid and processive ATP-dependent bidirectional helicase activity. Unwinds dsDNA until it encounters a Chi (crossover hotspot instigator) sequence from the 3' direction. Cuts ssDNA a few nucleotides 3' to the Chi site. The properties and activities of the enzyme are cha…
WP_045901204.1	recD	L	A helicase nuclease that prepares dsDNA breaks (DSB) for recombinational DNA repair. Binds to DSBs and unwinds DNA via a highly rapid and processive ATP-dependent bidirectional helicase activity. Unwinds dsDNA until it encounters a Chi (crossover hotspot instigator) sequence from the 3' direction. Cuts ssDNA a few nucleotides 3' to the Chi site. The properties and activities of the enzyme are cha…
WP_000689287.1		V	Beta-lactamase
WP_001229357.1	rpsO	J	Forms an intersubunit bridge (bridge B4) with the 23S rRNA of the 50S subunit in the ribosome
WP_001985790.1	pnp	J	Involved in mRNA degradation. Catalyzes the phosphorolysis of single-stranded polyribonucleotides processively in the 3'- to 5'-direction
WP_001198549.1	corA	P	CorA-like Mg2+ transporter protein
WP_000207459.1	cbpM	K	MerR HTH family regulatory protein
WP_002132747.1	cbpA	O	DnaJ molecular chaperone homology domain
WP_023897374.1	rhtB	E	LysE type translocator
WP_001281765.1	hslO	O	Redox regulated molecular chaperone. Protects both thermally unfolding and oxidatively damaged proteins from irreversible aggregation. Plays an important role in the bacterial defense system toward oxidative stress
WP_047479661.1	kefC	P	Belongs to the monovalent cation proton antiporter 2 (CPA2) transporter (TC 2.A.37) family
WP_005133261.1	priA	L	Involved in the restart of stalled replication forks. Recognizes and binds the arrested nascent DNA chain at stalled replication forks. It can open the DNA duplex, via its helicase activity, and promote assembly of the primosome and loading of the major replicative helicase DnaB onto DNA
WP_001112089.1	gspF	U	general secretion pathway protein
WP_000865313.1	gspG	U	general secretion pathway protein
WP_000643176.1
WP_000434938.1	csaA	J	Putative tRNA binding domain
WP_001203093.1	lnt	M	Transfers the fatty acyl group on membrane lipoproteins
WP_002000659.1	corC	P	Transporter associated domain
WP_000003406.1	tusA	O	Belongs to the sulfur carrier protein TusA family
WP_015451378.1
WP_000400007.1	etf	C	Electron transfer flavoprotein-ubiquinone oxidoreductase
WP_000248027.1	MA20_44640	S	Protein of unknown function (DUF1285)
WP_000125345.1	murI	M	Provides the (R)-glutamate required for cell wall biosynthesis
WP_000887664.1		S	Domain of unknown function (DUF4062)
WP_045901212.1	hemH	H	Catalyzes the ferrous insertion into protoporphyrin IX
WP_000942274.1	ycbL	S	Metallo-beta-lactamase superfamily
WP_001138289.1	yacG	S	Inhibits all the catalytic activities of DNA gyrase by preventing its interaction with DNA. Acts by binding directly to the C-terminal domain of GyrB, which probably disrupts DNA binding by the gyrase
WP_161782807.1	yggH	H	Putative methyltransferase
WP_047479670.1		S	HI0933-like protein
WP_047479672.1		S	Glutathione-dependent formaldehyde-activating enzyme
WP_000291734.1	crcB	D	Important for reducing fluoride concentration in the cell, thus reducing its toxicity
WP_033852787.1	hopJ	S	HopJ type III effector protein
WP_001224256.1	rpmE2	J	Ribosomal protein L31
WP_045901219.1		S	ABC1 family
WP_045901220.1		I	Acyl-CoA dehydrogenase, C-terminal domain
WP_045901222.1	seuB	I	Acyl-CoA dehydrogenase, C-terminal domain
WP_000936786.1	norM	V	MatE
WP_000511148.1		S	Putative inner membrane exporter, YdcZ
WP_047479677.1	yggW	H	Involved in the biosynthesis of porphyrin-containing compound
WP_000207252.1		IQ	KR domain
WP_047479680.1		K	LysR substrate binding domain
WP_000084316.1		IQ	AMP-binding enzyme C-terminal domain
WP_047479683.1	rne	J	Endoribonuclease that plays a central role in RNA processing and decay. Required for the maturation of 5S and 16S rRNAs and the majority of tRNAs. Also involved in the degradation of most mRNAs
WP_001089412.1	rluC	J	Responsible for synthesis of pseudouridine from uracil
WP_000054128.1	gph	S	HAD-hyrolase-like
WP_000091419.1		K	WYL domain
WP_047479685.1	gst	O	Glutathione S-transferase, N-terminal domain
WP_000232918.1	MA20_23190	S	Protein of unknown function (DUF1345)
WP_000423241.1	hcaR	K	LysR substrate binding domain
WP_000653392.1	romA	S	Beta-lactamase superfamily domain
WP_000064289.1	katG	P	Bifunctional enzyme with both catalase and broad- spectrum peroxidase activity
WP_000069129.1	ptsP	T	Belongs to the PEP-utilizing enzyme family
WP_000567254.1	nudH	L	Accelerates the degradation of transcripts by removing pyrophosphate from the 5'-end of triphosphorylated RNA, leading to a more labile monophosphorylated state that can stimulate subsequent ribonuclease cleavage
WP_023897359.1	YPO1315	E	haloacid dehalogenase-like hydrolase
409
WP_000164722.1
WP_001046500.1	cmpR_1	K	Transcriptional regulator
WP_000244900.1		S	Predicted membrane protein (DUF2061)
WP_100223281.1	leuC	E	Catalyzes the isomerization between 2-isopropylmalate and 3-isopropylmalate, via the formation of 2-isopropylmaleate
WP_000649450.1	leuD	E	Catalyzes the isomerization between 2-isopropylmalate and 3-isopropylmalate, via the formation of 2-isopropylmaleate
WP_001984507.1
WP_047479689.1	leuB	CE	Catalyzes the oxidation of 3-carboxy-2-hydroxy-4- methylpentanoate (3-isopropylmalate) to 3-carboxy-4-methyl-2- oxopentanoate. The product decarboxylates to 4-methyl-2 oxopentanoate
WP_002030185.1
WP_000724606.1		S	Lysozyme inhibitor LprI
WP_001284370.1	infA	J	One of the essential components for the initiation of protein synthesis. Stabilizes the binding of IF-2 and IF-3 on the 30S subunit to which N-formylmethionyl-tRNA(fMet) subsequently binds. Helps modulate mRNA selection, yielding the 30S pre- initiation complex (PIC). Upon addition of the 50S ribosomal subunit IF-1, IF-2 and IF-3 are released leaving the mature 70S translation initation complex
WP_002009591.1		K	Arabinose-binding domain of AraC transcription regulator, N-term
WP_001190102.1	truA	J	Formation of pseudouridine at positions 38, 39 and 40 in the anticodon stem and loop of transfer RNAs
WP_045901248.1	ansA	EJ	Asparaginase
WP_161782816.1
WP_047479695.1	fimV	NU	Tfp pilus assembly protein FimV
WP_000862762.1	asd	E	Catalyzes the NADPH-dependent formation of L-aspartate- semialdehyde (L-ASA) by the reductive dephosphorylation of L- aspartyl-4-phosphate
WP_000639217.1	VPA0486	S	Endonuclease/Exonuclease/phosphatase family
WP_000787680.1	gltT	U	Catalyzes the proton-dependent transport of glutamate and aspartate
WP_047479698.1	capM	M	Glycosyl transferase 4-like domain
WP_000078874.1	lpxL	M	Catalyzes the transfer of laurate from lauroyl-acyl carrier protein (ACP) to Kdo(2)-lipid IV(A) to form Kdo(2)- (lauroyl)-lipid IV(A)
WP_045901259.1	MA20_22020	E	LysE type translocator
WP_045901262.1	uup	S	COG0488 ATPase components of ABC transporters with duplicated ATPase domains
WP_000165735.1	slyX	S	SlyX
WP_047479700.1		C	Belongs to the zinc-containing alcohol dehydrogenase family. Quinone oxidoreductase subfamily
WP_047479703.1	yybR	K	HxlR-like helix-turn-helix
WP_047479707.1
WP_000024261.1	topA	L	Releases the supercoiling and torsional tension of DNA, which is introduced during the DNA replication and transcription, by transiently cleaving and rejoining one strand of the DNA duplex. Introduces a single-strand break via transesterification at a target site in duplex DNA. The scissile phosphodiester is attacked by the catalytic tyrosine of the enzyme, resulting in the formation of a DNA-(5'…
WP_047479710.1
WP_000859452.1		S	Short repeat of unknown function (DUF308)
WP_047479713.1	uvrD	L	UvrD-like helicase C-terminal domain
WP_000699342.1		S	RNA recognition motif
WP_001183878.1		S	ASCH domain
WP_000985993.1
WP_000027403.1
WP_001119808.1	ybaL	P	Belongs to the monovalent cation proton antiporter 2 (CPA2) transporter (TC 2.A.37) family
WP_001205031.1	rpmG	J	Belongs to the bacterial ribosomal protein bL33 family
WP_000048256.1	rpmB	J	Belongs to the bacterial ribosomal protein bL28 family
WP_001088254.1	calB	C	belongs to the aldehyde dehydrogenase family
WP_000056618.1	phaD	K	Bacterial transcriptional repressor
WP_000080849.1	purU	F	Catalyzes the hydrolysis of 10-formyltetrahydrofolate (formyl-FH4) to formate and tetrahydrofolate (FH4)
WP_000730960.1		M	Gram-negative bacterial TonB protein C-terminal
WP_001011664.1	exbB	U	MotA TolQ ExbB proton channel
WP_000885431.1	exbD2	U	Biopolymer transport protein
WP_001183413.1	msrA	O	Has an important function as a repair enzyme for proteins that have been inactivated by oxidation. Catalyzes the reversible oxidation-reduction of methionine sulfoxide in proteins to methionine
WP_031959647.1		S	Domain of unknown function (DUF4105)
WP_000312548.1	folA	H	Key enzyme in folate metabolism. Catalyzes an essential reaction for de novo glycine and purine synthesis, and for DNA precursor synthesis
WP_001203170.1	thyA	F	Catalyzes the reductive methylation of 2'-deoxyuridine- 5'-monophosphate (dUMP) to 2'-deoxythymidine-5'-monophosphate (dTMP) while utilizing 5,10-methylenetetrahydrofolate (mTHF) as the methyl donor and reductant in the reaction, yielding dihydrofolate (DHF) as a by-product. This enzymatic reaction provides an intracellular de novo source of dTMP, an essential precursor for DNA biosynthesis
WP_047479720.1
WP_000889270.1
WP_000959085.1	lgt	M	Transfers the N-acyl diglyceride group on what will become the N-terminal cysteine of membrane lipoproteins
WP_152562445.1		S	Transport and Golgi organisation 2
WP_047479726.1	phoX	S	Bacterial protein of unknown function (DUF839)
WP_032039820.1	phoX	S	Bacterial protein of unknown function (DUF839)
WP_004748352.1	tatB	U	Part of the twin-arginine translocation (Tat) system that transports large folded proteins containing a characteristic twin-arginine motif in their signal peptide across membranes. Together with TatC, TatB is part of a receptor directly interacting with Tat signal peptides. TatB may form an oligomeric binding site that transiently accommodates folded Tat precursor proteins before their translocat…
WP_000908081.1	tatA	U	Part of the twin-arginine translocation (Tat) system that transports large folded proteins containing a characteristic twin-arginine motif in their signal peptide across membranes. TatA could form the protein-conducting channel of the Tat system
WP_047479731.1		S	Auxin Efflux Carrier
WP_000106715.1	rdgB	F	Pyrophosphatase that catalyzes the hydrolysis of nucleoside triphosphates to their monophosphate derivatives, with a high preference for the non-canonical purine nucleotides XTP (xanthosine triphosphate), dITP (deoxyinosine triphosphate) and ITP. Seems to function as a house-cleaning enzyme that removes non-canonical purine nucleotides from the nucleotide pool, thus preventing their incorporation…
WP_002009379.1		S	Sel1-like repeats.
WP_001217230.1	metW	Q	Methionine biosynthesis protein MetW
WP_000009640.1	metX	E	Transfers a succinyl group from succinyl-CoA to L- homoserine, forming succinyl-L-homoserine
WP_000978841.1	leuA	E	Catalyzes the condensation of the acetyl group of acetyl-CoA with 3-methyl-2-oxobutanoate (2-oxoisovalerate) to form 3-carboxy-3-hydroxy-4-methylpentanoate (2-isopropylmalate)
WP_001984475.1	piuC	S	monosaccharide binding
WP_047479734.1		P	TonB dependent receptor
WP_001198432.1	tig	D	Involved in protein export. Acts as a chaperone by maintaining the newly synthesized protein in an open conformation. Functions as a peptidyl-prolyl cis-trans isomerase
WP_000289452.1	clpP	OU	Cleaves peptides in various proteins in a process that requires ATP hydrolysis. Has a chymotrypsin-like activity. Plays a major role in the degradation of misfolded proteins
WP_001289249.1	clpX	O	ATP-dependent specificity component of the Clp protease. It directs the protease to specific substrates. Can perform chaperone functions in the absence of ClpP
WP_047479736.1		S	Protein of unknown function (DUF2846)
WP_000155519.1		S	Uncharacterized protein conserved in bacteria (DUF2059)
WP_000207467.1	fumA	C	Catalyzes the reversible hydration of fumarate to (S)- malate
WP_001092293.1	pta	C	belongs to the CobB CobQ family
WP_000236000.1	ackA	H	Catalyzes the formation of acetyl phosphate from acetate and ATP. Can also catalyze the reverse reaction
WP_047479739.1	edd	EG	Belongs to the IlvD Edd family
WP_000034283.1	eda	G	KDPG and KHG aldolase
WP_000450961.1	gntT	EG	GntP family permease
WP_001978744.1	gntK	F	AAA domain
WP_001072702.1	gapN	C	Aldehyde dehydrogenase family
WP_001154158.1	proA	E	Catalyzes the NADPH-dependent reduction of L-glutamate 5-phosphate into L-glutamate 5-semialdehyde and phosphate. The product spontaneously undergoes cyclization to form 1-pyrroline-5- carboxylate
WP_086222384.1		S	alpha/beta hydrolase fold
WP_000191936.1		Q	Leucine carboxyl methyltransferase
WP_045901288.1	nagZ	G	Plays a role in peptidoglycan recycling by cleaving the terminal beta-1,4-linked N-acetylglucosamine (GlcNAc) from peptide-linked peptidoglycan fragments, giving rise to free GlcNAc, anhydro-N-acetylmuramic acid and anhydro-N-acetylmuramic acid-linked peptides
WP_000776302.1	prc	M	Belongs to the peptidase S41A family
WP_001991191.1		M	Glycosyltransferase Family 4
WP_000669565.1		I	Acid phosphatase homologues
WP_000524329.1	iscX	S	Fe-S assembly protein IscX
WP_000963851.1	ndk	F	Major role in the synthesis of nucleoside triphosphates other than ATP. The ATP gamma phosphate is transferred to the NDP beta phosphate via a ping-pong mechanism, using a phosphorylated active-site intermediate
WP_000093084.1	rlmN	J	Specifically methylates position 2 of adenine 2503 in 23S rRNA and position 2 of adenine 37 in tRNAs
WP_000537695.1	pilF	NU	Tetratricopeptide repeat
WP_000405163.1	rodZ	S	Domain of unknown function (DUF4115)
WP_000572095.1	ispG	I	Converts 2C-methyl-D-erythritol 2,4-cyclodiphosphate (ME-2,4cPP) into 1-hydroxy-2-methyl-2-(E)-butenyl 4-diphosphate
WP_000095253.1	hisS	J	histidyl-tRNA synthetase
WP_045901290.1	yfgM	S	Tetratricopeptide repeat-like domain
WP_001072119.1	bamB	M	Part of the outer membrane protein assembly complex, which is involved in assembly and insertion of beta-barrel proteins into the outer membrane
WP_000805592.1	der	S	GTPase that plays an essential role in the late steps of ribosome biogenesis
WP_047479743.1		IQ	Beta-ketoacyl synthase, N-terminal domain
WP_002000541.1		I	Phosphate acyltransferases
WP_000067033.1	acp	IQ	Phosphopantetheine attachment site
WP_001987856.1	acpP2	IQ	Carrier of the growing fatty acid chain in fatty acid biosynthesis
WP_000668777.1		S	Intracellular septation protein A
WP_047479746.1	srfAB	IQ	AMP-binding enzyme
WP_047479749.1		S	Glycosyl transferase family 2
WP_047479752.1	ycdQ	S	Bacterial lipid A biosynthesis acyltransferase
WP_047479755.1	hutH	E	histidine ammonia-lyase activity
WP_000542808.1	fcbC	S	Thioesterase-like superfamily
WP_047479758.1	lola3	M	Participates in the translocation of lipoproteins from the inner membrane to the outer membrane. Only forms a complex with a lipoprotein if the residue after the N-terminal Cys is not an aspartate (The Asp acts as a targeting signal to indicate that the lipoprotein should stay in the inner membrane)
WP_152562446.1	VP0886	S	exporter
WP_000103763.1	fixC	C	Tryptophan halogenase
WP_047479766.1		S	Protein of unknown function (DUF3261)
WP_047479769.1	fabF2	IQ	Beta-ketoacyl synthase, C-terminal domain
WP_000762337.1	fabZ2	I	3-hydroxylacyl-(Acyl carrier protein) dehydratase
WP_079378427.1		IQ	KR domain
WP_024438122.1	fabF2	I	Catalyzes the condensation reaction of fatty acid synthesis by the addition to an acyl acceptor of two carbons from malonyl-ACP
WP_000932715.1		S	excinuclease, ATPase subunit
WP_047479774.1	acpT	H	Belongs to the P-Pant transferase superfamily
WP_001288260.1	secB	U	One of the proteins required for the normal export of preproteins out of the cell cytoplasm. It is a molecular chaperone that binds to a subset of precursor proteins, maintaining them in a translocation-competent state. It also specifically binds to its receptor SecA
WP_000729828.1	grxC	O	Has a glutathione-disulfide oxidoreductase activity in the presence of NADPH and glutathione reductase. Reduces low molecular weight disulfides and proteins
WP_000443006.1	yibN	P	Rhodanese Homology Domain
WP_001173998.1	rsgA	S	One of several proteins that assist in the late maturation steps of the functional core of the 30S ribosomal subunit. Helps release RbfA from mature subunits. May play a role in the assembly of ribosomal proteins into the subunit. Circularly permuted GTPase that catalyzes slow GTP hydrolysis, GTPase activity is stimulated by the 30S ribosomal subunit
WP_000099436.1	orn	A	3'-to-5' exoribonuclease specific for small oligoribonucleotides
WP_001191562.1		S	Bax inhibitor 1 like
WP_085916989.1	fabI	I	Enoyl- acyl-carrier-protein reductase NADH
WP_161325523.1	oprM	M	Outer membrane efflux protein
WP_045901293.1	macB	V	Part of the tripartite efflux system MacAB-TolC. MacB is a non-canonical ABC transporter that contains transmembrane domains (TMD), which form a pore in the inner membrane, and an ATP-binding domain (NBD), which is responsible for energy generation. Confers resistance against macrolides
WP_001124220.1		M	Belongs to the membrane fusion protein (MFP) (TC 8.A.1) family
WP_000762831.1	holA	L	DNA polymerase III, delta subunit
WP_000549819.1	lptE	M	Together with LptD, is involved in the assembly of lipopolysaccharide (LPS) at the surface of the outer membrane. Required for the proper assembly of LptD. Binds LPS and may serve as the LPS recognition site at the outer membrane
WP_045901295.1	leuS	J	Belongs to the class-I aminoacyl-tRNA synthetase family
WP_045901297.1		S	Domain of unknown function (DUF4124)
WP_000422094.1	ilvI	H	acetolactate synthase
WP_001215920.1	ilvH	E	Acetolactate synthase small
WP_001165443.1	ilvC	H	Involved in the biosynthesis of branched-chain amino acids (BCAA). Catalyzes an alkyl-migration followed by a ketol- acid reduction of (S)-2-acetolactate (S2AL) to yield (R)-2,3- dihydroxy-isovalerate. In the isomerase reaction, S2AL is rearranged via a Mg-dependent methyl migration to produce 3- hydroxy-3-methyl-2-ketobutyrate (HMKB). In the reductase reaction, this 2-ketoacid undergoes a metal-…
WP_000510211.1	ydcR	T	Putative diguanylate phosphodiesterase
WP_047479783.1		K	Transcriptional regulator
WP_000043984.1		K	Bacterial regulatory proteins, tetR family
WP_047479786.1		S	Iron-containing redox enzyme
WP_000008539.1	prfC	J	Increases the formation of ribosomal termination complexes and stimulates activities of RF-1 and RF-2. It binds guanine nucleotides and has strong preference for UGA stop codons. It may interact directly with the ribosome. The stimulation of RF- 1 and RF-2 is significantly reduced by GTP and GDP, but not by GMP
WP_001054078.1
WP_047479789.1		S	Protein of unknown function (DUF3298)
WP_047479792.1	yjjV	L	TatD related DNase
WP_002045379.1	acnA	C	Catalyzes the isomerization of citrate to isocitrate via cis-aconitate
WP_000130927.1	ygdL	H	COG1179 Dinucleotide-utilizing enzymes involved in molybdopterin and thiamine biosynthesis family 1
WP_161782808.1		K	LysR substrate binding domain
WP_000587862.1		M	COG3209 Rhs family protein
WP_045901309.1	dusA	J	Catalyzes the synthesis of 5,6-dihydrouridine (D), a modified base found in the D-loop of most tRNAs, via the reduction of the C5-C6 double bond in target uridines. Specifically modifies U20 and U20a in tRNAs
WP_047479799.1	ygaY	EGP	Major facilitator Superfamily
WP_045901311.1	yjgH	J	Endoribonuclease L-PSP
WP_000703584.1	eamA1	EG	EamA-like transporter family
WP_001165468.1	pntAA	C	Alanine dehydrogenase/PNT, N-terminal domain
WP_000230434.1	pntAB	C	4TM region of pyridine nucleotide transhydrogenase, mitoch
WP_000394402.1	pntB	C	The transhydrogenation between NADH and NADP is coupled to respiration and ATP hydrolysis and functions as a proton pump across the membrane
WP_047479806.1		IQ	NAD dependent epimerase/dehydratase family
WP_001098046.1	rsfS	J	Functions as a ribosomal silencing factor. Interacts with ribosomal protein L14 (rplN), blocking formation of intersubunit bridge B8. Prevents association of the 30S and 50S ribosomal subunits and the formation of functional ribosomes, thus repressing translation
WP_000532984.1	hyi	G	Belongs to the hyi family
WP_001008372.1	glxR	I	NAD-binding of NADP-dependent 3-hydroxyisobutyrate dehydrogenase
WP_001196726.1	phaB	I	Belongs to the enoyl-CoA hydratase isomerase family
WP_000064534.1	barA	T	PhoQ Sensor
WP_171126832.1	cysM	E	Belongs to the cysteine synthase cystathionine beta- synthase family
WP_001212165.1	wlaX	L	3'-5' exonuclease related to the exonuclease domain of PolB
WP_047479813.1	rlmD	J	Catalyzes the formation of 5-methyl-uridine at position 1939 (m5U1939) in 23S rRNA
WP_000259109.1	relA	KT	In eubacteria ppGpp (guanosine 3'-diphosphate 5-' diphosphate) is a mediator of the stringent response that coordinates a variety of cellular activities in response to changes in nutritional abundance
WP_045901326.1		IQ	Belongs to the short-chain dehydrogenases reductases (SDR) family
WP_045901327.1	mazG	S	Nucleoside triphosphate pyrophosphohydrolase
WP_002041921.1	comEA	L	Helix-hairpin-helix motif
WP_171126845.1	pcnB	J	Adds poly(A) tail to the 3' end of many RNAs, which usually targets these RNAs for decay. Plays a significant role in the global control of gene expression, through influencing the rate of transcript degradation, and in the general RNA quality control
WP_000219213.1	folK	H	7,8-dihydro-6-hydroxymethylpterin-pyrophosphokinase (HPPK)
WP_000624763.1	panB	H	Catalyzes the reversible reaction in which hydroxymethyl group from 5,10-methylenetetrahydrofolate is transferred onto alpha-ketoisovalerate to form ketopantoate
WP_000846362.1	panC	H	Catalyzes the condensation of pantoate with beta-alanine in an ATP-dependent reaction via a pantoyl-adenylate intermediate
WP_000821671.1	rapZ	S	Displays ATPase and GTPase activities
WP_001984428.1	ptsH	G	PTS HPr component phosphorylation site
WP_000124014.1	yjgA	S	Belongs to the UPF0307 family
WP_000253052.1	MA20_29420	IQ	AMP-binding enzyme C-terminal domain
WP_045901332.1	thrS	J	Catalyzes the attachment of threonine to tRNA(Thr) in a two-step reaction L-threonine is first activated by ATP to form Thr-AMP and then transferred to the acceptor end of tRNA(Thr)
WP_012297364.1	infC	J	IF-3 binds to the 30S ribosomal subunit and shifts the equilibrum between 70S ribosomes and their 50S and 30S subunits in favor of the free subunits, thus enhancing the availability of 30S subunits on which protein synthesis initiation begins
WP_047479818.1	yfcG	O	Belongs to the GST superfamily
585	yqaA	S	SNARE associated Golgi protein
WP_001169053.1	entS	EGP	Major facilitator Superfamily
WP_001096359.1	rpmI	J	Belongs to the bacterial ribosomal protein bL35 family
WP_000124858.1	rplT	J	Binds directly to 23S ribosomal RNA and is necessary for the in vitro assembly process of the 50S ribosomal subunit. It is not involved in the protein synthesizing functions of that subunit
WP_000564616.1	ybiA	O	peptidyl-tyrosine sulfation
WP_002059577.1		K	Acetyltransferase (GNAT) domain
WP_045901334.1
WP_000050953.1	pheS	J	Belongs to the class-II aminoacyl-tRNA synthetase family. Phe-tRNA synthetase alpha subunit type 1 subfamily
WP_045544544.1	pheT	J	Belongs to the phenylalanyl-tRNA synthetase beta subunit family. Type 1 subfamily
WP_000126166.1	himA	K	This protein is one of the two subunits of integration host factor, a specific DNA-binding protein that functions in genetic recombination as well as in transcriptional and translational control
WP_001054522.1	rho	K	Facilitates transcription termination by a mechanism that involves Rho binding to the nascent RNA, activation of Rho's RNA-dependent ATPase activity, and release of the mRNA from the DNA template
WP_001276875.1	trxA	O	Belongs to the thioredoxin family
WP_001279273.1	ppx	FP	Belongs to the GppA Ppx family
WP_000710403.1	accA	I	Component of the acetyl coenzyme A carboxylase (ACC) complex. First, biotin carboxylase catalyzes the carboxylation of biotin on its carrier protein (BCCP) and then the CO(2) group is transferred by the carboxyltransferase to acetyl-CoA to form malonyl-CoA
WP_079378428.1	tilS	D	Ligates lysine onto the cytidine present at position 34 of the AUA codon-specific tRNA(Ile) that contains the anticodon CAU, in an ATP-dependent manner. Cytidine is converted to lysidine, thus changing the amino acid specificity of the tRNA from methionine to isoleucine
WP_085916948.1	proC	E	Catalyzes the reduction of 1-pyrroline-5-carboxylate (PCA) to L-proline
WP_000501183.1	yggT	S	YGGT family
WP_001134663.1	polA	L	In addition to polymerase activity, this DNA polymerase exhibits 5'-3' exonuclease activity
WP_045901340.1		S	Predicted membrane protein (DUF2339)
WP_000785635.1		M	Mechanosensitive ion channel
WP_000462729.1
WP_001166321.1	xcpR	NU	Type II secretory pathway, ATPase PulE Tfp pilus assembly pathway, ATPase PilB
WP_000051212.1	ohr	O	OsmC-like protein
WP_000371731.1	ohrR	K	helix_turn_helix multiple antibiotic resistance protein
WP_000266120.1		S	Domian of unknown function (DUF4951)
WP_000177091.1	ramA	S	Carbon-nitrogen hydrolase
WP_000103065.1	IV02_16530	T	COG1366 Anti-anti-sigma regulatory factor (antagonist of anti-sigma factor)
WP_000273589.1	rsbP	KT	Sigma factor PP2C-like phosphatases
WP_079377644.1	vacJ	M	MlaA lipoprotein
WP_171126833.1	rpoN	K	Sigma factors are initiation factors that promote the attachment of RNA polymerase to specific initiation sites and are then released
WP_001167461.1	raiA	J	Sigma 54 modulation protein / S30EA ribosomal protein
WP_001083680.1	yrbA	K	Belongs to the BolA IbaG family
WP_000357156.1	murA	M	Belongs to the EPSP synthase family. MurA subfamily
WP_001000724.1	hisG	E	Catalyzes the condensation of ATP and 5-phosphoribose 1- diphosphate to form N'-(5'-phosphoribosyl)-ATP (PR-ATP). Has a crucial role in the pathway because the rate of histidine biosynthesis seems to be controlled primarily by regulation of HisG enzymatic activity
WP_001253725.1	hisD	E	Catalyzes the sequential NAD-dependent oxidations of L- histidinol to L-histidinaldehyde and then to L-histidine
WP_047479830.1	hisC	E	Belongs to the class-II pyridoxal-phosphate-dependent aminotransferase family. Histidinol-phosphate aminotransferase subfamily
WP_047481619.1	pabB	EH	chorismate binding enzyme
WP_161289809.1
WP_000889486.1		S	Peptidase C39 family
WP_000114385.1	batE	T	Sh3 type 3 domain protein
WP_005124689.1		I	Outer membrane protein transport protein (OMPP1/FadL/TodX)
WP_052109204.1
WP_047479832.1
WP_002067745.1	nudC_1	F	Nudix N-terminal
WP_086222279.1	nudL	L	COG0494 NTP pyrophosphohydrolases including oxidative damage repair enzymes
WP_086222282.1	yrdA	S	Hexapeptide repeat of succinyl-transferase
WP_000770248.1	yeaZ	O	Glycoprotease family
WP_031380677.1	rsmJ	J	Specifically methylates the guanosine in position 1516 of 16S rRNA
WP_032033779.1		S	Peptidase C13 family
WP_047479842.1	fghA	S	Serine hydrolase involved in the detoxification of formaldehyde
WP_000843452.1		S	Uncharacterized protein conserved in bacteria (DUF2218)
WP_000043044.1	rpe	G	Belongs to the ribulose-phosphate 3-epimerase family
WP_047479846.1	supH	S	Sucrose-6F-phosphate phosphohydrolase
WP_047479848.1
WP_047479851.1		Q	Multicopper oxidase
WP_086222281.1	copB	P	Copper resistance protein B precursor (CopB)
WP_086222280.1		P	Cation efflux family
WP_000312237.1	sugE	U	Small Multidrug Resistance protein
WP_000927479.1	ogt	L	Involved in the cellular defense against the biological effects of O6-methylguanine (O6-MeG) and O4-methylthymine (O4-MeT) in DNA. Repairs the methylated nucleobase in DNA by stoichiometrically transferring the methyl group to a cysteine residue in the enzyme. This is a suicide reaction the enzyme is irreversibly inactivated
WP_000268128.1	argJ	E	Catalyzes two activities which are involved in the cyclic version of arginine biosynthesis the synthesis of N- acetylglutamate from glutamate and acetyl-CoA as the acetyl donor, and of ornithine by transacetylation between N(2)-acetylornithine and glutamate
WP_001278262.1	nadA	H	Catalyzes the condensation of iminoaspartate with dihydroxyacetone phosphate to form quinolinate
WP_045900414.1	add	F	Adenosine/AMP deaminase
WP_045900413.1	MA20_17025	E	Alcohol dehydrogenase GroES-like domain
WP_045900412.1	gcdR	K	LysR substrate binding domain
WP_001016271.1	gcdH	I	Acyl-CoA dehydrogenase, middle domain
WP_047479855.1		G	MFS/sugar transport protein
WP_045900409.1		C	CoA-transferase family III
WP_047479858.1	tcuB	C	TIGRFAM CitB domain protein
WP_045900407.1	cobZ	C	FAD dependent oxidoreductase
WP_047479859.1		K	LysR substrate binding domain
WP_170318967.1		P	Bacterial extracellular solute-binding protein
WP_000383636.1	citA	EGP	Sugar (and other) transporter
WP_047479862.1		K	LysR substrate binding domain
WP_079378431.1		S	PAAR motif
664		K	LysR substrate binding domain
WP_000031359.1		S	Domain of unknown function (DUF1852)
WP_000735351.1	metE	E	Cobalamin-independent synthase, Catalytic domain
WP_000249482.1	hpaC	S	Flavin reductase like domain
WP_152562419.1		K	Transcriptional regulator
WP_047479878.1	xkdA	E	Pfam:DUF955
WP_047479881.1		S	Darcynin, domain of unknown function
WP_047479884.1		K	Bacterial regulatory proteins, tetR family
WP_047479886.1
WP_047479889.1		K	LysR substrate binding domain
WP_047479892.1	yddE	S	Phenazine biosynthesis-like protein
WP_047479894.1		S	Parallel beta-helix repeats
WP_000025827.1	nrdB	F	Provides the precursors necessary for DNA synthesis. Catalyzes the biosynthesis of deoxyribonucleotides from the corresponding ribonucleotides
WP_000465010.1
WP_033852483.1	nrdA	F	Provides the precursors necessary for DNA synthesis. Catalyzes the biosynthesis of deoxyribonucleotides from the corresponding ribonucleotides
WP_000143214.1
WP_000076440.1		K	COG0745 Response regulators consisting of a CheY-like receiver domain and a winged-helix DNA-binding domain
WP_000226706.1		T	PhoQ Sensor
WP_011858483.1
WP_016685607.1	yneF	T	diguanylate cyclase
WP_002000166.1	nuoA	C	NDH-1 shuttles electrons from NADH, via FMN and iron- sulfur (Fe-S) centers, to quinones in the respiratory chain. The immediate electron acceptor for the enzyme in this species is believed to be ubiquinone. Couples the redox reaction to proton translocation (for every two electrons transferred, four hydrogen ions are translocated across the cytoplasmic membrane), and thus conserves the redox ene…
WP_000878003.1	nuoB	C	NDH-1 shuttles electrons from NADH, via FMN and iron- sulfur (Fe-S) centers, to quinones in the respiratory chain. The immediate electron acceptor for the enzyme in this species is believed to be ubiquinone. Couples the redox reaction to proton translocation (for every two electrons transferred, four hydrogen ions are translocated across the cytoplasmic membrane), and thus conserves the redox ene…
WP_047479900.1	nuoC	C	NDH-1 shuttles electrons from NADH, via FMN and iron- sulfur (Fe-S) centers, to quinones in the respiratory chain. The immediate electron acceptor for the enzyme in this species is believed to be ubiquinone. Couples the redox reaction to proton translocation (for every two electrons transferred, four hydrogen ions are translocated across the cytoplasmic membrane), and thus conserves the redox ene…
WP_000973142.1	nuoE	C	Thioredoxin-like [2Fe-2S] ferredoxin
WP_001091098.1	nuoF	C	NDH-1 shuttles electrons from NADH, via FMN and iron- sulfur (Fe-S) centers, to quinones in the respiratory chain
WP_000190957.1	nuoG	C	COG1034 NADH dehydrogenase NADH ubiquinone oxidoreductase 75 kD subunit (chain G)
WP_001070989.1	nuoH	C	NDH-1 shuttles electrons from NADH, via FMN and iron- sulfur (Fe-S) centers, to quinones in the respiratory chain. The immediate electron acceptor for the enzyme in this species is believed to be ubiquinone. Couples the redox reaction to proton translocation (for every two electrons transferred, four hydrogen ions are translocated across the cytoplasmic membrane), and thus conserves the redox ene…
WP_000276693.1	nuoI	C	NDH-1 shuttles electrons from NADH, via FMN and iron- sulfur (Fe-S) centers, to quinones in the respiratory chain. The immediate electron acceptor for the enzyme in this species is believed to be ubiquinone. Couples the redox reaction to proton translocation (for every two electrons transferred, four hydrogen ions are translocated across the cytoplasmic membrane), and thus conserves the redox ene…
WP_014205902.1	nuoJ	C	Belongs to the complex I subunit 6 family
WP_000529822.1	nuoK	C	NDH-1 shuttles electrons from NADH, via FMN and iron- sulfur (Fe-S) centers, to quinones in the respiratory chain. The immediate electron acceptor for the enzyme in this species is believed to be ubiquinone. Couples the redox reaction to proton translocation (for every two electrons transferred, four hydrogen ions are translocated across the cytoplasmic membrane), and thus conserves the redox ene…
WP_000121137.1	nuoL	CP	COG1009 NADH ubiquinone oxidoreductase subunit 5 (chain L) Multisubunit Na H antiporter, MnhA subunit
WP_000429844.1	nuoM	C	COG1008 NADH ubiquinone oxidoreductase subunit 4 (chain M)
WP_001011955.1	nuoN	C	NDH-1 shuttles electrons from NADH, via FMN and iron- sulfur (Fe-S) centers, to quinones in the respiratory chain. The immediate electron acceptor for the enzyme in this species is believed to be ubiquinone. Couples the redox reaction to proton translocation (for every two electrons transferred, four hydrogen ions are translocated across the cytoplasmic membrane), and thus conserves the redox ene…
WP_001007343.1	upp	F	Catalyzes the conversion of uracil and 5-phospho-alpha- D-ribose 1-diphosphate (PRPP) to UMP and diphosphate
WP_000806837.1	cspE	K	Cold shock protein domain
WP_001242992.1	yeiE	K	LysR substrate binding domain
WP_047479904.1	fpr	C	Oxidoreductase NAD-binding domain
WP_002000170.1
WP_047479907.1
WP_001001666.1	ygxB	M	Conserved TM helix
WP_000742883.1
WP_045900378.1	yhiN	S	HI0933-like protein
WP_045900377.1	acdS	E	Pyridoxal-phosphate dependent enzyme
WP_001278631.1		V	Barrel-sandwich domain of CusB or HlyD membrane-fusion
WP_016654353.1		EGP	Major facilitator superfamily
WP_047479915.1		K	Bacterial regulatory proteins, tetR family
WP_000463103.1		E	LysE type translocator
WP_001261036.1
WP_001226772.1	metG	J	Is required not only for elongation of protein synthesis but also for the initiation of all mRNA translation through initiator tRNA(fMet) aminoacylation
WP_000206127.1		M	Membrane
WP_000118693.1	mrp	D	Binds and transfers iron-sulfur (Fe-S) clusters to target apoproteins. Can hydrolyze ATP
WP_047479925.1	mtnN	F	Phosphorylase superfamily
WP_000605098.1	TLL0138	S	Uncharacterized protein conserved in bacteria (DUF2062)
WP_000626777.1	pltP	E	LysE type translocator
WP_000985728.1	dcd	F	Belongs to the dCTP deaminase family
WP_001248745.1
WP_047479928.1
WP_000724344.1
WP_086230997.1
WP_032047135.1
WP_000398776.1	dusC	J	Catalyzes the synthesis of 5,6-dihydrouridine (D), a modified base found in the D-loop of most tRNAs, via the reduction of the C5-C6 double bond in target uridines. Specifically modifies U16 in tRNAs
725	ypjD	S	Cytochrome C assembly protein
726	ffh	U	Involved in targeting and insertion of nascent membrane proteins into the cytoplasmic membrane. Binds to the hydrophobic signal sequence of the ribosome-nascent chain (RNC) as it emerges from the ribosomes. The SRP-RNC complex is then targeted to the cytoplasmic membrane where it interacts with the SRP receptor FtsY. Interaction with FtsY leads to the transfer of the RNC complex to the Sec transl…
WP_000839418.1	coaX	F	Catalyzes the phosphorylation of pantothenate (Pan), the first step in CoA biosynthesis
WP_047479935.1	birA	H	Biotin/lipoate A/B protein ligase family
WP_000420176.1		S	membrane transporter protein
WP_001047228.1		K	FCD domain
WP_047479937.1	smc	D	Required for chromosome condensation and partitioning
WP_000405216.1	zipA	D	Essential cell division protein that stabilizes the FtsZ protofilaments by cross-linking them and that serves as a cytoplasmic membrane anchor for the Z ring. Also required for the recruitment to the septal ring of downstream cell division proteins
WP_001018842.1	ligA	L	DNA ligase that catalyzes the formation of phosphodiester linkages between 5'-phosphoryl and 3'-hydroxyl groups in double-stranded DNA using NAD as a coenzyme and as the energy source for the reaction. It is essential for DNA replication and repair of damaged DNA
WP_001214863.1	bfrA	P	Iron-storage protein, whose ferroxidase center binds Fe(2 ) ions, oxidizes them by dioxygen to Fe(3 ), and participates in the subsequent Fe(3 ) oxide mineral core formation within the central cavity of the protein complex
WP_001992131.1		G	Major Facilitator Superfamily
WP_002000179.1	otsA	G	Glycosyltransferase family 20
WP_047479939.1	otsB	G	Removes the phosphate from trehalose 6-phosphate to produce free trehalose
WP_047479941.1	bioH	S	hydrolases or acyltransferases (alpha beta hydrolase superfamily)
WP_000131431.1	bioA	H	Catalyzes the transfer of the alpha-amino group from S- adenosyl-L-methionine (SAM) to 7-keto-8-aminopelargonic acid (KAPA) to form 7,8-diaminopelargonic acid (DAPA). It is the only animotransferase known to utilize SAM as an amino donor
WP_000054326.1	bioF	E	8-amino-7-oxononanoate synthase
WP_047479944.1	bioC	H	Converts the free carboxyl group of a malonyl-thioester to its methyl ester by transfer of a methyl group from S-adenosyl- L-methionine (SAM). It allows to synthesize pimeloyl-ACP via the fatty acid synthetic pathway
WP_000016592.1	bioD	H	Catalyzes a mechanistically unusual reaction, the ATP- dependent insertion of CO2 between the N7 and N8 nitrogen atoms of 7,8-diaminopelargonic acid (DAPA) to form an ureido ring
WP_001291249.1	rluB	J	Belongs to the pseudouridine synthase RsuA family
WP_045900367.1	scpB	D	Participates in chromosomal partition during cell division. May act via the formation of a condensin-like complex containing Smc and ScpA that pull DNA away from mid-cell into both cell halves
WP_000390423.1	scpA	D	Participates in chromosomal partition during cell division. May act via the formation of a condensin-like complex containing Smc and ScpB that pull DNA away from mid-cell into both cell halves
WP_000902818.1	yciO	J	Belongs to the SUA5 family
WP_171057185.1	yfcM	S	Elongation factor P hydroxylase
WP_001275712.1	yceD	S	Uncharacterized ACR, COG1399
WP_000290730.1	rpmF	J	Belongs to the bacterial ribosomal protein bL32 family
WP_001274818.1	fabD	I	malonyl CoA-acyl carrier protein transacylase
WP_000191300.1		IQ	KR domain
WP_001279871.1	acpP	IQ	Carrier of the growing fatty acid chain in fatty acid biosynthesis
WP_000522216.1	ygaU	S	BON domain
WP_001247940.1	thiD	H	Phosphomethylpyrimidine kinase
WP_045900362.1	MA20_36165	S	HAD-hyrolase-like
WP_000096537.1	ribB	H	Catalyzes the conversion of D-ribulose 5-phosphate to formate and 3,4-dihydroxy-2-butanone 4-phosphate
WP_045900360.1		S	Domain of unknown function (DUF4401)
WP_000716106.1		S	GDYXXLXY protein
WP_000952664.1	panD	H	Catalyzes the pyruvoyl-dependent decarboxylation of aspartate to produce beta-alanine
WP_000065594.1	pth	J	The natural substrate for this enzyme may be peptidyl- tRNAs which drop off the ribosome during protein synthesis
WP_001273421.1	ctc	J	This is one of the proteins that binds to the 5S RNA in the ribosome where it forms part of the central protuberance
WP_001133287.1	prs	F	Involved in the biosynthesis of the central metabolite phospho-alpha-D-ribosyl-1-pyrophosphate (PRPP) via the transfer of pyrophosphoryl group from ATP to 1-hydroxyl of ribose-5-phosphate (Rib-5-P)
WP_047479951.1	ispE	F	Catalyzes the phosphorylation of the position 2 hydroxy group of 4-diphosphocytidyl-2C-methyl-D-erythritol
WP_000039823.1	lolB	M	Plays a critical role in the incorporation of lipoproteins in the outer membrane after they are released by the LolA protein
WP_000100660.1		NU	COG0457 FOG TPR repeat
WP_000007423.1	hemA	H	Catalyzes the NADPH-dependent reduction of glutamyl- tRNA(Glu) to glutamate 1-semialdehyde (GSA)
WP_023897236.1	dnaG	L	RNA polymerase that catalyzes the synthesis of short RNA molecules used as primers for DNA polymerase during DNA replication
WP_017816691.1	bamD	M	Part of the outer membrane protein assembly complex, which is involved in assembly and insertion of beta-barrel proteins into the outer membrane
WP_047479955.1	rluD	J	Responsible for synthesis of pseudouridine from uracil
WP_000397525.1	yfiH	S	Belongs to the multicopper oxidase YfiH RL5 family
WP_000056378.1		S	Flavodoxin domain
WP_001029798.1	smpB	O	the 2 termini fold to resemble tRNA(Ala) and it encodes a tag peptide , a short internal open reading frame. During trans-translation Ala- aminoacylated tmRNA acts like a tRNA, entering the A-site of stalled ribosomes, displacing the stalled mRNA. The ribosome then switches to translate the ORF on the tmRNA
WP_000047853.1	coaD	H	Reversibly transfers an adenylyl group from ATP to 4'- phosphopantetheine, yielding dephospho-CoA (dPCoA) and pyrophosphate
WP_001979799.1	fdx1	C	Ferredoxin
WP_000830716.1		U	hemolysin activation secretion protein
WP_002067776.1	ttdR	K	LysR substrate binding domain
WP_001129656.1	dmlA	CE	Isocitrate/isopropylmalate dehydrogenase
WP_086222352.1	yeaV	M	BCCT, betaine/carnitine/choline family transporter
WP_047479961.1		I	Pfam:DUF2424
WP_001277084.1	yeaW	P	Ring hydroxylating alpha subunit (catalytic domain)
WP_047479964.1	gabD	C	Involved in the biosynthesis of the osmoprotectant glycine betaine. Catalyzes the reversible oxidation of betaine aldehyde to the corresponding acid
WP_169518018.1	yeaX	C	2Fe-2S iron-sulfur cluster binding domain
WP_000139297.1
WP_000834616.1	nadE	H	Catalyzes the ATP-dependent amidation of deamido-NAD to form NAD. Uses L-glutamine as a nitrogen source
WP_001048150.1
WP_000838084.1		S	Belongs to the pirin family
WP_000339889.1		S	Uncharacterised protein family (UPF0093)
WP_047479970.1	fabB	IQ	Belongs to the beta-ketoacyl-ACP synthases family
WP_152562447.1		C	EcsC protein family
WP_000246374.1		J	structural constituent of ribosome
WP_001138055.1	rpsG	J	One of the primary rRNA binding proteins, it binds directly to 16S rRNA where it nucleates assembly of the head domain of the 30S subunit. Is located at the subunit interface close to the decoding center, probably blocks exit of the E-site tRNA
WP_000113824.1	fusA	J	Catalyzes the GTP-dependent ribosomal translocation step during translation elongation. During this step, the ribosome changes from the pre-translocational (PRE) to the post- translocational (POST) state as the newly formed A-site-bound peptidyl-tRNA and P-site-bound deacylated tRNA move to the P and E sites, respectively. Catalyzes the coordinated movement of the two tRNA molecules, the mRNA and…
WP_001029610.1	tuf	J	This protein promotes the GTP-dependent binding of aminoacyl-tRNA to the A-site of ribosomes during protein biosynthesis
WP_000992299.1		S	Predicted metal-dependent hydrolase
WP_000992291.1		S	Predicted metal-dependent hydrolase
WP_000621542.1	rimI	K	This enzyme acetylates the N-terminal alanine of ribosomal protein S18
WP_000844343.1	ate	O	May conjugate Arg from its aminoacyl-tRNA to the N- termini of proteins containing an N-terminal aspartate or glutamate
WP_033852129.1	aat	O	Functions in the N-end rule pathway of protein degradation where it conjugates Leu, Phe and, less efficiently, Met from aminoacyl-tRNAs to the N-termini of proteins containing an N-terminal arginine or lysine
WP_001276144.1	trxB	C	Belongs to the class-II pyridine nucleotide-disulfide oxidoreductase family
WP_000127824.1	ftsK	D	Ftsk_gamma
WP_000959263.1	rhtC	E	LysE type translocator
WP_001218560.1
WP_000896934.1	minE	D	Prevents the cell division inhibition by proteins MinC and MinD at internal division sites while permitting inhibition at polar sites. This ensures cell division at the proper site by restricting the formation of a division septum at the midpoint of the long axis of the cell
804	minD	D	Belongs to the ParA family
WP_152562420.1	minC	D	Cell division inhibitor that blocks the formation of polar Z ring septums. Rapidly oscillates between the poles of the cell to destabilize FtsZ filaments that have formed before they mature into polar Z rings. Prevents FtsZ polymerization
WP_001181644.1
WP_000100967.1		I	Phosphate acyltransferases
WP_001202415.1	yiaD	M	Belongs to the ompA family
WP_000093035.1	rep	L	it can initiate unwinding at a nick in the DNA. It binds to the single-stranded DNA and acts in a progressive fashion along the DNA in the 3' to 5' direction
WP_000868152.1	dut	F	This enzyme is involved in nucleotide metabolism it produces dUMP, the immediate precursor of thymidine nucleotides and it decreases the intracellular concentration of dUTP so that uracil cannot be incorporated into DNA
WP_001102833.1	algC	G	Phosphoglucomutase/phosphomannomutase, alpha/beta/alpha domain III
WP_001135419.1	argB	E	Belongs to the acetylglutamate kinase family. ArgB subfamily
WP_000890283.1	olsB	S	Acetyltransferase (GNAT) domain
WP_000336554.1	yafJ	S	glutamine amidotransferase
WP_047479986.1		P	Hemerythrin HHE cation binding domain
WP_002084046.1
WP_000442585.1	rnfH	S	Belongs to the UPF0125 (RnfH) family
WP_001170994.1	bamE	J	Part of the outer membrane protein assembly complex, which is involved in assembly and insertion of beta-barrel proteins into the outer membrane
WP_001122847.1	fur	K	Belongs to the Fur family
WP_047479990.1	pilU	NU	Type II/IV secretion system protein
WP_000220756.1	pilT	NU	twitching motility protein
WP_047479993.1	yggS	S	Pyridoxal 5'-phosphate (PLP)-binding protein, which is involved in PLP homeostasis
WP_047479996.1	sbcC	L	Putative exonuclease SbcCD, C subunit
WP_047479999.1	sbcD	L	SbcCD cleaves DNA hairpin structures. These structures can inhibit DNA replication and are intermediates in certain DNA recombination reactions. The complex acts as a 3'- 5' double strand exonuclease that can open hairpins. It also has a 5' single-strand endonuclease activity
WP_085944027.1	ymaD	O	OsmC-like protein
WP_001091952.1		S	Glyoxalase-like domain
WP_000164152.1
WP_047480005.1	yfcH	S	Domain of unknown function (DUF1731)
WP_047480008.1	thiO	E	FAD dependent oxidoreductase
WP_000222569.1	hemB	H	Belongs to the ALAD family
WP_000539514.1	yigI	Q	Thioesterase superfamily
WP_000128703.1	emrA	V	HlyD membrane-fusion protein of T1SS
WP_171126847.1	ggt	M	Gamma-glutamyltranspeptidase
WP_047480017.1
WP_079378433.1	hsdR	L	Type I site-specific restriction-modification system R (restriction) subunit and related helicases
WP_047480023.1	hsdM	V	COG0286 Type I restriction-modification system methyltransferase subunit
WP_079378434.1		V	Type I restriction modification DNA specificity domain
WP_047480026.1		L	Domain of unknown function (DUF4357)
WP_000675278.1
WP_047480030.1		S	outer membrane porin, OprD family
WP_038405490.1		EGP	Uncharacterised MFS-type transporter YbfB
WP_000050871.1	dapA2	EM	Dihydrodipicolinate synthetase family
WP_047480035.1		K	LysR substrate binding domain
WP_152562421.1	ylaC_1	K	ECF sigma factor
WP_047480041.1		PT	FecR protein
WP_152562448.1	FrpB2	P	Secretin and TonB N terminus short domain
WP_001991318.1		S	C-lobe and N-lobe beta barrels of Tf-binding protein B
WP_152562449.1	trxA	O	Protein of unknown function (DUF560)
WP_000837758.1		M	Gram-negative bacterial TonB protein C-terminal
WP_002000381.1	hemO	P	Heme oxygenase
WP_047480050.1	ybaN	S	membrane
WP_000061137.1
WP_001115352.1		S	Protein of unknown function (DUF1275)
WP_161782817.1		S	Putative serine esterase (DUF676)
WP_045544478.1	ydgI	E	Amino acid permease
WP_000696108.1	mmuM	H	Homocysteine S-methyltransferase
WP_047480056.1
WP_047480058.1	mqo	C	Malate:quinone oxidoreductase (Mqo)
WP_047480060.1	betA	E	Involved in the biosynthesis of the osmoprotectant glycine betaine. Catalyzes the oxidation of choline to betaine aldehyde and betaine aldehyde to glycine betaine at the same rate
WP_001286303.1	betB	C	Involved in the biosynthesis of the osmoprotectant glycine betaine. Catalyzes the reversible oxidation of betaine aldehyde to the corresponding acid
WP_001985959.1	betI	K	Repressor involved in choline regulation of the bet genes
WP_000243373.1	betT	U	BCCT, betaine/carnitine/choline family transporter
WP_047480063.1	betT	M	Belongs to the BCCT transporter (TC 2.A.15) family
WP_000254582.1	IV02_12955	U	MarC family integral membrane protein
WP_001142469.1	vdlD	I	Thioesterase superfamily
WP_002123534.1	yeiR	S	CobW/HypB/UreG, nucleotide-binding domain
WP_000267728.1	dctA	U	Belongs to the dicarboxylate amino acid cation symporter (DAACS) (TC 2.A.23) family
WP_001185269.1	yaeQ	S	YaeQ
WP_000627259.1	ytfC	G	Peptidyl-prolyl cis-trans
WP_000632825.1	pgaB	G	Hypothetical glycosyl hydrolase family 13
WP_000151613.1	pgaC	M	Glycosyl transferase family 21
WP_002000370.1		S	PgaD-like protein
WP_039208195.1		I	Enoyl-CoA hydratase/isomerase
WP_000074693.1	pnuC	H	Nicotinamide mononucleotide transporter
WP_000927114.1
WP_000051057.1		K	helix_turn_helix isocitrate lyase regulation
881	ndoA	P	Rieske-like [2Fe-2S] domain
WP_000847096.1
WP_000991783.1	carAa	P	Rieske [2Fe-2S] domain
884		IQ	KR domain
WP_000627784.1	todE	E	Glyoxalase/Bleomycin resistance protein/Dioxygenase superfamily
WP_047480068.1	padH	C	Reductase C-terminal
WP_000064049.1	sauU	G	MFS/sugar transport protein
WP_000211626.1		G	Cupin
WP_000988621.1		I	Ndr family
WP_047480071.1		IQ	Enoyl-(Acyl carrier protein) reductase
WP_000735778.1	nadX	H	Specifically catalyzes the NAD or NADP-dependent dehydrogenation of L-aspartate to iminoaspartate
WP_001040549.1	aldA	C	Involved in the biosynthesis of the osmoprotectant glycine betaine. Catalyzes the reversible oxidation of betaine aldehyde to the corresponding acid
WP_047480074.1		EH	Thiamine pyrophosphate enzyme, central domain
WP_083009513.1		P	phosphate-selective porin O and P
WP_000371873.1	cjaB	EGP	Major facilitator superfamily
WP_000117817.1	def2	J	Removes the formyl group from the N-terminal Met of newly synthesized proteins. Requires at least a dipeptide for an efficient rate of reaction. N-terminal L-methionine is a prerequisite for activity but the enzyme has broad specificity at other positions
WP_000856713.1	glsA	E	Belongs to the glutaminase family
WP_001285131.1	MA20_01125	K	helix_turn_helix, arabinose operon control protein
WP_170825899.1	fsr	P	Major Facilitator Superfamily
WP_032028081.1	mro	M	Converts alpha-aldose to the beta-anomer
WP_047480079.1
WP_086443114.1		K	LysR substrate binding domain
WP_000926505.1		IQ	KR domain
WP_078220340.1		G	COG0477 Permeases of the major facilitator superfamily
WP_152562450.1	tktB	G	Transketolase, thiamine diphosphate binding domain
WP_047480089.1	IV02_09720	G	Transketolase, pyrimidine binding domain
WP_047480092.1	metH	E	B12 binding domain
WP_115423553.1	pitA	P	Phosphate transporter family
WP_047480094.1	dsdA	E	Belongs to the serine threonine dehydratase family. DsdA subfamily
WP_025467631.1		S	mannose-ethanolamine phosphotransferase activity
WP_000854551.1
WP_152562451.1	pkn1	S	Sulfatase-modifying factor enzyme 1
WP_047480103.1	atsA	P	Sulfatase
WP_000902942.1		S	Rhomboid family
WP_000102721.1	nfuA	C	Involved in iron-sulfur cluster biogenesis. Binds a 4Fe- 4S cluster, can transfer this cluster to apoproteins, and thereby intervenes in the maturation of Fe S proteins. Could also act as a scaffold chaperone for damaged Fe S proteins
WP_047480105.1	bfeA	P	TonB dependent receptor
WP_047480108.1		Q	D-alanine [D-alanyl carrier protein] ligase activity
WP_000197536.1		I	Serine aminopeptidase, S33
WP_001987747.1	cah	P	Reversible hydration of carbon dioxide
WP_031946819.1	tesA	E	GDSL-like Lipase/Acylhydrolase family
WP_002069598.1	ybbA	Q	ABC transporter
WP_047480117.1	ybbP	Q	FtsX-like permease family
WP_047480122.1	aarA	S	Rhomboid family
WP_047480125.1	mtgA	M	Peptidoglycan polymerase that catalyzes glycan chain elongation from lipid-linked precursors
WP_001090302.1	ppk	H	Catalyzes the reversible transfer of the terminal phosphate of ATP to form a long-chain polyphosphate (polyP)
WP_161782818.1		S	Sporulation related domain
WP_000729506.1	oxyR	K	Transcriptional regulator
WP_085941190.1	estB	E	Serine aminopeptidase, S33
WP_047480128.1	rubB	C	Pyridine nucleotide-disulphide oxidoreductase
WP_000760495.1	rubA	C	Rubredoxin
WP_000449050.1		S	Activator of Hsp90 ATPase homolog 1-like protein
WP_047480131.1	ycfP	S	Uncharacterised protein family (UPF0227)
WP_001128165.1	lysS	J	Belongs to the class-II aminoacyl-tRNA synthetase family
WP_045900844.1		P	Capsule assembly protein Wzi
WP_002011285.1
WP_000140408.1	cysD	H	Sulfate adenylyltransferase subunit 2
WP_031962912.1	cysN	H	Belongs to the TRAFAC class translation factor GTPase superfamily. Classic translation factor GTPase family. CysN NodQ subfamily
WP_031379492.1		S	Uncharacterized protein conserved in bacteria (DUF2239)
WP_000462918.1
WP_000956799.1	citN	C	Citrate transporter
WP_000051871.1	ytfL	P	Domain of unknown function DUF21
WP_001047619.1		K	Transcriptional regulator
WP_000214787.1	aceA	C	Isocitrate lyase
WP_047480139.1	nlpE	MP	NlpE N-terminal domain
WP_000960939.1
WP_001171099.1	ureD	O	Required for maturation of urease via the functional incorporation of the urease nickel metallocenter
WP_000422460.1	ureA	E	Belongs to the urease gamma subunit family
WP_000612144.1	ureB	E	Belongs to the urease beta subunit family
WP_000784158.1	ureC	E	Belongs to the metallo-dependent hydrolases superfamily. Urease alpha subunit family
WP_000708730.1	ureE	O	Involved in urease metallocenter assembly. Binds nickel. Probably functions as a nickel donor during metallocenter assembly
WP_000103635.1	ureF	O	Required for maturation of urease via the functional incorporation of the urease nickel metallocenter
WP_000140200.1	ureG	KO	Facilitates the functional incorporation of the urease nickel metallocenter. This process requires GTP hydrolysis, probably effectuated by UreG
WP_001009277.1	ureJ	O	HupE / UreJ protein
WP_000795844.1	rsmD	J	Specifically methylates the guanine in position 966 of 16S rRNA in the assembled 30S particle
WP_000809152.1	mrdA	M	Belongs to the transpeptidase family. MrdA subfamily
WP_001227325.1
WP_171126849.1		S	protein conserved in bacteria
WP_014462713.1	adk	F	Catalyzes the reversible transfer of the terminal phosphate group between ATP and AMP. Plays an important role in cellular energy homeostasis and in adenine nucleotide metabolism
WP_001990669.1	nth	L	DNA repair enzyme that has both DNA N-glycosylase activity and AP-lyase activity. The DNA N-glycosylase activity releases various damaged pyrimidines from DNA by cleaving the N- glycosidic bond, leaving an AP (apurinic apyrimidinic) site. The AP-lyase activity cleaves the phosphodiester bond 3' to the AP site by a beta-elimination, leaving a 3'-terminal unsaturated sugar and a product with a term…
WP_001069886.1	rnfB	C	Part of a membrane complex involved in electron transport
WP_103891285.1	gdhA	E	Belongs to the Glu Leu Phe Val dehydrogenases family
WP_047480149.1		O	Domain of unknown function (DUF4377)
WP_000423001.1		S	Catalytic LigB subunit of aromatic ring-opening dioxygenase
WP_000702193.1	rlmH	J	Specifically methylates the pseudouridine at position 1915 (m3Psi1915) in 23S rRNA
WP_047480151.1	lon	O	ATP-dependent serine protease that mediates the selective degradation of mutant and abnormal proteins as well as certain short-lived regulatory proteins. Required for cellular homeostasis and for survival from DNA damage and developmental changes induced by stress. Degrades polypeptides processively to yield small peptide fragments that are 5 to 10 amino acids long. Binds to DNA in a double-stran…
WP_047480153.1		UW	Coiled stalk of trimeric autotransporter adhesin
WP_047480156.1	plpD	M	SmpA / OmlA family
971	ygfA	H	Belongs to the 5-formyltetrahydrofolate cyclo-ligase family
WP_000768346.1
WP_000669361.1
WP_000003719.1	zapA	D	Activator of cell division through the inhibition of FtsZ GTPase activity, therefore promoting FtsZ assembly into bundles of protofilaments necessary for the formation of the division Z ring. It is recruited early at mid-cell but it is not essential for cell division
WP_000893185.1
WP_001150153.1	ygfB	S	Belongs to the UPF0149 family
WP_000775471.1	pepP	E	Belongs to the peptidase M24B family
WP_047480159.1	ubiH	CH	FAD binding domain
WP_017816660.1	visC	CH	Squalene epoxidase
WP_000129799.1
WP_000058927.1		K	helix_turn_helix, mercury resistance
WP_000896586.1		P	Cation efflux family
WP_031954095.1	lysE	S	LysE type translocator
WP_000887362.1	argP	K	LysR substrate binding domain
WP_000140376.1
WP_001275994.1	rsmI	H	Catalyzes the 2'-O-methylation of the ribose of cytidine 1402 (C1402) in 16S rRNA
WP_000959396.1	yraN	L	Belongs to the UPF0102 family
WP_000919363.1	yraP	S	BON domain
WP_001048902.1		I	Carboxylesterase family
WP_001292948.1	nudC	L	NADH pyrophosphatase zinc ribbon domain
WP_001289243.1		T	Histidine kinase
WP_000084042.1	dnaQ	L	Endonuclease that specifically degrades the RNA of RNA- DNA hybrids
WP_000277832.1	mltD	M	COG0741 Soluble lytic murein transglycosylase and related regulatory proteins (some contain LysM invasin domains)
WP_152562452.1	yejA	E	Bacterial extracellular solute-binding proteins, family 5 Middle
WP_000536102.1	yejB	P	Binding-protein-dependent transport system inner membrane component
WP_047480166.1	yejE	P	Binding-protein-dependent transport system inner membrane component
WP_047480169.1	yejF2	P	Belongs to the ABC transporter superfamily
WP_047480171.1		C	NADH:flavin oxidoreductase / NADH oxidase family
WP_047480174.1		P	TonB dependent receptor
WP_001982681.1	rnt	L	Trims short 3' overhangs of a variety of RNA species, leaving a one or two nucleotide 3' overhang. Responsible for the end-turnover of tRNA specifically removes the terminal AMP residue from uncharged tRNA (tRNA-C-C-A). Also appears to be involved in tRNA biosynthesis
WP_001084867.1	pyrC	F	Catalyzes the reversible cyclization of carbamoyl aspartate to dihydroorotate
WP_000013374.1	pleD	T	diguanylate cyclase
WP_001986427.1	argG	E	Belongs to the argininosuccinate synthase family. Type
WP_000205090.1	fadH	C	2,4-dienoyl-coA reductase
WP_000732870.1	metQ_4	P	NLPA lipoprotein
WP_079378436.1		K	Bacterial regulatory proteins, tetR family
WP_047480182.1		S	Phage late control gene D protein (GPD)
WP_002048000.1		M	COG3209 Rhs family protein
WP_002047998.1
WP_025467893.1
WP_002048001.1
WP_025467892.1
WP_025467891.1
WP_002048007.1
WP_025467890.1
1018
1019
WP_002048006.1
WP_002048002.1	csgG	M	Curli production assembly/transport component CsgG
WP_002047997.1	Z012_10670	S	Domain of unknown function (DUF4810)
WP_002047990.1	VY92_06375	S	Putative bacterial lipoprotein (DUF799)
WP_000416091.1
WP_079267361.1	aroP	E	Amino acid permease
WP_047480191.1		E	FAD dependent oxidoreductase
WP_000428067.1	puuP	E	Amino acid permease
WP_045900744.1		K	Cache domain
WP_001277431.1		K	Transcriptional regulator
WP_032060853.1		S	SnoaL-like polyketide cyclase
WP_047480198.1	ydcW	C	Aldehyde dehydrogenase family
WP_002001056.1		K	DeoR-like helix-turn-helix domain
WP_045900741.1	argD	E	acetylornithine aminotransferase
WP_045900740.1	astA	E	Arginine N-succinyltransferase beta subunit
WP_085940581.1	cycA	E	Amino acid permease
WP_047480203.1	calB	C	belongs to the aldehyde dehydrogenase family
WP_047480206.1		K	Arabinose-binding domain of AraC transcription regulator, N-term
WP_000358189.1
1039		EG	EamA-like transporter family
WP_024439149.1	garD	G	D-galactarate dehydratase / Altronate hydrolase, C terminus
WP_047480210.1	gudP	G	Major Facilitator Superfamily
WP_047480213.1	gudD	H	Mandelate racemase / muconate lactonizing enzyme, C-terminal domain
WP_000339249.1	kdgD	EM	Belongs to the DapA family
WP_045900726.1	aldH	C	Aldehyde dehydrogenase family
WP_000092890.1	IV02_29395	K	FCD
WP_033852913.1	hcaG	S	Tannase and feruloyl esterase
WP_000372416.1		Q	Thioesterase-like superfamily
WP_000758280.1	MA20_18690	S	Protein of unknown function (DUF3237)
WP_125535337.1		S	outer membrane porin, OprD family
WP_045900720.1	hcaD	C	Acyl-CoA dehydrogenase, C-terminal domain
WP_171126836.1	fcs	IQ	AMP-binding enzyme
WP_047480219.1	vdh	C	belongs to the aldehyde dehydrogenase family
WP_002040868.1	hcaA	I	Belongs to the enoyl-CoA hydratase isomerase family
WP_000411715.1	mhpT	EGP	Major facilitator Superfamily
WP_000252463.1	hcaR	K	helix_turn_helix multiple antibiotic resistance protein
WP_086261696.1	vanR	K	FCD
WP_047480223.1	vanB	C	2Fe-2S iron-sulfur cluster binding domain
WP_031993539.1	vanA	P	Rieske [2Fe-2S] domain
WP_047480225.1	vanK	EGP	Major facilitator Superfamily
WP_171126851.1		S	outer membrane porin, OprD family
WP_047480229.1	choD	E	GMC oxidoreductase
WP_023897043.1		I	Steryl acetyl hydrolase
WP_000834594.1		IQ	KR domain
WP_023897042.1		P	Flavin-binding monooxygenase-like
WP_047480232.1		K	Arabinose-binding domain of AraC transcription regulator, N-term
WP_000658008.1		H	Exhibits S-adenosyl-L-methionine-dependent methyltransferase activity
WP_004841868.1		P	Flavin-binding monooxygenase-like
WP_000600019.1		S	Belongs to the short-chain dehydrogenases reductases (SDR) family
WP_000626177.1		S	Predicted metal-dependent hydrolase
WP_000107496.1		K	Bacterial regulatory proteins, tetR family
WP_000459999.1		S	Belongs to the pirin family
WP_045544375.1		S	Predicted metal-dependent hydrolase
WP_032025781.1	ephD	S	KR domain
WP_000256752.1		P	Flavin-binding monooxygenase-like
WP_002011768.1
WP_000729980.1	purP	S	Permease family
WP_001077405.1	add	F	Catalyzes the hydrolytic deamination of adenine to hypoxanthine. Plays an important role in the purine salvage pathway and in nitrogen catabolism
WP_004841854.1	cybB	C	Prokaryotic cytochrome b561
WP_000735756.1
WP_045900694.1	rnhB	L	Endonuclease that specifically degrades the RNA of RNA- DNA hybrids
WP_000906487.1	csrA	T	Could accelerate the degradation of some genes transcripts potentially through selective RNA binding
WP_001185176.1	lysC	E	Belongs to the aspartokinase family
WP_000199457.1	alaS	J	Catalyzes the attachment of alanine to tRNA(Ala) in a two-step reaction alanine is first activated by ATP to form Ala- AMP and then transferred to the acceptor end of tRNA(Ala). Also edits incorrectly charged Ser-tRNA(Ala) and Gly-tRNA(Ala) via its editing domain
WP_001188822.1	gapA	G	Belongs to the glyceraldehyde-3-phosphate dehydrogenase family
WP_000671271.1
WP_047480242.1	hisZ	E	Required for the first step of histidine biosynthesis. May allow the feedback regulation of ATP phosphoribosyltransferase activity by histidine
WP_000517792.1	purA	F	Plays an important role in the de novo pathway of purine nucleotide biosynthesis. Catalyzes the first committed step in the biosynthesis of AMP from IMP
WP_000776215.1
WP_001034598.1	Z012_09445	M	Peptidase family M48
WP_001159809.1	tas	C	Aldo/keto reductase family
WP_000203217.1	crp	K	helix_turn_helix, cAMP Regulatory protein
WP_001195082.1	yhfA	O	OsmC-like protein
WP_001026241.1	phnO	K	Acetyltransferase (GNAT) domain
WP_047480246.1		M	Peptidase family M23
WP_001210050.1	clpB	O	Part of a stress-induced multi-chaperone system, it is involved in the recovery of the cell from heat-induced damage, in cooperation with DnaK, DnaJ and GrpE
WP_000941316.1	cinA	S	Belongs to the CinA family
WP_001060738.1
WP_001984968.1	rlmL	J	Specifically methylates the guanine in position 2445 (m2G2445) and the guanine in position 2069 (m7G2069) of 23S rRNA
WP_000655896.1
WP_000546639.1	pyrB	F	Belongs to the ATCase OTCase family
WP_085940548.1	pyrC	F	dihydroorotase
WP_000026487.1		M	OmpA family
WP_047480248.1		S	Rossmann-like domain
WP_047480251.1	yliJ	O	Glutathione S-transferase, N-terminal domain
WP_002011329.1	trmB	J	Catalyzes the formation of N(7)-methylguanine at position 46 (m7G46) in tRNA
WP_047480253.1		Q	Lamin Tail Domain
WP_000781337.1	gst	O	Belongs to the GST superfamily
WP_001037895.1
WP_000558745.1	ahpF	C	Alkyl hydroperoxide reductase
WP_000058246.1		S	Protein of unknown function (DUF1653)
WP_001133993.1	mdmC	S	O-methyltransferase
WP_000024050.1		S	KTSC domain
WP_001987180.1	ahpC	O	Alkyl hydroperoxide reductase
WP_045899934.1	hrpA	L	Helicase associated domain (HA2) Add an annotation
WP_000512836.1	fabH	I	synthase III
WP_045544345.1		S	outer membrane porin, OprD family
WP_045544344.1	benK	EGP	Major facilitator Superfamily
WP_047480259.1	benE	Q	Benzoate membrane transport protein
WP_047480261.1		IQ	Enoyl-(Acyl carrier protein) reductase
WP_031380284.1	pyrK	C	Oxidoreductase FAD-binding domain
WP_000107002.1	benB	Q	Ring hydroxylating beta subunit
WP_047480263.1	benA	P	Ring hydroxylating alpha subunit (catalytic domain)
WP_000423281.1	benM	K	Transcriptional regulator
WP_077164555.1	copZ	P	Heavy-metal-associated domain
WP_045899935.1		P	P-type ATPase
WP_001020650.1	cueR	K	helix_turn_helix, mercury resistance
WP_004747785.1		S	Glutathione-dependent formaldehyde-activating enzyme
WP_000980495.1
WP_000253374.1	pltP	E	LysE type translocator
WP_000825869.1
WP_000998196.1		S	Exonuclease VII small subunit
WP_047480266.1	xseA	L	Bidirectionally degrades single-stranded DNA into large acid-insoluble oligonucleotides, which are then degraded further into small acid-soluble oligonucleotides
WP_000636785.1
WP_001185369.1		K	Helix-turn-helix XRE-family like proteins
WP_045899939.1
WP_045899941.1
WP_001019697.1		S	Glycosyl hydrolase 108
WP_000015971.1		E	LysE type translocator
WP_000072673.1	cspV	K	'Cold-shock' DNA-binding domain
WP_047480272.1
WP_000932369.1	proC	E	Catalyzes the reduction of 1-pyrroline-5-carboxylate (PCA) to L-proline
WP_001982898.1
WP_001127325.1
WP_047480277.1
WP_047480280.1		S	Phage Mu protein F like protein
WP_047480283.1	ynfM_2	EGP	Major facilitator Superfamily
WP_031977188.1		K	HxlR-like helix-turn-helix
WP_001210983.1
WP_000644342.1	MA20_42090	S	Domain of unknown function (DUF4142)
WP_047480288.1
WP_000844428.1
WP_001017796.1
WP_043053882.1		S	Lysozyme inhibitor LprI
WP_001182278.1	cysS	J	Belongs to the class-I aminoacyl-tRNA synthetase family
WP_001133556.1	gutQ	M	Arabinose 5-phosphate isomerase
WP_000179337.1	kdsC	S	Involved in the biosynthesis of lipopolysaccharides (LPSs). Catalyzes the hydrolysis of 3-deoxy-D-manno-octulosonate 8-phosphate (KDO 8-P) to 3-deoxy-D-manno-octulosonate (KDO) and inorganic phosphate
WP_000381220.1	lptC	S	Lipopolysaccharide-assembly, LptC-related
WP_000554244.1	lptA	S	Involved in the assembly of lipopolysaccharide (LPS). Required for the translocation of LPS from the inner membrane to the outer membrane. May form a bridge between the inner membrane and the outer membrane, via interactions with LptC and LptD, thereby facilitating LPS transfer across the periplasm
WP_001183458.1	lptB	S	ABC transporter
1162		MU	Outer membrane efflux protein
WP_015451474.1		MU	Outer membrane efflux protein
WP_000988402.1		V	ABC transporter transmembrane region
WP_000003555.1		M	HlyD membrane-fusion protein of T1SS
WP_000885988.1	yigZ	S	Uncharacterized protein family UPF0029
WP_000132356.1	lacA	S	Hexapeptide repeat of succinyl-transferase
WP_001082436.1	uspA	T	Belongs to the universal stress protein A family
WP_001186837.1	mdmC	S	O-methyltransferase
WP_000232555.1		S	Peptidase M15
WP_000144889.1	fdxA	C	Ferredoxins are iron-sulfur proteins that transfer electrons in a wide variety of metabolic reactions
WP_049081181.1		S	Acetyltransferase (GNAT) domain
WP_047480290.1	mutS	L	that it carries out the mismatch recognition step. This protein has a weak ATPase activity
WP_001290075.1		K	helix_turn_helix ASNC type
WP_005132463.1	rhtA	S	EamA-like transporter family
WP_000633301.1		T	Putative diguanylate phosphodiesterase
WP_047480293.1	lpxL	M	Catalyzes the transfer of laurate from lauroyl-acyl carrier protein (ACP) to Kdo(2)-lipid IV(A) to form Kdo(2)- (lauroyl)-lipid IV(A)
WP_045900608.1		K	Bacterial regulatory proteins, tetR family
WP_047480296.1	pcaK	EGP	Major facilitator Superfamily
WP_045902050.1		S	Uncharacterized protein conserved in bacteria (DUF2147)
WP_047480302.1	nolA	K	TipAS antibiotic-recognition domain
WP_032034960.1
WP_002156379.1
WP_000398504.1		I	3-hydroxyacyl-CoA dehydrogenase, C-terminal domain
WP_079378437.1
WP_001127331.1
WP_000406261.1		K	#NAME?
WP_045902052.1		V	Beta-lactamase enzyme family
WP_045902054.1		S	Phage late control gene D protein (GPD)
WP_047480307.1		M	COG3209 Rhs family protein
1191
WP_047480314.1
1194
WP_152562453.1
WP_001049892.1	MA20_16490	K	LysR substrate binding domain
WP_001987220.1	ycsG	P	Natural resistance-associated macrophage protein
WP_000496067.1	ybgL	S	Belongs to the UPF0271 (lamB) family
WP_000276193.1		S	Belongs to the D-glutamate cyclase family
WP_047480324.1	ybgK	E	Allophanate hydrolase subunit 2
WP_047480326.1	bccA	I	Biotin carboxylase, N-terminal domain
WP_000698630.1	eriC	P	Voltage gated chloride channel
WP_002069401.1		L	Reverse transcriptase (RNA-dependent DNA polymerase)
WP_047480330.1		K	Transcriptional regulator
WP_000921226.1		S	Polyketide cyclase / dehydrase and lipid transport
WP_047480333.1	ybdR	E	Alcohol dehydrogenase GroES-like domain
WP_001090535.1	IV02_09290	S	Domain of unknown function (DUF1989)
WP_000217385.1	ycgI	S	Domain of unknown function (DUF1989)
WP_047480336.1	uca	EI	Allophanate hydrolase subunit 2
WP_047480339.1		S	Flavodoxin-like fold
WP_001118142.1	hxlR	K	HxlR-like helix-turn-helix
1212
WP_001000627.1
WP_001125930.1	nikR	K	NikR C terminal nickel binding domain
WP_000916837.1	atzF	J	Amidase
WP_000591247.1	tauA	P	NMT1-like family
WP_001000082.1		P	ATPases associated with a variety of cellular activities
WP_000542522.1		P	Binding-protein-dependent transport system inner membrane component
WP_000070793.1		S	protein conserved in bacteria
WP_001119042.1	evpA	S	Type VI secretion system, VipA, VC_A0107 or Hcp2
WP_001066523.1	evpB	S	Type VI secretion protein, EvpB/VC_A0108, tail sheath
WP_000653195.1	hcp1	S	Type VI secretion system effector, Hcp
WP_001047031.1	impF	S	Gene 25-like lysozyme
WP_032039541.1	vasA	S	overlaps another CDS with the same product name
WP_000555491.1		S	overlaps another CDS with the same product name
WP_045899604.1		IQ	beta-ketoacyl-acyl-carrier-protein synthase II activity
WP_000556919.1	icmF	S	Type VI secretion protein IcmF C-terminal
WP_045899602.1		S	Uncharacterized protein conserved in bacteria (DUF2094)
WP_001072408.1		M	OmpA family
WP_000168114.1		S	PAAR motif
WP_098714368.1	clpV	O	C-terminal, D2-small domain, of ClpB protein
WP_000020708.1	impA	S	ImpA, N-terminal, type VI secretion system
WP_000471444.1	hsiJ1	S	Bacterial Type VI secretion, VC_A0110, EvfL, ImpJ, VasE
WP_000083629.1	dotU1	S	Type VI secretion system protein DotU
WP_079378439.1
WP_000972583.1		M	D-alanyl-D-alanine carboxypeptidase
WP_047480347.1		K	LysR substrate binding domain
WP_085920601.1	yahD	S	Ankyrin repeat
WP_000646731.1	guaD	FJ	MafB19-like deaminase
WP_047480352.1	cynX	P	Major Facilitator Superfamily
WP_045899596.1	ycaQ	S	Winged helix DNA-binding domain
WP_098714369.1	MA20_05250	K	Acetyltransferase (GNAT) domain
WP_079378389.1	queH	C	Catalyzes the conversion of epoxyqueuosine (oQ) to queuosine (Q), which is a hypermodified base found in the wobble positions of tRNA(Asp), tRNA(Asn), tRNA(His) and tRNA(Tyr)
1245
WP_002058121.1	soxR	K	helix_turn_helix, mercury resistance
WP_000720063.1		S	Domain of unknown function (DUF333)
WP_000065199.1		EM	Dihydrodipicolinate synthetase family
WP_000106979.1	ywfM	EG	EamA-like transporter family
WP_000174668.1		K	FCD domain
WP_032034565.1		E	Proline racemase
WP_047480364.1		E	FAD dependent oxidoreductase
WP_000615330.1		C	2Fe-2S iron-sulfur cluster binding domain
WP_047480366.1	ooxA	C	Thi4 family
WP_004841670.1		K	PAS fold
WP_000214022.1		EGP	Sugar (and other) transporter
WP_047480371.1	aldH	C	Aldehyde dehydrogenase family
WP_047480374.1	yveA	E	Amino acid permease
WP_047480377.1	sdaA	E	Serine dehydratase beta chain
WP_047480379.1	paaN	CI	MaoC like domain
WP_000431128.1	paaA	S	Phenylacetic acid catabolic protein
WP_001984048.1	paaB	Q	Phenylacetic acid degradation B
WP_001016788.1	paaC	S	Phenylacetic acid catabolic protein
WP_047480381.1	paaD	S	Iron-sulfur cluster assembly protein
WP_047480384.1	paaE	C	Oxidoreductase FAD-binding domain
WP_047480387.1	paaF	I	Enoyl-CoA hydratase/isomerase
WP_047480390.1	paaG	I	Enoyl-CoA hydratase/isomerase
WP_047480393.1	paaH	I	3-hydroxyacyl-CoA dehydrogenase, C-terminal domain
WP_047480395.1	pcaF	I	Belongs to the thiolase family
WP_000377855.1	paaK	H	Catalyzes the activation of phenylacetic acid (PA) to phenylacetyl-CoA (PA-CoA)
WP_000062822.1	paaX	K	PaaX-like protein
WP_001112267.1	paaY	S	Bacterial transferase hexapeptide (six repeats)
WP_001984036.1		Q	Thioesterase superfamily
WP_047480398.1	recD2_4	L	Superfamily I DNA and RNA helicases and helicase
WP_047480400.1		G	Major facilitator Superfamily
WP_000898377.1		Q	dioxygenase activity
WP_000224631.1	mazG	H	Tetrapyrrole (Corrin/Porphyrin) Methylases
WP_000052253.1
WP_047481647.1		K	transcriptional regulator
WP_161782819.1
WP_100222666.1	srpA	C	Has an organic peroxide-dependent peroxidase activity
WP_001180289.1	cybB	C	Cytochrome b/b6/petB
WP_001277471.1		S	Domain of unknown function (DUF1330)
WP_001049495.1		K	FCD
WP_000420415.1	HA62_21300	S	Amino acid synthesis
WP_000987212.1		I	Serine aminopeptidase, S33
WP_001293249.1	ntaB	S	Flavin reductase like domain
WP_001212563.1		C	Luciferase-like monooxygenase
WP_047480417.1	dhaS	C	Involved in the biosynthesis of the osmoprotectant glycine betaine. Catalyzes the reversible oxidation of betaine aldehyde to the corresponding acid
WP_000081163.1		U	Permease for cytosine/purines, uracil, thiamine, allantoin
WP_047480420.1		U	hemolysin activation secretion protein
WP_047480422.1	gabD	C	Involved in the biosynthesis of the osmoprotectant glycine betaine. Catalyzes the reversible oxidation of betaine aldehyde to the corresponding acid
WP_000064100.1	pcaC	S	Carboxymuconolactone decarboxylase family
WP_005132337.1		K	LysR substrate binding domain
WP_005132336.1	azoR	I	Catalyzes the reductive cleavage of azo bond in aromatic azo compounds to the corresponding amines. Requires NADH, but not NADPH, as an electron donor for its activity
WP_005132334.1	pobR	K	helix_turn_helix isocitrate lyase regulation
WP_005132333.1	pobA	CH	FAD binding domain
WP_000434318.1	phnR	K	UTRA
WP_000760089.1	HA62_21480	P	Bacterial extracellular solute-binding protein
WP_005132332.1	cysA2	P	ATPases associated with a variety of cellular activities
WP_005132331.1		P	Binding-protein-dependent transport system inner membrane component
WP_005132330.1		E	FAD dependent oxidoreductase
WP_047480426.1	phnW	E	Belongs to the class-V pyridoxal-phosphate-dependent aminotransferase family. PhnW subfamily
WP_000210524.1	phnX	S	Belongs to the HAD-like hydrolase superfamily. PhnX family
WP_005132322.1	mucK	EGP	Major facilitator Superfamily
WP_000617420.1	fadE	C	Acyl-CoA dehydrogenase, C-terminal domain
WP_047480428.1		C	CoA-transferase family III
WP_000996083.1	pcaR	K	helix_turn_helix isocitrate lyase regulation
WP_047480446.1		I	Enoyl-CoA hydratase/isomerase
WP_047480449.1		S	Nitronate monooxygenase
WP_000482230.1	yteJ	S	RDD family
WP_152562422.1	ygaY	EGP	Major facilitator Superfamily
WP_000081482.1	dcaR	K	helix_turn_helix isocitrate lyase regulation
WP_047480454.1	pcaF	I	Belongs to the thiolase family
WP_047480457.1	paaH	I	3-hydroxyacyl-CoA dehydrogenase, C-terminal domain
WP_047480460.1		IQ	Enoyl-(Acyl carrier protein) reductase
WP_000116913.1	crt	I	Enoyl-CoA hydratase/isomerase
WP_000617392.1	dcaA	C	Acyl-CoA dehydrogenase, C-terminal domain
WP_001120951.1	dcaK	EGP	Major facilitator Superfamily
WP_000608703.1	dcaI	I	3-oxoadipate CoA-transferase activity
WP_032018067.1	pcaJ	I	3-oxoadipate CoA-transferase activity
WP_047480465.1	ropAch1	MU	Forms passive diffusion pores that allow small molecular weight hydrophilic materials across the outer membrane
WP_047480468.1	ygaY	EGP	Major facilitator Superfamily
WP_001984007.1		Q	Thioesterase superfamily
WP_047480471.1	acd	C	Acyl-CoA dehydrogenase N terminal
WP_047480473.1		Q	Thioesterase-like superfamily
WP_047480476.1	MA20_35585	C	Pyruvate ferredoxin/flavodoxin oxidoreductase
WP_001230727.1		K	LysR substrate binding domain
WP_005132302.1	yngG	E	HMGL-like
WP_005132298.1	mccA	I	Biotin carboxylase C-terminal domain
WP_047480481.1	liuC	I	Belongs to the enoyl-CoA hydratase isomerase family
WP_047480483.1	mccB	I	Carboxyl transferase domain
WP_001053639.1	ivd	I	Acyl-CoA dehydrogenase, C-terminal domain
WP_002060665.1		K	Bacterial regulatory proteins, tetR family
WP_047480486.1	acsf	IQ	AMP-binding enzyme C-terminal domain
WP_001029914.1		Q	Protein of unknown function (DUF938)
WP_088753006.1	ropAch1	MU	Forms passive diffusion pores that allow small molecular weight hydrophilic materials across the outer membrane
WP_046879552.1		E	GDSL-like Lipase/Acylhydrolase family
WP_046879553.1		K	Transcriptional regulator
WP_079378440.1
WP_000251637.1
WP_001136759.1
WP_000132045.1
WP_047480499.1		S	Iron-containing redox enzyme
WP_152562423.1	katE	C	serves to protect cells from the toxic effects of hydrogen peroxide
WP_000432325.1		IQ	Enoyl-(Acyl carrier protein) reductase
WP_079378441.1
WP_000795915.1
WP_001124839.1	umuD	KT	Peptidase S24-like
WP_005124238.1		E	LysE type translocator
WP_000376213.1	lrp	K	AsnC-type helix-turn-helix domain
WP_152562424.1		F	Belongs to the purine-cytosine permease (2.A.39) family
WP_047480512.1	MA20_23075	T	PhoQ Sensor
WP_000107132.1	MA20_23080	T	helix_turn_helix, Lux Regulon
WP_001025680.1	yjdJ	S	GCN5-related N-acetyl-transferase
WP_000937468.1	papP	P	Binding-protein-dependent transport system inner membrane component
WP_000418066.1	glnP7	P	Binding-protein-dependent transport system inner membrane component
WP_001130360.1	glnQ	E	AAA domain, putative AbiEii toxin, Type IV TA system
WP_047480516.1	cjaA	ET	Bacterial periplasmic substrate-binding proteins
WP_017399106.1	cjaA	ET	Bacterial extracellular solute-binding proteins, family 3
WP_010590619.1		K	LysR substrate binding domain
WP_000267766.1		E	LysE type translocator
WP_047480523.1	sufS	E	Cys/Met metabolism PLP-dependent enzyme
WP_001107594.1	srpI	T	#NAME?
WP_152562425.1	srpH	E	Bacterial transferase hexapeptide (six repeats)
WP_005111151.1	pspE	P	Rhodanese Homology Domain
WP_047480531.1		IQ	KR domain
WP_047480534.1		K	LysR substrate binding domain
WP_001285217.1	yghU	O	Belongs to the GST superfamily
WP_047480537.1	yfcF	O	Glutathione S-transferase, C-terminal domain
WP_000949910.1	ywbI	K	LysR substrate binding domain
WP_014538333.1	cidA	S	LrgA family
WP_001028710.1	ywbG	M	LrgB-like family
WP_047480540.1		K	helix_turn_helix gluconate operon transcriptional repressor
WP_000275749.1	paiB	K	Putative FMN-binding domain
WP_000060326.1		J	Acetyltransferase (GNAT) domain
WP_000941177.1		EGP	Major facilitator Superfamily
WP_000905137.1		S	ChrR Cupin-like domain
WP_001088005.1	gcvA	K	LysR substrate binding domain
WP_005128873.1	mdcA	I	Malonate decarboxylase, alpha subunit, transporter
WP_000968298.1	mdcB	H	Involved in the formation of 2-(5''-phosphoribosyl)-3'- dephosphocoenzyme-A, the prosthetic group of the acyl-carrier protein of the malonate decarboxylase
WP_000448951.1	mdcC	C	Subunit of malonate decarboxylase, it is an acyl carrier protein to which acetyl and malonyl thioester residues are bound via a 2'-(5''-phosphoribosyl)-3'-dephospho-CoA prosthetic group and turn over during the catalytic mechanism
WP_047480547.1	mdcD	I	Carboxyl transferase domain
WP_045899845.1	mdcE	I	Malonate decarboxylase gamma subunit (MdcE)
WP_152562426.1	mdcG	H	Phosphoribosyl-dephospho-CoA transferase MdcG
WP_021510709.1	mdcH	I	Acyl transferase domain
WP_047480556.1	madL	S	Malonate transporter MadL subunit
WP_000229914.1	madM	S	Malonate/sodium symporter MadM subunit
WP_000401807.1	mdcR	K	LysR substrate binding domain
WP_047480559.1	ydcR	K	helix_turn_helix gluconate operon transcriptional repressor
WP_000749814.1
WP_000566431.1	cioB	C	Cytochrome bd terminal oxidase subunit II
WP_000052002.1	cioA	C	Ubiquinol Oxidase
WP_047480561.1
WP_047480563.1		I	Acyl-CoA dehydrogenase, C-terminal domain
WP_017897771.1		C	Luciferase-like monooxygenase
WP_047480566.1		EGP	Major facilitator Superfamily
WP_047480568.1		U	hemolysin activation secretion protein
WP_015451502.1	tauA	P	Substrate binding domain of ABC-type glycine betaine transport system
WP_000114471.1	tauB	P	Part of the ABC transporter complex TauABC involved in taurine import. Responsible for energy coupling to the transport system
WP_001092656.1	tauC	P	Binding-protein-dependent transport system inner membrane component
WP_001099246.1	tauD	Q	Taurine catabolism dioxygenase TauD, TfdA family
WP_045899867.1	hyuE	E	Asp/Glu/Hydantoin racemase
WP_045899870.1	pucI	FH	Permease for cytosine/purines, uracil, thiamine, allantoin
WP_152562427.1		K	FCD
WP_000375416.1		K	LysR substrate binding domain
WP_001043289.1	ycaC	Q	Isochorismatase family
WP_047480574.1	nfdA	S	Amidohydrolase family
WP_000784879.1		S	Protein of unknown function (DUF1427)
WP_047480577.1	arsC	P	ArsC family
WP_000610145.1	arsR	K	helix_turn_helix, Arsenical Resistance Operon Repressor
WP_047480580.1	arsB	P	Sodium Bile acid symporter family
WP_047480583.1		K	LysR substrate binding domain
WP_033917808.1		P	Chromate transporter
WP_000501457.1		P	Chromate transporter
WP_171126838.1	ahpF	C	Alkyl hydroperoxide reductase
WP_047480588.1		S	Alpha beta hydrolase
WP_161782820.1		S	Tetratricopeptide repeat
WP_000917698.1	cysE	E	Serine acetyltransferase, N-terminal
WP_086222306.1	trmJ	J	Catalyzes the formation of 2'O-methylated cytidine (Cm32) or 2'O-methylated uridine (Um32) at position 32 in tRNA
WP_001160984.1	dnaE	L	DNA polymerase
WP_000956445.1	ansB	EJ	Asparaginase
WP_000810595.1	gltP	U	Belongs to the dicarboxylate amino acid cation symporter (DAACS) (TC 2.A.23) family
WP_000078703.1	alaA	E	Aminotransferase
WP_000521160.1	msrB	O	Belongs to the MsrB Met sulfoxide reductase family
WP_000066032.1	btuE	O	Belongs to the glutathione peroxidase family
WP_047480592.1	msmR	K	AraC-like ligand binding domain
WP_047480595.1	rhtC_2	E	LysE type translocator
WP_047481653.1	dapC	E	Aminotransferase class I and II
WP_000611178.1	glnD	O	Modifies, by uridylylation and deuridylylation, the PII regulatory proteins (GlnB and homologs), in response to the nitrogen status of the cell that GlnD senses through the glutamine level. Under low glutamine levels, catalyzes the conversion of the PII proteins and UTP to PII-UMP and PPi, while under higher glutamine levels, GlnD hydrolyzes PII-UMP to PII and UMP (deuridylylation). Thus, control…
WP_085940543.1	purT	F	Involved in the de novo purine biosynthesis. Catalyzes the transfer of formate to 5-phospho-ribosyl-glycinamide (GAR), producing 5-phospho-ribosyl-N-formylglycinamide (FGAR). Formate is provided by PurU via hydrolysis of 10-formyl-tetrahydrofolate
WP_000084509.1	Z012_06190	S	Tautomerase enzyme
WP_032058458.1	ygaH	S	Branched-chain amino acid transport protein (AzlD)
WP_152562454.1	ygaZ	E	AzlC protein
WP_000477056.1
WP_000736701.1
WP_032058456.1	crp_1	K	Cyclic nucleotide-monophosphate binding domain
WP_032058455.1		S	Protein of unknown function (DUF962)
WP_000506572.1	ychF	J	ATPase that binds to both the 70S ribosome and the 50S ribosomal subunit in a nucleotide-independent manner
WP_001153960.1	metI	P	Binding-protein-dependent transport system inner membrane component
WP_086231287.1	metN2	P	Part of the ABC transporter complex MetNIQ involved in methionine import. Responsible for energy coupling to the transport system
WP_001007360.1	metQ3	P	NLPA lipoprotein
WP_000079412.1	metQ3	P	NLPA lipoprotein
WP_032061315.1	ntaA_1	C	Luciferase-like monooxygenase
WP_000205199.1		I	Acyl-CoA dehydrogenase, C-terminal domain
WP_096877449.1		I	Acyl-CoA dehydrogenase, C-terminal domain
WP_001265503.1		O	Glutathione S-transferase, C-terminal domain
WP_000830363.1	gltI	ET	Bacterial periplasmic substrate-binding proteins
WP_000110649.1	gltJ	P	Binding-protein-dependent transport system inner membrane component
WP_000347804.1	gltK	P	Binding-protein-dependent transport system inner membrane component
WP_003112785.1	gltL	E	ABC transporter
WP_161782821.1	ropAch1	MU	Forms passive diffusion pores that allow small molecular weight hydrophilic materials across the outer membrane
WP_000418050.1		K	Lrp/AsnC ligand binding domain
WP_000907230.1	yebC	K	transcriptional regulatory protein
WP_000713973.1	plsC2	I	Phosphate acyltransferases
1464		K	Bacterial regulatory proteins, tetR family
WP_001124728.1
WP_000108020.1		L	Belongs to the 'phage' integrase family
WP_047480614.1		K	LysR substrate binding domain
WP_001161758.1		S	Chlorhexidine efflux transporter
WP_002057402.1	fcy21	U	Permease for cytosine/purines, uracil, thiamine, allantoin
WP_001046931.1
WP_161782822.1	yyaM	EG	EamA-like transporter family
WP_047480620.1		K	LysR substrate binding domain
WP_000905609.1
WP_000738477.1		NU	Fimbrial protein
1475	mrkC	NU	usher protein
WP_047480622.1	yehC	M	Pili assembly chaperone PapD, C-terminal domain
WP_152562428.1		NU	Type-1 fimbrial protein, A
WP_001061891.1
WP_000030993.1
WP_001985405.1	bioB	H	Catalyzes the conversion of dethiobiotin (DTB) to biotin by the insertion of a sulfur atom into dethiobiotin via a radical- based mechanism
WP_001987644.1	queG	C	Catalyzes the conversion of epoxyqueuosine (oQ) to queuosine (Q), which is a hypermodified base found in the wobble positions of tRNA(Asp), tRNA(Asn), tRNA(His) and tRNA(Tyr)
WP_047480625.1	nnrD	G	Bifunctional enzyme that catalyzes the epimerization of the S- and R-forms of NAD(P)HX and the dehydration of the S-form of NAD(P)HX at the expense of ADP, which is converted to AMP. This allows the repair of both epimers of NAD(P)HX, a damaged form of NAD(P)H that is a result of enzymatic or heat-dependent hydration
WP_001128330.1	ruvC	L	Nuclease that resolves Holliday junction intermediates in genetic recombination. Cleaves the cruciform structure in supercoiled DNA by nicking to strands with the same polarity at sites symmetrically opposed at the junction in the homologous arms and leaves a 5'-terminal phosphate and a 3'-terminal hydroxyl group
WP_000340967.1		K	Helix-turn-helix domain
WP_001109738.1	yncA	M	Acetyltransferase (GNAT) domain
WP_047480628.1	bla	M	Penicillin binding protein transpeptidase domain
WP_001050729.1	fxsA	S	FxsA cytoplasmic membrane protein
WP_032051606.1
WP_000458766.1
WP_001209544.1	metK	H	Catalyzes the formation of S-adenosylmethionine (AdoMet) from methionine and ATP. The overall synthetic reaction is composed of two sequential steps, AdoMet formation and the subsequent tripolyphosphate hydrolysis which occurs prior to release of AdoMet from the enzyme
WP_047480633.1	tkt	G	Catalyzes the transfer of a two-carbon ketol group from a ketose donor to an aldose acceptor, via a covalent intermediate with the cofactor thiamine pyrophosphate
WP_000248284.1	XK27_07670	O	OsmC-like protein
WP_000550331.1	yceI	S	YceI-like domain
WP_001187976.1	pspA	KT	Lecithin retinol acyltransferase
WP_052109206.1	yigE	S	Phosphodiester glycosidase
WP_000011679.1
WP_032000172.1	trmA	J	Dual-specificity methyltransferase that catalyzes the formation of 5-methyluridine at position 54 (m5U54) in all tRNAs, and that of position 341 (m5U341) in tmRNA (transfer-mRNA)
WP_047480639.1		S	GrpB protein
WP_085944077.1	putA	CE	Oxidizes proline to glutamate for use as a carbon and nitrogen source
WP_001014235.1	lrp	K	helix_turn_helix ASNC type
WP_002057420.1	putP	E	Belongs to the sodium solute symporter (SSF) (TC 2.A.21) family
WP_086245484.1	cobB	K	NAD-dependent lysine deacetylase and desuccinylase that specifically removes acetyl and succinyl groups on target proteins. Modulates the activities of several proteins which are inactive in their acylated form
WP_001016343.1	gcvH	E	The glycine cleavage system catalyzes the degradation of glycine. The H protein shuttles the methylamine group of glycine from the P protein to the T protein
WP_000705524.1		K	Arabinose-binding domain of AraC transcription regulator, N-term
WP_000966086.1	maoC	I	N-terminal half of MaoC dehydratase
WP_000922240.1	Z012_08870	V	ABC transporter
WP_016685879.1	yaiL	S	Uncharacterized protein conserved in bacteria (DUF2058)
WP_001116532.1		S	Protein of unknown function (DUF1275)
WP_000889008.1	sstT	E	Involved in the import of serine and threonine into the cell, with the concomitant import of sodium (symport system)
WP_000651464.1	bigR	K	helix_turn_helix, Arsenical Resistance Operon Repressor
WP_000037059.1		K	Bacterial regulatory proteins, tetR family
WP_000133514.1	ycfD	S	A domain family that is part of the cupin metalloenzyme superfamily.
WP_016685878.1	maf	D	Maf-like protein
WP_045901485.1		S	Uncharacterized protein conserved in bacteria (DUF2237)
WP_001011094.1	pgk	F	Belongs to the phosphoglycerate kinase family
WP_001049817.1
WP_001174011.1	fba	G	Fructose-bisphosphate aldolase class-II
WP_000850091.1	surA	M	Chaperone involved in the correct folding and assembly of outer membrane proteins. Recognizes specific patterns of aromatic residues and the orientation of their side chains, which are found more frequently in integral outer membrane proteins. May act in both early periplasmic and late outer membrane-associated steps of protein maturation
WP_047480646.1	lptD	M	Together with LptE, is involved in the assembly of lipopolysaccharide (LPS) at the surface of the outer membrane
WP_001096100.1		S	Phosphotransferase enzyme family
WP_000646465.1	rmlA	JM	COG1208 Nucleoside-diphosphate-sugar pyrophosphorylase involved in lipopolysaccharide biosynthesis translation initiation factor 2B, gamma epsilon subunits (eIF-2Bgamma eIF-2Bepsilon)
WP_000553193.1	rsmG	J	Specifically methylates the N7 position of guanine in position 527 of 16S rRNA
WP_000057212.1	parA	D	4Fe-4S iron sulfur cluster binding proteins, NifH/frxC family
WP_000023431.1	parB	K	Belongs to the ParB family
WP_000264037.1	exbB2	U	MotA/TolQ/ExbB proton channel family
WP_000669684.1	exbD2	U	Biopolymer transport protein ExbD/TolR
WP_001070729.1	msbA	V	Involved in lipid A export and possibly also in glycerophospholipid export and for biogenesis of the outer membrane. Transmembrane domains (TMD) form a pore in the inner membrane and the ATP-binding domain (NBD) is responsible for energy generation
WP_002068489.1	lpxK	M	Transfers the gamma-phosphate of ATP to the 4'-position of a tetraacyldisaccharide 1-phosphate intermediate (termed DS-1- P) to form tetraacyldisaccharide 1,4'-bis-phosphate (lipid IVA)
WP_000680697.1	kdsB	M	Activates KDO (a required 8-carbon sugar) for incorporation into bacterial lipopolysaccharide in Gram-negative bacteria
WP_001075416.1	holB	L	DNA polymerase III
WP_001183025.1	pilZ	NU	PilZ domain
WP_000497298.1	ycfH	L	TatD related DNase
WP_000375838.1	tetR7	K	Transcriptional regulator
WP_000841373.1		U	Pfam:N_methyl_2
WP_000836914.1	gspI	NU	Type II secretion system (T2SS), protein I
WP_000594580.1	gspJ	U	general secretion pathway protein
WP_047480652.1	gspK	U	Type II secretion system (T2SS), protein K
WP_000908453.1	queD	H	6-pyruvoyl tetrahydropterin synthase
WP_001177528.1	ung	L	Excises uracil residues from the DNA which can arise as a result of misincorporation of dUMP residues by DNA polymerase or due to deamination of cytosine
WP_012297164.1	paaG	I	Enoyl-CoA hydratase
WP_000033177.1	tadA	FJ	Catalyzes the deamination of adenosine to inosine at the wobble position 34 of tRNA(Arg2)
WP_001246675.1		I	Polyketide cyclase / dehydrase and lipid transport
WP_000218018.1	cmk	F	Belongs to the cytidylate kinase family. Type 1 subfamily
WP_000140309.1	rpsA	J	thus facilitating recognition of the initiation point. It is needed to translate mRNA with a short Shine-Dalgarno (SD) purine-rich sequence
WP_000205997.1	himD	K	This protein is one of the two subunits of integration host factor, a specific DNA-binding protein that functions in genetic recombination as well as in transcriptional and translational control
WP_001269278.1		S	Lipopolysaccharide assembly protein A domain
WP_000392928.1	pyrF	F	Catalyzes the decarboxylation of orotidine 5'- monophosphate (OMP) to uridine 5'-monophosphate (UMP)
WP_045901501.1		S	Lysine exporter LysO
WP_086222297.1		P	Flavin-binding monooxygenase-like
WP_086222305.1		K	helix_turn_helix, arabinose operon control protein
WP_000933387.1	zapE	D	Reduces the stability of FtsZ polymers in the presence of ATP
WP_000126961.1	glcB	C	Involved in the glycolate utilization. Catalyzes the condensation and subsequent hydrolysis of acetyl-coenzyme A (acetyl-CoA) and glyoxylate to form malate and CoA
WP_000609117.1	speG	K	Acetyltransferase (GNAT) domain
WP_039251386.1	exbD2	U	Biopolymer transport protein ExbD/TolR
WP_000525862.1	exbD1	U	Biopolymer transport protein ExbD/TolR
WP_001983904.1	exbB	U	MotA/TolQ/ExbB proton channel family
WP_045901510.1	tonB	U	Interacts with outer membrane receptor proteins that carry out high-affinity binding and energy dependent uptake into the periplasmic space of specific substrates. It could act to transduce energy from the cytoplasmic membrane to specific energy- requiring processes in the outer membrane, resulting in the release into the periplasm of ligands bound by these outer membrane proteins
WP_161782823.1		P	TonB dependent receptor
WP_047480660.1	hbpA	E	Bacterial extracellular solute-binding proteins, family 5 Middle
WP_152562429.1		E	Bacterial extracellular solute-binding proteins, family 5 Middle
WP_152562430.1	prlC	E	Peptidase family M3
WP_000881924.1		P	Binding-protein-dependent transport system inner membrane component
WP_000953840.1	oppC	P	N-terminal TM domain of oligopeptide transport permease C
WP_047480668.1	gsiA	P	Belongs to the ABC transporter superfamily
WP_001117472.1		S	SOS response associated peptidase (SRAP)
WP_000979740.1
WP_000471059.1	cysQ	P	Inositol monophosphatase family
WP_001162376.1		G	Histidine phosphatase superfamily (branch 1)
WP_000013652.1	rpsT	J	Binds directly to 16S ribosomal RNA
WP_000156078.1	yraR	GM	Nucleoside-diphosphate-sugar epimerases
WP_000108826.1	rraA	H	Catalyzes the aldol cleavage of 4-hydroxy-4-methyl-2- oxoglutarate (HMG) into 2 molecules of pyruvate. Also contains a secondary oxaloacetate (OAA) decarboxylase activity due to the common pyruvate enolate transition state formed following C-C bond cleavage in the retro-aldol and decarboxylation reactions
WP_118978294.1		O	Glutathione S-transferase, N-terminal domain
WP_001222570.1	yfeX	P	Dyp-type peroxidase family
WP_000473802.1
WP_047480677.1	mfd	L	Couples transcription and DNA repair by recognizing RNA polymerase (RNAP) stalled at DNA lesions. Mediates ATP-dependent release of RNAP and its truncated transcript from the DNA, and recruitment of nucleotide excision repair machinery to the damaged site
WP_000492048.1	MA20_21960	FG	HIT domain
WP_001137383.1	fdx	C	Ferredoxin, 2Fe-2S type, ISC system
WP_001196574.1	hscA	O	Chaperone involved in the maturation of iron-sulfur cluster-containing proteins. Has a low intrinsic ATPase activity which is markedly stimulated by HscB
WP_001015254.1	hscB	O	Co-chaperone involved in the maturation of iron-sulfur cluster-containing proteins. Seems to help targeting proteins to be folded toward HscA
WP_000581597.1	iscA	C	Is able to transfer iron-sulfur clusters to apo- ferredoxin. Multiple cycles of 2Fe2S cluster formation and transfer are observed, suggesting that IscA acts catalytically. Recruits intracellular free iron so as to provide iron for the assembly of transient iron-sulfur cluster in IscU in the presence of IscS, L-cysteine and the thioredoxin reductase system
WP_000331712.1	iscU	C	A scaffold on which IscS assembles Fe-S clusters. It is likely that Fe-S cluster coordination is flexible as the role of this complex is to build and then hand off Fe-S clusters
WP_000828390.1	iscS	E	Master enzyme that delivers sulfur to a number of partners involved in Fe-S cluster assembly, tRNA modification or cofactor biosynthesis. Catalyzes the removal of elemental sulfur atoms from cysteine to produce alanine. Functions as a sulfur delivery protein for Fe-S cluster synthesis onto IscU, an Fe-S scaffold assembly protein, as well as other S acceptor proteins
WP_001241480.1	iscR	K	Transcriptional regulator
1586
WP_000368000.1	phaI	S	Poly(hydroxyalcanoate) granule associated protein (phasin)
WP_001043034.1	hupB	L	Histone-like DNA-binding protein which is capable of wrapping DNA to stabilize it, and thus to prevent its denaturation under extreme environmental conditions
WP_045901541.1	ppiD	O	Peptidylprolyl isomerase
WP_161782809.1	alkR	K	Cupin
WP_047480681.1	alkM	P	Fatty acid desaturase
WP_001053241.1	fadE23	I	Acyl-CoA dehydrogenase, C-terminal domain
WP_171126853.1	fadE24	I	Acyl-CoA dehydrogenase, C-terminal domain
WP_000070798.1		S	ABC1 family
WP_001251464.1
WP_000186520.1	ybaK	S	Belongs to the prolyl-tRNA editing family. YbaK EbsC subfamily
WP_045901546.1		Q	IucA / IucC family
1598	iucD	Q	L-lysine 6-monooxygenase (NADPH-requiring)
WP_047480683.1	emrB	U	Sugar (and other) transporter
WP_047480686.1		Q	IucA / IucC family
WP_047480689.1	asbA	Q	IucA / IucC family
WP_045901555.1		S	FhuF 2Fe-2S C-terminal domain
WP_047480692.1		H	Pfam:Methyltransf_6
WP_047480694.1		P	TonB dependent receptor
WP_000018791.1
WP_045901563.1		S	PepSY-associated TM region
WP_045901566.1
WP_000956973.1	iucB	J	Siderophore biosynthesis protein domain
WP_079378444.1	mtlD	G	Haloacid dehalogenase-like hydrolase
WP_045901571.1		J	2'-5' RNA ligase superfamily
WP_000939716.1	cobU	H	Catalyzes ATP-dependent phosphorylation of adenosylcobinamide and addition of GMP to adenosylcobinamide phosphate
WP_045901574.1	cobT	H	Catalyzes the synthesis of alpha-ribazole-5'-phosphate from nicotinate mononucleotide (NAMN) and 5,6- dimethylbenzimidazole (DMB)
WP_045901577.1	cobC	G	Phosphoglycerate mutase family
WP_047480698.1		S	Histidine phosphatase superfamily (branch 2)
WP_045901583.1	cobS	H	Joins adenosylcobinamide-GDP and alpha-ribazole to generate adenosylcobalamin (Ado-cobalamin). Also synthesizes adenosylcobalamin 5'-phosphate from adenosylcobinamide-GDP and alpha-ribazole 5'-phosphate
WP_000572397.1	aroF	E	Stereospecific condensation of phosphoenolpyruvate (PEP) and D-erythrose-4-phosphate (E4P) giving rise to 3-deoxy-D- arabino-heptulosonate-7-phosphate (DAHP)
WP_000011876.1	MA20_18170	S	Sulfite exporter TauE/SafE
WP_045901586.1
WP_161782824.1		S	PepSY-associated TM region
WP_000540012.1
WP_047480703.1		P	TonB dependent receptor
WP_002059113.1	lpxB	M	Condensation of UDP-2,3-diacylglucosamine and 2,3- diacylglucosamine-1-phosphate to form lipid A disaccharide, a precursor of lipid A, a phosphorylated glycolipid that anchors the lipopolysaccharide to the outer membrane of the cell
WP_045901598.1	pltZ	K	Domain of unknown function (DUF1956)
WP_047480707.1		V	Barrel-sandwich domain of CusB or HlyD membrane-fusion
WP_047480710.1	ybhF	V	AAA domain, putative AbiEii toxin, Type IV TA system
WP_047480712.1	ybhS	V	ABC-2 family transporter protein
WP_047480714.1	ybhR	V	ABC-2 family transporter protein
WP_002000245.1	LA2027	S	Protein of unknown function (DUF2797)
WP_000840537.1
WP_045901609.1	yidB	S	Bacterial protein of unknown function (DUF937)
WP_000734913.1	porB	M	Gram-negative porin
WP_000312749.1	hit	FG	Scavenger mRNA decapping enzyme C-term binding
WP_045901611.1		S	YARHG
WP_002068544.1		S	Glutathione-dependent formaldehyde-activating enzyme
WP_000564581.1
WP_000826151.1
WP_000800035.1		S	TonB C terminal
WP_032043202.1	yafE	Q	DREV methyltransferase
WP_000825836.1	phaC	I	alpha/beta hydrolase fold
WP_000202011.1	metZ	E	Catalyzes the formation of L-homocysteine from O- succinyl-L-homoserine (OSHS) and hydrogen sulfide
WP_000917295.1
WP_001024697.1	ybaB	S	Binds to DNA and alters its conformation. May be involved in regulation of gene expression, nucleoid organization and DNA protection
WP_000490551.1	recR	L	May play a role in DNA repair. It seems to be involved in an RecBC-independent recombinational process of DNA repair. It may act with RecF and RecO
WP_000486120.1	rnd	J	HRDC domain
WP_000183704.1
WP_001056906.1
WP_005132021.1	osmB	S	COG3668 Plasmid stabilization system protein
WP_000543500.1	ycgL	S	YcgL domain
WP_047480724.1
WP_001271636.1	moxR	S	AAA domain (Cdc48 subfamily)
WP_045901617.1	MA20_01305	S	VWA domain containing CoxE-like protein
WP_001164635.1	trpB	E	The beta subunit is responsible for the synthesis of L- tryptophan from indole and L-serine
WP_000441019.1	prmB	J	Specifically methylates the 50S ribosomal protein L3 on a specific glutamine residue
WP_000918444.1	aroC	E	Catalyzes the anti-1,4-elimination of the C-3 phosphate and the C-6 proR hydrogen from 5-enolpyruvylshikimate-3-phosphate (EPSP) to yield chorismate, which is the branch point compound that serves as the starting substrate for the three terminal pathways of aromatic amino acid biosynthesis. This reaction introduces a second double bond into the aromatic ring system
WP_000775755.1		T	diguanylate cyclase
WP_000126114.1	pqqC2	H	Iron-containing redox enzyme
WP_000367591.1		KQ	Transcriptional regulator
WP_000364554.1	lipA	H	Catalyzes the radical-mediated insertion of two sulfur atoms into the C-6 and C-8 positions of the octanoyl moiety bound to the lipoyl domains of lipoate-dependent enzymes, thereby converting the octanoylated domains into lipoylated derivatives
WP_001177517.1	acoA	C	Dehydrogenase E1 component
WP_001133053.1	acoB	C	Transketolase, C-terminal domain
WP_052109207.1	acoC	C	2-oxoacid dehydrogenases acyltransferase (catalytic domain)
WP_045901621.1	lpdA	C	Pyridine nucleotide-disulphide oxidoreductase, dimerisation domain
WP_031965353.1		IQ	COG1028 Dehydrogenases with different specificities (related to short-chain alcohol dehydrogenases)
WP_000642313.1	bdhA	C	Alcohol dehydrogenase GroES-like domain
WP_047480733.1	yneE	S	Bestrophin, RFP-TM, chloride channel
WP_047480736.1		K	Sigma-54 interaction domain
WP_047480738.1		S	Metallo-beta-lactamase superfamily
WP_047480741.1	fccB	S	Pyridine nucleotide-disulphide oxidoreductase
WP_024439056.1		S	Sulfite exporter TauE/SafE
WP_047480744.1	hom	E	Homoserine dehydrogenase
WP_001023744.1	BP3797	EG	EamA-like transporter family
WP_000331400.1	tetD	K	helix_turn_helix, arabinose operon control protein
WP_001983845.1		K	HxlR-like helix-turn-helix
WP_047480747.1	azoR	I	Catalyzes the reductive cleavage of azo bond in aromatic azo compounds to the corresponding amines. Requires NADH, but not NADPH, as an electron donor for its activity
WP_001186382.1	chrA	P	Chromate transporter
WP_000080819.1	yidP	K	UTRA
WP_000428990.1	MA20_14860	C	Fumarate reductase flavoprotein C-term
WP_000864076.1	MA20_14855	C	4Fe-4S binding domain
WP_047480752.1		P	NMT1-like family
WP_033852355.1		P	Binding-protein-dependent transport system inner membrane component
WP_000117518.1		P	ATPases associated with a variety of cellular activities
WP_033852358.1		C	E-Z type HEAT repeats
WP_033852360.1		S	Protein of unknown function (DUF971)
WP_047480757.1	kgtP	EGP	Sugar (and other) transporter
WP_045901645.1		P	TonB dependent receptor
WP_000980437.1	aspA	E	Fumarase C C-terminus
WP_000922092.1
WP_000668585.1
1689		K	LysR substrate binding domain
WP_001983834.1		K	LysR substrate binding domain
WP_045901648.1	atoB	I	Belongs to the thiolase family
WP_000414929.1	atoE	I	Short chain fatty acid transporter
WP_045901651.1	scoB	I	Coenzyme A transferase
WP_001045572.1	scoA	I	Coenzyme A transferase
WP_000172956.1		K	LysR substrate binding domain
WP_161325534.1
WP_017816462.1
WP_114252305.1		EG	COG2610 H gluconate symporter and related permeases
WP_045544156.1		IQ	KR domain
WP_001987950.1		K	AraC-binding-like domain
WP_045544155.1	pcaK	EGP	Uncharacterised MFS-type transporter YbfB
WP_045544154.1		Q	Dienelactone hydrolase family
WP_001017885.1		IQ	short-chain dehydrogenase
WP_152562431.1		C	oxidoreductase
WP_000379602.1		S	Flavin reductase like domain
WP_045901657.1		C	Putative MetA-pathway of phenol degradation
WP_001070631.1		K	AraC-binding-like domain
WP_086222291.1	antC	C	Oxidoreductase FAD-binding domain
WP_000076811.1	antB	Q	Ring hydroxylating beta subunit
WP_045901660.1	antA	P	Ring hydroxylating alpha subunit (catalytic domain)
WP_000664116.1	modE	H	Bacterial regulatory helix-turn-helix protein, lysR family
WP_002047359.1	modA	P	Bacterial extracellular solute-binding protein
WP_002067642.1	modB	P	COG4149 ABC-type molybdate transport system, permease component
WP_045901665.1	modC	P	ABC transporter
WP_047480771.1		IQ	Enoyl-(Acyl carrier protein) reductase
WP_000026862.1	dhbB	Q	Isochorismatase family
1717	fur	P	Ferric uptake regulator family
WP_047480775.1	yhcR	F	5'-nucleotidase, C-terminal domain
WP_002047338.1	ppk	H	Catalyzes the reversible transfer of the terminal phosphate of ATP to form a long-chain polyphosphate (polyP)
WP_005128677.1	pqqB	S	May be involved in the transport of PQQ or its precursor to the periplasm
WP_047480779.1	pqqC	H	Ring cyclization and eight-electron oxidation of 3a-(2- amino-2-carboxyethyl)-4,5-dioxo-4,5,6,7,8,9-hexahydroquinoline- 7,9-dicarboxylic-acid to PQQ
WP_047480782.1	pqqD	S	Coenzyme PQQ synthesis protein D (PqqD)
WP_047480785.1	pqqE	S	Iron-sulfur cluster-binding domain
WP_045901673.1	acdP	E	Membrane dipeptidase (Peptidase family M19)
WP_000044010.1
WP_000582742.1	mug	L	DNA glycosylase
WP_045901679.1	CP_0318	I	Phospholipase D
WP_001136802.1
WP_045901683.1
WP_045901684.1		P	Catalase
WP_079282591.1		S	Glycoside hydrolase family 24
WP_047480789.1	frmA	C	Belongs to the zinc-containing alcohol dehydrogenase family. Class-III subfamily
WP_047480792.1		S	Domain of unknown function (DUF4882)
WP_047480795.1		NU	Fimbrial protein
WP_001124961.1	mrkC	NU	usher protein
WP_000774086.1	yehC	M	Pili assembly chaperone PapD, C-terminal domain
WP_000731819.1		NU	Type-1 fimbrial protein, A
WP_000794351.1
WP_047480798.1		I	long-chain fatty acid transport protein
WP_047480801.1
WP_001059825.1		E	FAD dependent oxidoreductase
WP_000217818.1		K	Bacterial regulatory proteins, tetR family
WP_047480804.1		E	saccharopine dehydrogenase activity
WP_000759717.1	hpaY	E	Flavin containing amine oxidoreductase
WP_047480807.1		P	Flavin-binding monooxygenase-like
WP_000427716.1		S	Acetyl xylan esterase (AXE1)
WP_047480810.1	oprM	M	Outer membrane efflux protein
WP_000987604.1	acrF	V	MMPL family
WP_047480813.1	acrE	M	Barrel-sandwich domain of CusB or HlyD membrane-fusion
WP_032034877.1		KT	Transcriptional regulatory protein, C terminal
WP_024433859.1	adeS	T	PhoQ Sensor
WP_047480818.1
WP_000373596.1		G	TRAP-type C4-dicarboxylate transport system periplasmic component
WP_047480822.1		K	Arabinose-binding domain of AraC transcription regulator, N-term
WP_047480825.1		S	Acetyl xylan esterase (AXE1)
WP_047480828.1		IQ	KR domain
WP_047480831.1	dap2	E	serine-type peptidase activity
WP_001016251.1
WP_001002974.1	kptA	J	Removes the 2'-phosphate from RNA via an intermediate in which the phosphate is ADP-ribosylated by NAD followed by a presumed transesterification to release the RNA and generate ADP- ribose 1''-2''-cyclic phosphate (APPR P). May function as an ADP- ribosylase
1763	ttr	K	Acetyltransferase (GNAT) domain
WP_079378398.1		S	Protein of unknown function (DUF2974)
WP_047480836.1		K	transcriptional regulator
WP_000737062.1	rggD	K	Helix-turn-helix XRE-family like proteins
WP_023896711.1		KT	In eubacteria ppGpp (guanosine 3'-diphosphate 5-' diphosphate) is a mediator of the stringent response that coordinates a variety of cellular activities in response to changes in nutritional abundance
WP_047480842.1
WP_152562432.1	surE	S	Survival protein SurE
WP_047480848.1
WP_152562455.1		MU	Outer membrane efflux protein
WP_047480853.1		IQ	GH3 auxin-responsive promoter
WP_075874782.1
WP_047480856.1		EGP	Major Facilitator Superfamily
WP_047480860.1	emrA	V	HlyD membrane-fusion protein of T1SS
WP_047480862.1	iaaH	J	Amidase
WP_047480865.1		K	helix_turn_helix, Lux Regulon
WP_017390787.1
WP_047480871.1		S	Protein of unknown function (DUF4236)
WP_152562433.1
WP_047480875.1		K	Domain of unknown function (DUF4062)
WP_047480881.1
WP_161782825.1	metF	E	Methylene-tetrahydrofolate reductase C terminal
WP_000155298.1		F	NUDIX domain
WP_047480886.1	nadV	H	Nicotinate phosphoribosyltransferase (NAPRTase) family
WP_047480889.1		EF	Phosphoribosyl transferase domain
WP_161782826.1		S	Sulfite exporter TauE/SafE
WP_032059476.1	ripA_2	K	AraC-like ligand binding domain
WP_161782810.1		K	Acetyltransferase (GNAT) domain
WP_047480900.1		P	AAA domain, putative AbiEii toxin, Type IV TA system
WP_152562434.1	fecD	P	Belongs to the binding-protein-dependent transport system permease family. FecCD subfamily
WP_047480906.1		P	Periplasmic binding protein
WP_000206303.1	adhC2	S	Alcohol dehydrogenase GroES-like domain
1795		K	AraC-type transcriptional regulator N-terminus
WP_032060258.1	glxR	I	Ketopantoate reductase PanE/ApbA
WP_047480915.1		G	COG0477 Permeases of the major facilitator superfamily
WP_001101635.1	MA20_27225	M	Male sterility protein
WP_000774594.1		K	LysR substrate binding domain
WP_047480920.1		S	Fumarylacetoacetate (FAA) hydrolase family
WP_000999643.1	ilvD1	EG	Dehydratase family
WP_047480923.1	aldH	C	Aldehyde dehydrogenase family
WP_001278393.1		K	Bacterial regulatory proteins, tetR family
WP_001026286.1		EGP	Major Facilitator Superfamily
WP_005123986.1		V	Barrel-sandwich domain of CusB or HlyD membrane-fusion
WP_045901776.1		S	Putative inner membrane exporter, YdcZ
WP_047480930.1		S	Putative inner membrane exporter, YdcZ
WP_000366420.1		K	LysR substrate binding domain
WP_000053785.1		G	Sugar (and other) transporter
WP_045901784.1		K	SMP-30/Gluconolaconase/LRE-like region
WP_047480935.1		K	UTRA
WP_000126040.1		P	Dicarboxylate carrier protein MatC N-terminus
WP_047481665.1		S	Amidohydrolase
WP_016685633.1		G	Major facilitator superfamily
WP_000469446.1
WP_045901786.1		S	chitinase
WP_171071923.1		S	Domain of unknown function (DUF333)
WP_000770269.1
WP_000721410.1
WP_000174324.1
WP_045901792.1		K	transcriptional regulator
WP_052109208.1		S	Peptidase dimerisation domain
WP_031222685.1
WP_047480941.1	kefB	P	Belongs to the monovalent cation proton antiporter 2 (CPA2) transporter (TC 2.A.37) family
WP_001032874.1	gdhB	G	Glucose / Sorbosone dehydrogenase
WP_045901798.1		K	transcriptional regulator
WP_000200064.1	ycaC	Q	Isochorismatase family
WP_001277237.1		S	Antibiotic biosynthesis monooxygenase
WP_032061657.1		K	Bacterial regulatory proteins, tetR family
WP_047480943.1	romA	S	Beta-lactamase superfamily domain
WP_005138974.1		K	Transcriptional regulator
WP_032061660.1		C	Pyridine nucleotide-disulphide oxidoreductase
WP_004841099.1		S	DJ-1/PfpI family
WP_001026795.1	cueR	K	helix_turn_helix, mercury resistance
WP_032000616.1		S	DJ-1/PfpI family
WP_047480951.1	lys	S	Saccharopine dehydrogenase NADP binding domain
WP_000862286.1		C	NADH:flavin oxidoreductase / NADH oxidase family
WP_045901806.1	cpo	I	Serine aminopeptidase, S33
WP_047480955.1		S	acetoacetate decarboxylase
1841	aldH	C	Aldehyde dehydrogenase family
WP_001165777.1		S	protein conserved in bacteria
WP_000323347.1	IV02_10655	G	COG0477 Permeases of the major facilitator superfamily
WP_001060808.1	IV02_10650	EG	Dehydratase family
WP_000029961.1	IV02_10645	K	FCD
WP_152562456.1		S	Bacterial protein of unknown function (Gcw_chp)
WP_000423293.1	benM	K	Transcriptional regulator
WP_001986121.1	catB	G	Mandelate racemase / muconate lactonizing enzyme, C-terminal domain
WP_000897235.1	catC	Q	Muconolactone delta-isomerase
WP_001081618.1	catA	Q	Catechol dioxygenase N terminus
WP_000565989.1	pcaI	I	3-oxoadipate CoA-transferase activity
WP_029424790.1	pcaJ	I	3-oxoadipate CoA-transferase activity
WP_047480966.1	pcaF	I	Belongs to the thiolase family
WP_032018315.1	pcaD	E	Alpha/beta hydrolase family
WP_047480970.1	pac	S	Penicillin amidase
WP_031380426.1	feaB	C	Involved in the biosynthesis of the osmoprotectant glycine betaine. Catalyzes the reversible oxidation of betaine aldehyde to the corresponding acid
WP_031380425.1		E	Involved in the biosynthesis of the osmoprotectant glycine betaine. Catalyzes the oxidation of choline to betaine aldehyde and betaine aldehyde to glycine betaine at the same rate
WP_152562457.1		M	Forms passive diffusion pores that allow small molecular weight hydrophilic materials across the outer membrane
WP_152562435.1	tynA	Q	Copper amine oxidase, enzyme domain
WP_045899752.1		K	AraC-binding-like domain
WP_002073339.1	C1-hpah	S	Flavin reductase like domain
WP_045899749.1		C	2Fe-2S iron-sulfur cluster binding domain
WP_047480977.1		IQ	KR domain
WP_001056937.1	hcaA2	Q	Ring hydroxylating beta subunit
WP_001084470.1	antA	P	Ring hydroxylating alpha subunit (catalytic domain)
WP_000130498.1		S	SnoaL-like domain
WP_000387550.1
WP_060706136.1		I	Acyl-CoA dehydrogenase, C-terminal domain
WP_005138947.1	gatA	J	Amidase
WP_000884019.1		K	helix_turn_helix multiple antibiotic resistance protein
WP_047480980.1		G	Organic Anion Transporter Polypeptide (OATP) family
WP_047480982.1		S	outer membrane porin, OprD family
WP_005131579.1		S	Belongs to the short-chain dehydrogenases reductases (SDR) family
WP_047480984.1		G	Phosphoglycerate mutase family
WP_000110873.1		S	Phosphotransferase enzyme family
WP_045899737.1	HA62_10695	I	acyl-CoA dehydrogenase
WP_045899736.1		K	Bacterial regulatory helix-turn-helix protein, lysR family
WP_000030961.1	pcaU	K	helix_turn_helix isocitrate lyase regulation
WP_002068148.1	blh	S	Metallo-beta-lactamase superfamily
WP_000789127.1		S	Transporter Component
WP_000095349.1		S	Sulphur transport
WP_001211835.1
WP_045899729.1	quiA	G	PQQ-like domain
WP_047480989.1	oprB	M	Carbohydrate-selective porin, OprB family
WP_045899725.1	quiC	P	Periplasmic copper-binding protein (NosD)
WP_152562458.1	aroD	E	Involved in the third step of the chorismate pathway, which leads to the biosynthesis of aromatic amino acids. Catalyzes the cis-dehydration of 3-dehydroquinate (DHQ) and introduces the first double bond of the aromatic ring to yield 3- dehydroshikimate
WP_001067206.1	pcaG	Q	Dioxygenase
WP_000077913.1	pcaH	Q	Protocatechuate 3,4-dioxygenase beta subunit N terminal
WP_000997505.1	pcaC	S	Carboxymuconolactone decarboxylase family
WP_000168125.1	pcaK	G	Uncharacterised MFS-type transporter YbfB
WP_047480991.1	pcaD	S	Ndr family
WP_045899720.1	pcaB	F	Adenylosuccinate lyase C-terminus
WP_047480993.1	pcaF	I	Belongs to the thiolase family
WP_000121783.1	pcaJ	I	3-oxoadipate CoA-transferase activity
WP_000565989.1	pcaI	I	3-oxoadipate CoA-transferase activity
WP_001216218.1	ispD	I	Catalyzes the formation of 4-diphosphocytidyl-2-C- methyl-D-erythritol from CTP and 2-C-methyl-D-erythritol 4- phosphate (MEP)
WP_002010301.1	ftsB	D	Essential cell division protein. May link together the upstream cell division proteins, which are predominantly cytoplasmic, with the downstream cell division proteins, which are predominantly periplasmic
1898	ycaP	S	Protein of unknown function (DUF421)
WP_000078452.1	eno	G	Catalyzes the reversible conversion of 2- phosphoglycerate into phosphoenolpyruvate. It is essential for the degradation of carbohydrates via glycolysis
WP_047480995.1	kdsA	M	Belongs to the KdsA family
WP_000148658.1	pyrG	F	Catalyzes the ATP-dependent amination of UTP to CTP with either L-glutamine or ammonia as the source of nitrogen. Regulates intracellular CTP levels through interactions with the four ribonucleotide triphosphates
WP_001284535.1
WP_011859415.1		S	Predicted metal-dependent hydrolase
WP_000513050.1		S	hydrolase of the alpha beta-hydrolase fold
WP_045900980.1		E	GDSL-like Lipase/Acylhydrolase family
WP_045900977.1		S	SnoaL-like domain
WP_000061161.1	fadH	C	2,4-dienoyl-coA reductase
WP_000056571.1	MA20_19850	K	Virulence activator alpha C-term
WP_045900975.1		S	Alpha/beta hydrolase family
WP_045900971.1	aroF	E	Stereospecific condensation of phosphoenolpyruvate (PEP) and D-erythrose-4-phosphate (E4P) giving rise to 3-deoxy-D- arabino-heptulosonate-7-phosphate (DAHP)
WP_002040450.1	ynfA	S	Uncharacterised BCR, YnfA/UPF0060 family
WP_000952702.1	clpA	O	ATP-dependent Clp protease ATP-binding subunit
WP_001260033.1	clpS	S	Involved in the modulation of the specificity of the ClpAP-mediated ATP-dependent protein degradation
WP_002004964.1
WP_000558176.1	argC	E	Catalyzes the NADPH-dependent reduction of N-acetyl-5- glutamyl phosphate to yield N-acetyl-L-glutamate 5-semialdehyde
WP_045900969.1
WP_000110125.1		S	Protein of unknown function DUF45
WP_000061059.1	rpiA	G	Catalyzes the reversible conversion of ribose-5- phosphate to ribulose 5-phosphate
WP_001983729.1	ilvA	E	Catalyzes the anaerobic formation of alpha-ketobutyrate and ammonia from threonine in a two-step reaction. The first step involved a dehydration of threonine and a production of enamine intermediates (aminocrotonate), which tautomerizes to its imine form (iminobutyrate). Both intermediates are unstable and short- lived. The second step is the nonenzymatic hydrolysis of the enamine imine intermedi…
WP_001983728.1	trkA	P	TrkA-N domain
WP_000053917.1	ktrB	P	potassium uptake protein, TrkH
WP_000885655.1	pldA	M	Phospholipase
WP_087486616.1	CP_0875	S	Peptidase M16C associated
WP_045900961.1		P	TonB dependent receptor
WP_000214227.1	pfkB	G	pfkB family carbohydrate kinase
WP_000134203.1		P	Rieske [2Fe-2S] domain
WP_000753036.1		S	Protein of unknown function (DUF1449)
WP_000053889.1
WP_000622647.1	cydA	C	oxidase, subunit
WP_000575152.1	cydB	C	oxidase, subunit
WP_000270276.1		S	Membrane bound YbgT-like protein
WP_085916945.1	ybgE	S	Cyd operon protein YbgE (Cyd_oper_YbgE)
WP_004746954.1		K	Acetyltransferase (GNAT) domain
WP_000175347.1		S	Belongs to the UPF0319 family
WP_000102943.1		S	Nitroreductase family
WP_001187342.1	ftsY	U	Involved in targeting and insertion of nascent membrane proteins into the cytoplasmic membrane. Acts as a receptor for the complex formed by the signal recognition particle (SRP) and the ribosome-nascent chain (RNC). Interaction with SRP-RNC leads to the transfer of the RNC complex to the Sec translocase for insertion into the membrane, the hydrolysis of GTP by both Ffh and FtsY, and the dissocia…
WP_000955082.1
WP_000185571.1
WP_000616034.1
WP_077163451.1		S	Protein of unknown function (DUF2750)
WP_000156920.1		S	Domain in cystathionine beta-synthase and other proteins.
WP_000129949.1	argD	E	acetylornithine aminotransferase
WP_000138830.1	grxD	C	Belongs to the glutaredoxin family. Monothiol subfamily
WP_005131537.1
WP_000954523.1	VL23_16385	K	LysR substrate binding domain
WP_001202776.1	map	E	Metallopeptidase family M24
WP_001186685.1	brnQ	U	Component of the transport system for branched-chain amino acids
WP_000838063.1	glcG	S	Haem-degrading
WP_000949688.1
WP_000365974.1
WP_004739177.1		S	Serine aminopeptidase, S33
WP_000880352.1	fruB	G	Phosphoenolpyruvate-dependent sugar phosphotransferase system, EIIA 2
WP_047481003.1	fruK	H	Belongs to the carbohydrate kinase PfkB family
WP_047481004.1	fruA	G	Phosphotransferase system, EIIC
WP_000734807.1	Z012_00645
WP_000163427.1		K	helix_turn_helix multiple antibiotic resistance protein
WP_001129188.1
1958		T	Putative diguanylate phosphodiesterase
WP_000120225.1		T	Universal stress protein
WP_047481006.1	gdhB	G	Glucose / Sorbosone dehydrogenase
WP_000332546.1		S	Belongs to the SOS response-associated peptidase family
WP_047481008.1	ybaR	P	STAS domain
WP_005131522.1	pstI	M	Belongs to the peptidase S8 family
WP_047481010.1		I	alpha/beta hydrolase fold
WP_032017073.1	gabP	E	Amino acid permease
WP_000632788.1	kynU	E	Catalyzes the cleavage of L-kynurenine (L-Kyn) and L-3- hydroxykynurenine (L-3OHKyn) into anthranilic acid (AA) and 3- hydroxyanthranilic acid (3-OHAA), respectively
WP_001099948.1	lrp_1	K	helix_turn_helix ASNC type
WP_000573232.1		J	Acetyltransferase (GNAT) domain
1969
WP_000525041.1
1971		S	Fels-1 Prophage Protein-like
WP_000349160.1	yrfG	E	Haloacid dehalogenase-like hydrolase
WP_000040959.1	hslR	J	Belongs to the HSP15 family
WP_000344169.1	recA	L	Can catalyze the hydrolysis of ATP in the presence of single-stranded DNA, the ATP-dependent uptake of single-stranded DNA by duplex DNA, and the ATP-dependent hybridization of homologous single-stranded DNAs. It interacts with LexA causing its activation and leading to its autocatalytic cleavage
WP_000476756.1	recX	S	Regulatory protein recX
WP_001178068.1	cpoB	D	TolA binding protein trimerisation
WP_000064875.1	lpxA	M	Involved in the biosynthesis of lipid A, a phosphorylated glycolipid that anchors the lipopolysaccharide to the outer membrane of the cell
WP_000140523.1	fabZ	I	Involved in unsaturated fatty acids biosynthesis. Catalyzes the dehydration of short chain beta-hydroxyacyl-ACPs and long chain saturated and unsaturated beta-hydroxyacyl-ACPs
WP_047481017.1	lpxD	M	Catalyzes the N-acylation of UDP-3-O-acylglucosamine using 3-hydroxyacyl-ACP as the acyl donor. Is involved in the biosynthesis of lipid A, a phosphorylated glycolipid that anchors the lipopolysaccharide to the outer membrane of the cell
WP_001037943.1	skp	M	Outer membrane protein (OmpH-like)
WP_161401687.1	bamA	M	Part of the outer membrane protein assembly complex, which is involved in assembly and insertion of beta-barrel proteins into the outer membrane
WP_000992586.1	rseP	M	zinc metalloprotease
WP_000194641.1	dxr	I	Catalyzes the NADP-dependent rearrangement and reduction of 1-deoxy-D-xylulose-5-phosphate (DXP) to 2-C-methyl-D-erythritol 4-phosphate (MEP)
WP_000893489.1	cdsA	I	Belongs to the CDS family
WP_047481019.1	uppS	H	Catalyzes the sequential condensation of isopentenyl diphosphate (IPP) with (2E,6E)-farnesyl diphosphate (E,E-FPP) to yield (2Z,6Z,10Z,14Z,18Z,22Z,26Z,30Z,34E,38E)-undecaprenyl diphosphate (di-trans,octa-cis-UPP). UPP is the precursor of glycosyl carrier lipid in the biosynthesis of bacterial cell wall polysaccharide components such as peptidoglycan and lipopolysaccharide
WP_000606428.1	frr	J	Responsible for the release of ribosomes from messenger RNA at the termination of protein biosynthesis. May increase the efficiency of translation by recycling ribosomes from one round of translation to another
WP_000852257.1	pyrH	F	Catalyzes the reversible phosphorylation of UMP to UDP
WP_000856678.1	rimO	J	Catalyzes the methylthiolation of an aspartic acid residue of ribosomal protein S12
WP_000371970.1	glnL	T	PAS domain
WP_000089273.1	glnG	T	response regulator
WP_000543879.1		K	Bacterial regulatory proteins, tetR family
WP_001207983.1	argF	E	Reversibly catalyzes the transfer of the carbamoyl group from carbamoyl phosphate (CP) to the N(epsilon) atom of ornithine (ORN) to produce L-citrulline
WP_000209127.1		T	Tyrosine phosphatase family
WP_000226512.1	ispF	I	Involved in the biosynthesis of isopentenyl diphosphate (IPP) and dimethylallyl diphosphate (DMAPP), two major building blocks of isoprenoid compounds. Catalyzes the conversion of 4- diphosphocytidyl-2-C-methyl-D-erythritol 2-phosphate (CDP-ME2P) to 2-C-methyl-D-erythritol 2,4-cyclodiphosphate (ME-CPP) with a corresponding release of cytidine 5-monophosphate (CMP)
WP_002016639.1		G	4-amino-4-deoxy-alpha-L-arabinopyranosyl undecaprenyl phosphate biosynthetic process
WP_001120919.1	MA20_32330	E	FAD dependent oxidoreductase
WP_000949167.1
WP_047481021.1
WP_000701849.1
WP_047481023.1	fumC	C	Involved in the TCA cycle. Catalyzes the stereospecific interconversion of fumarate to L-malate
WP_047481025.1		M	RmlD substrate binding domain
WP_000105718.1	tusD	P	DsrE/DsrF-like family
WP_000859777.1
WP_000194631.1
WP_001047539.1	tusE	P	Part of a sulfur-relay system
WP_086222397.1	ydeK	EG	EamA-like transporter family
WP_161782811.1	norG	K	helix_turn_helix gluconate operon transcriptional repressor
WP_000870671.1		K	HxlR-like helix-turn-helix
WP_047481032.1	moeA	H	Probable molybdopterin binding domain
WP_047481033.1	moaC	H	Catalyzes the conversion of (8S)-3',8-cyclo-7,8- dihydroguanosine 5'-triphosphate to cyclic pyranopterin monophosphate (cPMP)
WP_000657202.1	moaE	H	Molybdopterin converting factor, large subunit
WP_001187656.1	moaD	H	ThiS family
WP_086222393.1	moaA	H	Catalyzes the cyclization of GTP to (8S)-3',8-cyclo-7,8- dihydroguanosine 5'-triphosphate
WP_045901971.1		C	Molybdopterin oxidoreductase Fe4S4 domain
WP_001032654.1	mobA	H	Transfers a GMP moiety from GTP to Mo-molybdopterin (Mo- MPT) cofactor (Moco or molybdenum cofactor) to form Mo- molybdopterin guanine dinucleotide (Mo-MGD) cofactor
WP_047481037.1	nasA	C	Belongs to the prokaryotic molybdopterin-containing oxidoreductase family
WP_001028494.1	nirD	CP	Rieske-like [2Fe-2S] domain
WP_171126855.1	nirB	C	Belongs to the nitrite and sulfite reductase 4Fe-4S domain family
WP_000114559.1
WP_001125253.1	nasT	T	ANTAR
WP_047481040.1	nasS	P	NMT1-like family
WP_000652029.1	umuC	L	DNA polymerase
WP_000099412.1	aroQ	E	Catalyzes a trans-dehydration via an enolate intermediate
WP_000354611.1	accB	I	first, biotin carboxylase catalyzes the carboxylation of the carrier protein and then the transcarboxylase transfers the carboxyl group to form malonyl-CoA
WP_000939648.1	accC	I	Biotin carboxylase
WP_001238660.1
WP_161782812.1	hcaT	EGP	Major facilitator Superfamily
2029	yidX
2030	lexA_2	KT	Peptidase S24-like
2031	umuC	L	DNA polymerase
WP_047481053.1		S	Glycosyl hydrolase 108
WP_047481056.1		S	Domain of unknown function (DUF4882)
WP_000433906.1
WP_047481058.1		M	Amylovoran biosynthesis protein AmsF
WP_047481060.1		S	cellulase activity
WP_047481063.1
WP_047481066.1		S	Domain of unknown function (DUF1833)
WP_000277438.1
[truncated: 1,321 more rows]
